# Supplementary material for: Why different ligands can control stereochemistry selectivity of Ni-catalyzed Suzuki–Miyaura cross-coupling of benzylic carbamates with arylboronic esters: a mechanistic study
Source: Royal Society of Chemistry journal article supplement (doi:10.1039/c7dt02532g), 2017-01-01
Supplement: c7dt02532g1.pdf [file c7dt02532g1.pdf]

## Supporting Information

### **Why different Ligands Can Control Stereochemistry Selectivity of Ni-Catalyzed Suzuki-Miyaura Cross-Coupling of Benzylic Carbamates with Arylboronic Esters: A Mechanistic Study**

Hujun Xie,<sup>†,\*</sup> Yang Li,<sup>†</sup> Lihong Wang,<sup>†</sup> Jian Kuang,<sup>†</sup> Qunfang Lei<sup>‡</sup> and Wenjun Fang<sup>‡</sup>

<sup>†</sup>*Department of Applied Chemistry, Zhejiang Gongshang University, Hangzhou 310018, People's Republic of China.*

<sup>‡</sup>*Department of Chemistry, Zhejiang University, Hangzhou 310027, People's Republic of China.*

#### TABLE OF CONTENT

|                                                                                            |        |
|--------------------------------------------------------------------------------------------|--------|
| I. CARTESIAN COORDINATES AND ELECTRONIC ENERGIES FOR ALL OF THE CALCULATED STRUCTURES..... | S2-S36 |
|--------------------------------------------------------------------------------------------|--------|

# I. Cartesian coordinates and electronic energies for all of the calculated structures

|            |              |           |           |            |              |           |           |
|------------|--------------|-----------|-----------|------------|--------------|-----------|-----------|
| <b>P1</b>  |              |           |           | P          | 4.250180     | -1.117945 | -0.443085 |
| SCF done:  | -295.498618  |           |           | C          | 5.239570     | -1.752481 | 1.038255  |
| Ni         | 1.624349     | -0.000500 | -0.000309 | H          | 4.753382     | -2.648350 | 1.434785  |
| P          | -0.499738    | -0.000133 | -0.000617 | H          | 6.271791     | -1.988705 | 0.753706  |
| C          | -1.353082    | -0.311263 | 1.657284  | H          | 5.244825     | -0.989946 | 1.822817  |
| H          | -1.053913    | 0.463120  | 2.369208  | C          | 4.649151     | -2.458526 | -1.717011 |
| H          | -2.443983    | -0.302184 | 1.544615  | H          | 4.251782     | -2.162007 | -2.692434 |
| H          | -1.035759    | -1.280906 | 2.050873  | H          | 5.730899     | -2.617216 | -1.799359 |
| C          | -1.352918    | 1.592048  | -0.557916 | H          | 4.167450     | -3.393598 | -1.416666 |
| H          | -1.048956    | 1.826168  | -1.582000 | C          | 5.391042     | 0.267563  | -1.048007 |
| H          | -2.443718    | 1.487734  | -0.515449 | H          | 6.420391     | -0.087664 | -1.176655 |
| H          | -1.040352    | 2.415784  | 0.089967  | H          | 5.015943     | 0.651139  | -2.001562 |
| C          | -1.356280    | -1.279111 | -1.097689 | H          | 5.376767     | 1.085657  | -0.321671 |
| H          | -2.446844    | -1.193667 | -1.020796 |            |              |           |           |
| H          | -1.051223    | -1.127586 | -2.136886 | <b>P2b</b> |              |           |           |
| H          | -1.047283    | -2.282514 | -0.791710 | SCF done:  | -1351.799368 |           |           |
|            |              |           |           | C          | -0.931574    | 1.506609  | -1.030055 |
| <b>P2a</b> |              |           |           | Ni         | 0.446579     | -0.584212 | 0.325041  |
| SCF done:  | -1351.797501 |           |           | O          | -1.542315    | -1.094257 | 0.258679  |
| C          | -4.388494    | -0.290634 | 0.049841  | C          | -2.358063    | -0.493821 | -0.466677 |
| C          | -4.782797    | -1.307043 | -0.881113 | O          | -2.168490    | 0.663441  | -1.119965 |
| C          | -3.782257    | -1.897366 | -1.700566 | N          | -3.597361    | -0.989913 | -0.680695 |
| C          | -2.466795    | -1.501349 | -1.606396 | C          | -4.661226    | -0.329219 | -1.454189 |
| C          | -2.066114    | -0.494247 | -0.685289 | C          | -5.912395    | -1.140475 | -1.080498 |
| C          | -3.020887    | 0.089669  | 0.123963  | C          | -5.358074    | -2.549827 | -0.802039 |
| C          | -5.385333    | 0.309612  | 0.869668  | C          | -4.015530    | -2.277065 | -0.105163 |
| C          | -6.706200    | -0.075004 | 0.775295  | C          | 0.334443     | 0.679182  | -1.142787 |
| C          | -7.094844    | -1.080808 | -0.146865 | C          | 0.502606     | -0.059791 | -2.386206 |
| C          | -6.152719    | -1.681386 | -0.955379 | C          | 1.723242     | -0.458858 | -2.847663 |
| C          | -0.589161    | -0.147166 | -0.603475 | C          | 2.941440     | -0.119847 | -2.151602 |
| Ni         | 2.084642     | -0.653840 | -0.062258 | C          | 2.845732     | 0.606326  | -0.926502 |
| O          | 1.761442     | 1.382852  | -0.498919 | C          | 1.539143     | 0.921897  | -0.366874 |
| C          | 0.658862     | 1.917378  | -0.297777 | H          | -4.444895    | -0.388789 | -2.529661 |
| O          | -0.530920    | 1.284049  | -0.290557 | H          | -4.733389    | 0.727857  | -1.185449 |
| N          | 0.526581     | 3.241023  | -0.064530 | H          | -6.669041    | -1.122898 | -1.871098 |
| C          | -0.749145    | 3.952798  | 0.118705  | H          | -6.366970    | -0.727697 | -0.171064 |
| C          | -0.335781    | 5.430260  | 0.023123  | H          | -5.189024    | -3.082157 | -1.746627 |
| C          | 1.107649     | 5.435989  | 0.559429  | H          | -6.026371    | -3.161825 | -0.188351 |
| C          | 1.698680     | 4.126138  | 0.014546  | H          | -4.129792    | -2.185939 | 0.983680  |
| C          | 0.205170     | -0.959718 | 0.415298  | H          | -3.259665    | -3.044243 | -0.295879 |
| C          | -0.014897    | -0.735770 | 1.822233  | H          | -0.387256    | -0.291454 | -2.970478 |
| C          | 0.305059     | -1.685279 | 2.768344  | H          | 1.797254     | -1.021930 | -3.776239 |
| C          | 0.825730     | -2.953913 | 2.380041  | H          | 1.530840     | 1.706369  | 0.389800  |
| C          | 1.064477     | -3.211807 | 1.048493  | P          | 1.484623     | -1.824078 | 1.899445  |
| C          | 0.829703     | -2.219951 | 0.039804  | C          | 2.941308     | -2.844848 | 1.264881  |
| H          | -4.071508    | -2.666106 | -2.414090 | H          | 3.660134     | -2.177491 | 0.781277  |
| H          | -1.718340    | -1.962413 | -2.246974 | H          | 3.430110     | -3.383894 | 2.085000  |
| H          | -2.735353    | 0.865487  | 0.828396  | H          | 2.582452     | -3.562238 | 0.521012  |
| H          | -5.086419    | 1.079410  | 1.578176  | C          | 2.305361     | -0.904815 | 3.333105  |
| H          | -7.455995    | 0.391598  | 1.409338  | H          | 1.546477     | -0.354625 | 3.897522  |
| H          | -8.138802    | -1.376559 | -0.212820 | H          | 2.822239     | -1.601550 | 4.003577  |
| H          | -6.447250    | -2.453290 | -1.663441 | H          | 3.026191     | -0.188065 | 2.929767  |
| H          | -0.144337    | -0.286770 | -1.594913 | C          | 0.513939     | -3.143787 | 2.846224  |
| H          | -1.179511    | 3.716768  | 1.101563  | H          | 1.155702     | -3.673766 | 3.559726  |
| H          | -1.472294    | 3.653605  | -0.644629 | H          | -0.312989    | -2.669178 | 3.383146  |
| H          | -1.007870    | 6.085095  | 0.586466  | H          | 0.094139     | -3.860851 | 2.134377  |
| H          | -0.350542    | 5.755953  | -1.024624 | C          | 4.040691     | 0.996121  | -0.282201 |
| H          | 1.102896     | 5.417621  | 1.656581  | H          | 3.974944     | 1.574989  | 0.637930  |
| H          | 1.680967     | 6.312559  | 0.242162  | C          | 4.214845     | -0.457872 | -2.657319 |
| H          | 2.140197     | 4.259407  | -0.982479 | H          | 4.277026     | -1.014722 | -3.591012 |
| H          | 2.463872     | 3.687663  | 0.661303  | C          | 5.286255     | 0.651871  | -0.796445 |
| H          | -0.462651    | 0.203958  | 2.139963  | H          | 6.191242     | 0.959625  | -0.277355 |
| H          | 0.134049     | -1.473310 | 3.821574  | C          | 5.376997     | -0.087059 | -1.990582 |
| H          | 1.025199     | -3.711431 | 3.134147  | H          | 6.349695     | -0.356137 | -2.394987 |
| H          | 1.435361     | -4.188326 | 0.740129  | H          | -1.071428    | 2.086232  | -1.949402 |
| H          | 0.764166     | -2.567660 | -0.992703 | C          | -1.048825    | 2.474919  | 0.129851  |

|                         |           |           |           |                         |           |           |           |
|-------------------------|-----------|-----------|-----------|-------------------------|-----------|-----------|-----------|
| C                       | -1.164876 | 2.056104  | 1.464823  | H                       | 6.527848  | 1.595494  | 0.291965  |
| C                       | -1.050269 | 3.849747  | -0.144160 | H                       | 5.275866  | 2.708575  | 0.894622  |
| C                       | -1.276632 | 2.993244  | 2.494600  |                         |           |           |           |
| H                       | -1.155008 | 0.994890  | 1.696884  | <b>P4c</b>              |           |           |           |
| C                       | -1.150486 | 4.790155  | 0.885596  | SCF done: -1351.797592  |           |           |           |
| H                       | -0.968593 | 4.189661  | -1.174596 | C                       | -3.806724 | 0.440628  | 0.351587  |
| C                       | -1.266240 | 4.363058  | 2.210529  | C                       | -4.801534 | -0.540368 | 0.030926  |
| H                       | -1.367384 | 2.651947  | 3.523149  | C                       | -4.431277 | -1.630524 | -0.806981 |
| H                       | -1.143223 | 5.851623  | 0.650822  | C                       | -3.148630 | -1.741644 | -1.293973 |
| H                       | -1.349888 | 5.089607  | 3.014977  | C                       | -2.153471 | -0.773220 | -0.976754 |
|                         |           |           |           | C                       | -2.491220 | 0.294083  | -0.173250 |
| <b>PTS<sub>3c</sub></b> |           |           |           | C                       | -4.169169 | 1.533794  | 1.186790  |
| SCF done: -1351.744909  |           |           |           | C                       | -5.451730 | 1.653581  | 1.681576  |
| C                       | -2.333333 | 1.719298  | 0.000000  | C                       | -6.435062 | 0.682906  | 1.362452  |
| C                       | -3.395786 | 1.095291  | -0.734005 | C                       | -6.114365 | -0.389249 | 0.554975  |
| C                       | -3.071573 | 0.388415  | -1.925858 | C                       | -0.742693 | -0.925395 | -1.550394 |
| C                       | -1.769657 | 0.307057  | -2.359530 | Ni                      | 1.447777  | -0.053015 | -0.241502 |
| C                       | -0.713413 | 0.923558  | -1.630756 | O                       | 1.153394  | 1.736441  | 1.752267  |
| C                       | -0.995129 | 1.620054  | -0.474733 | O                       | 1.290237  | 1.658496  | 0.526647  |
| C                       | -2.649580 | 2.426576  | 1.194072  | C                       | 0.044376  | 0.220371  | -1.399892 |
| C                       | -3.949466 | 2.512566  | 1.639805  | N                       | 1.312613  | 2.745763  | -0.273295 |
| C                       | -4.999117 | 1.896623  | 0.911171  | C                       | 1.500824  | 2.759560  | -1.735711 |
| C                       | -4.727913 | 1.205048  | -0.248400 | C                       | 1.815086  | 4.233764  | -2.029321 |
| C                       | 0.705931  | 0.774267  | -2.145133 | C                       | 0.989777  | 4.985785  | -0.969311 |
| Ni                      | 2.961876  | 0.784140  | -0.685623 | C                       | 1.122287  | 4.102676  | 0.281031  |
| O                       | 1.534185  | 2.640336  | 0.708985  | C                       | -0.022997 | -2.166993 | -0.982786 |
| C                       | 2.306098  | 2.542205  | -0.277927 | C                       | -0.142487 | -2.543053 | 0.367862  |
| O                       | 1.608785  | 1.855570  | -1.720765 | C                       | 0.524230  | -3.670910 | 0.857966  |
| N                       | 2.957201  | 3.623655  | -0.797840 | C                       | 1.326281  | -4.440844 | 0.008453  |
| C                       | 3.767874  | 3.609871  | -2.041175 | C                       | 1.467360  | -4.069272 | -1.332937 |
| C                       | 4.210419  | 5.083764  | -2.170378 | C                       | 0.799296  | -2.941727 | -1.819956 |
| C                       | 2.973368  | 5.857407  | -1.643127 | H                       | -5.181522 | -2.377151 | -1.060709 |
| C                       | 2.498580  | 5.004645  | -0.442286 | H                       | -2.885666 | -2.582929 | -1.933410 |
| C                       | 1.371361  | -0.547648 | -1.699268 | H                       | -1.735681 | 1.040677  | 0.052440  |
| C                       | 0.863119  | -1.359042 | -0.670900 | H                       | -3.412139 | 2.275218  | 1.433085  |
| C                       | 1.538595  | -2.518079 | -0.282759 | H                       | -5.713066 | 2.494050  | 2.319974  |
| C                       | 2.736929  | -2.884649 | -0.904664 | H                       | -7.442894 | 0.786592  | 1.756942  |
| C                       | 3.264876  | -2.079038 | -1.916478 | H                       | -6.866744 | -1.136003 | 0.308393  |
| C                       | 2.591236  | -0.917384 | -2.315479 | H                       | -0.864324 | -1.116032 | -2.633981 |
| H                       | -3.871005 | -0.081781 | -2.489822 | H                       | 0.587464  | 2.420768  | -2.233982 |
| H                       | -1.534493 | -0.232429 | -3.272371 | H                       | 2.307085  | 2.078867  | -2.024099 |
| H                       | -0.195643 | 2.088777  | 0.092513  | H                       | 1.556886  | 4.515130  | -3.055451 |
| H                       | -1.840607 | 2.896133  | 1.743924  | H                       | 2.885384  | 4.433485  | -1.884847 |
| H                       | -4.178899 | 3.053856  | 2.550852  | H                       | -0.060601 | 5.038703  | -1.281924 |
| H                       | -6.018090 | 1.974351  | 1.273669  | H                       | 1.338966  | 6.008825  | -0.794136 |
| H                       | -5.528421 | 0.732586  | -0.809003 | H                       | 1.991290  | 4.382493  | 0.892767  |
| H                       | 0.675660  | 0.780600  | -3.246087 | H                       | 0.242976  | 4.124816  | 0.931883  |
| H                       | 3.141653  | 3.300535  | -2.882344 | H                       | -0.788320 | -1.966564 | 1.024810  |
| H                       | 4.605637  | 2.913153  | -1.942070 | H                       | 0.398772  | -3.960148 | 1.898927  |
| H                       | 4.470169  | 5.347932  | -3.198763 | H                       | 1.827658  | -5.329059 | 0.385727  |
| H                       | 5.072796  | 5.273782  | -1.521330 | H                       | 2.084199  | -4.664429 | -2.002341 |
| H                       | 2.197044  | 5.870192  | -2.415641 | H                       | 0.898051  | -2.663338 | -2.867416 |
| H                       | 3.205920  | 6.886052  | -1.355276 | P                       | 3.317894  | -0.518998 | 1.003037  |
| H                       | 2.972289  | 5.327553  | 0.491368  | C                       | 2.942178  | -0.976314 | 2.784711  |
| H                       | 1.414684  | 5.008853  | -0.306067 | H                       | 2.374488  | -1.910312 | 2.804797  |
| H                       | -0.069603 | -1.078070 | -0.197417 | H                       | 3.867910  | -1.096120 | 3.357976  |
| H                       | 1.122435  | -3.142263 | 0.500816  | H                       | 2.331015  | -0.177178 | 3.211662  |
| H                       | 3.247397  | -3.795451 | -0.611521 | C                       | 4.408944  | -1.934165 | 0.413160  |
| H                       | 4.186593  | -2.362016 | -2.413695 | H                       | 4.809747  | -1.696630 | -0.576702 |
| H                       | 2.967803  | -0.327058 | -3.146285 | H                       | 5.238437  | -2.098184 | 1.109792  |
| P                       | 4.453789  | 0.391948  | 0.943002  | H                       | 3.809347  | -2.844924 | 0.336626  |
| C                       | 3.543746  | 0.545875  | 2.601506  | C                       | 4.551844  | 0.885560  | 1.200203  |
| H                       | 2.986979  | -0.377844 | 2.785098  | H                       | 5.399557  | 0.564395  | 1.815155  |
| H                       | 4.239291  | 0.730605  | 3.425507  | H                       | 4.913965  | 1.197824  | 0.216575  |
| H                       | 2.832372  | 1.368800  | 2.486096  | H                       | 4.049250  | 1.728796  | 1.680279  |
| C                       | 5.483729  | -1.188855 | 1.162680  |                         |           |           |           |
| H                       | 6.182985  | -1.283537 | 0.326978  | <b>PTS<sub>3a</sub></b> |           |           |           |
| H                       | 6.040749  | -1.157876 | 2.103839  | SCF done: -1351.778490  |           |           |           |
| H                       | 4.811980  | -2.050450 | 1.156833  | C                       | -3.695371 | -0.775915 | 0.551859  |
| C                       | 5.774774  | 1.751939  | 1.070087  | C                       | -4.558096 | -1.336031 | -0.448064 |
| H                       | 6.256187  | 1.746404  | 2.052432  | C                       | -3.983818 | -1.751854 | -1.679939 |





|   |           |           |           |   |           |           |           |
|---|-----------|-----------|-----------|---|-----------|-----------|-----------|
| H | 3.308052  | 4.181353  | -0.387551 | H | 2.378230  | -3.118458 | 1.235630  |
| H | 1.942148  | 6.461047  | -1.155240 | C | -0.127932 | -3.105106 | -1.741235 |
| H | 1.978216  | 5.968835  | 0.545823  | H | 0.314913  | -4.033010 | -2.120176 |
| H | -0.217972 | 5.338325  | -1.499919 | H | -1.010141 | -3.335165 | -1.140580 |
| H | -0.439465 | 6.063401  | 0.101584  | H | -0.428699 | -2.468763 | -2.577378 |
| H | 0.005446  | 3.948324  | 1.216623  | C | 4.238080  | -0.550184 | 1.400817  |
| H | -0.747329 | 3.333996  | -0.260574 | H | 3.824795  | -1.156031 | 2.204417  |
| H | -0.960421 | -2.874154 | 0.357751  | C | 5.313998  | 1.037428  | -0.637226 |
| H | 0.375473  | -4.927625 | 0.680796  | H | 5.731858  | 1.665717  | -1.421118 |
| H | 2.276528  | -5.440630 | -0.840539 | C | 5.562756  | -0.709543 | 1.019003  |
| H | 2.905236  | -3.812962 | -2.622461 | H | 6.186875  | -1.444542 | 1.520846  |
| H | 1.600158  | -1.734434 | -2.924729 | C | 6.103431  | 0.082190  | -0.013977 |
| P | 2.768013  | -0.864545 | 1.376530  | H | 7.140699  | -0.047086 | -0.311217 |
| C | 2.817283  | -2.312733 | 2.586628  | C | -2.343691 | 3.574193  | -1.487098 |
| H | 2.774616  | -3.254761 | 2.032547  | H | -2.465456 | 3.694085  | -2.561094 |
| H | 3.733895  | -2.287108 | 3.186632  | C | -3.192287 | 4.253700  | -0.606274 |
| H | 1.950786  | -2.262229 | 3.253146  | H | -3.966849 | 4.913047  | -0.989817 |
| C | 4.428335  | -1.015257 | 0.507672  |   |           |           |           |
| H | 4.519445  | -0.162720 | -0.169613 |   |           |           |           |
| H | 5.249299  | -1.018133 | 1.233602  |   |           |           |           |
| H | 4.452891  | -1.942214 | -0.072853 |   |           |           |           |
| C | 3.044811  | 0.597935  | 2.523347  |   |           |           |           |
| H | 3.903888  | 0.413354  | 3.178062  |   |           |           |           |
| H | 3.228806  | 1.483870  | 1.912206  |   |           |           |           |
| H | 2.149399  | 0.763832  | 3.128727  |   |           |           |           |

**P4b**

SCF done: -1351.842149

|    |           |           |           |
|----|-----------|-----------|-----------|
| C  | -3.044125 | 4.064199  | 0.770897  |
| C  | -2.048614 | 3.214936  | 1.257948  |
| C  | -1.173444 | 2.538566  | 0.386775  |
| C  | -1.352240 | 2.722875  | -0.997985 |
| C  | -0.133470 | 1.659101  | 0.956887  |
| Ni | 0.300507  | -0.166149 | 0.146673  |
| O  | -1.493302 | -0.505706 | -0.414621 |
| C  | -2.085955 | -1.340939 | 0.398713  |
| O  | -1.509245 | -1.966412 | 1.319623  |
| N  | -3.427272 | -1.522628 | 0.165239  |
| C  | -4.254030 | -2.377420 | 1.020457  |
| C  | -5.621713 | -2.356182 | 0.318274  |
| C  | -5.660235 | -0.964514 | -0.340556 |
| C  | -4.209619 | -0.751333 | -0.806598 |
| C  | 1.248402  | 1.645328  | 0.582680  |
| C  | 1.851983  | 2.455614  | -0.455627 |
| C  | 3.141831  | 2.249279  | -0.843528 |
| C  | 3.964430  | 1.220449  | -0.260176 |
| C  | 3.407606  | 0.397464  | 0.761522  |
| C  | 2.023099  | 0.579120  | 1.134989  |
| H  | -3.703087 | 4.577329  | 1.467211  |
| H  | -1.940266 | 3.073578  | 2.331309  |
| H  | -0.737425 | 2.162266  | -1.695550 |
| H  | -0.339104 | 1.335311  | 1.979085  |
| H  | -4.314690 | -1.966456 | 2.039514  |
| H  | -3.824411 | -3.381147 | 1.102120  |
| H  | -6.451330 | -2.529959 | 1.012002  |
| H  | -5.660602 | -3.137443 | -0.452440 |
| H  | -5.928157 | -0.204437 | 0.404932  |
| H  | -6.380711 | -0.894408 | -1.162767 |
| H  | -4.056210 | -1.137302 | -1.826313 |
| H  | -3.902455 | 0.298253  | -0.804227 |
| H  | 1.270173  | 3.261737  | -0.890184 |
| H  | 3.586471  | 2.890926  | -1.601848 |
| H  | 1.698650  | 0.125266  | 2.073102  |
| P  | 1.109674  | -2.185291 | -0.669741 |
| C  | 2.644531  | -2.195328 | -1.763614 |
| H  | 3.491249  | -1.767483 | -1.221354 |
| H  | 2.889694  | -3.218404 | -2.070437 |
| H  | 2.456870  | -1.588609 | -2.654620 |
| C  | 1.525135  | -3.462523 | 0.644500  |
| H  | 0.651417  | -3.564934 | 1.292932  |
| H  | 1.772113  | -4.425204 | 0.183171  |

**P4d**

SCF done: -1351.798367

|    |           |           |           |
|----|-----------|-----------|-----------|
| C  | -0.752226 | 1.510092  | -1.233584 |
| Ni | -0.639577 | -0.611852 | 0.413729  |
| O  | -1.805609 | -0.340366 | 2.821322  |
| C  | -2.040078 | -0.713821 | 1.666855  |
| O  | -1.589144 | 0.531264  | -0.684758 |
| N  | -3.249236 | -1.175472 | 1.284370  |
| C  | -3.636828 | -1.603944 | -0.071853 |
| C  | -5.167029 | -1.483505 | -0.045265 |
| C  | -5.524361 | -1.827740 | 1.412603  |
| C  | -4.390971 | -1.180517 | 2.224328  |
| C  | 0.705572  | 1.006496  | -1.230071 |
| C  | 1.134692  | 0.146779  | -2.286223 |
| C  | 2.417608  | -0.350916 | -2.328253 |
| C  | 3.359427  | -0.030486 | -1.309436 |
| C  | 2.939100  | 0.818257  | -0.232734 |
| C  | 1.605127  | 1.317224  | -0.222934 |
| H  | -3.332828 | -2.648756 | -0.240331 |
| H  | -3.155848 | -0.966270 | -0.814251 |
| H  | -5.650305 | -2.141968 | -0.774700 |
| H  | -5.460536 | -0.451354 | -0.274154 |
| H  | -5.517320 | -2.916525 | 1.554041  |
| H  | -6.510572 | -1.460110 | 1.714761  |
| H  | -4.627439 | -0.149594 | 2.517866  |
| H  | -4.134847 | -1.730434 | 3.136045  |
| H  | 0.426243  | -0.102786 | -3.073020 |
| H  | 2.730828  | -0.991064 | -3.150775 |
| H  | 1.305667  | 1.990513  | 0.576698  |
| P  | 0.596670  | -2.144123 | 1.594539  |
| C  | 1.968815  | -3.062006 | 0.690082  |
| H  | 2.699221  | -2.347966 | 0.302037  |
| H  | 2.469665  | -3.760224 | 1.369632  |
| H  | 1.542474  | -3.618145 | -0.149951 |
| C  | 1.480652  | -1.411696 | 3.080191  |
| H  | 0.737949  | -0.893595 | 3.692350  |
| H  | 1.972053  | -2.197648 | 3.664018  |
| H  | 2.228606  | -0.692828 | 2.735092  |
| C  | -0.376846 | -3.558554 | 2.361246  |
| H  | 0.294222  | -4.225898 | 2.913005  |
| H  | -1.123493 | -3.144869 | 3.043048  |
| H  | -0.885308 | -4.123927 | 1.575045  |
| C  | 3.877037  | 1.151875  | 0.784218  |
| H  | 3.560306  | 1.806367  | 1.593566  |
| C  | 4.696285  | -0.514923 | -1.323034 |
| H  | 5.013887  | -1.155139 | -2.143610 |
| C  | 5.167356  | 0.664277  | 0.744651  |
| H  | 5.874191  | 0.929656  | 1.526679  |
| C  | 5.581056  | -0.178288 | -0.318740 |
| H  | 6.600824  | -0.553911 | -0.342333 |
| H  | -1.029481 | 1.633818  | -2.297182 |
| C  | -0.903244 | 2.888471  | -0.583135 |
| C  | -1.488689 | 3.037930  | 0.678999  |

|   |           |          |           |
|---|-----------|----------|-----------|
| C | -0.460021 | 4.034334 | -1.261318 |
| C | -1.617390 | 4.306543 | 1.256677  |
| H | -1.851784 | 2.157575 | 1.198649  |
| C | -0.587094 | 5.301585 | -0.688682 |
| H | -0.010887 | 3.932987 | -2.248614 |
| C | -1.166671 | 5.441826 | 0.577945  |
| H | -2.074935 | 4.404954 | 2.238611  |
| H | -0.240268 | 6.178667 | -1.230547 |
| H | -1.271264 | 6.427197 | 1.025945  |

**File**

SCF done: -1351.795679

|    |           |           |           |
|----|-----------|-----------|-----------|
| C  | -0.920707 | 0.045629  | 0.294446  |
| Ni | 1.455039  | -1.734988 | -0.116384 |
| O  | -2.351907 | 0.186615  | 0.015018  |
| C  | -3.216211 | -0.187889 | 1.003350  |
| O  | -2.875190 | -0.618548 | 2.100951  |
| N  | -4.503588 | -0.021169 | 0.612228  |
| C  | -5.617702 | -0.398959 | 1.492032  |
| C  | -6.826827 | -0.387428 | 0.543575  |
| C  | -6.457303 | 0.689583  | -0.493026 |
| C  | -4.944986 | 0.493684  | -0.692783 |
| C  | -0.254128 | 1.355484  | -0.074446 |
| C  | -0.632436 | 2.077311  | -1.241361 |
| C  | -0.001843 | 3.254795  | -1.579160 |
| C  | 1.040886  | 3.787506  | -0.771769 |
| C  | 1.418152  | 3.074499  | 0.413164  |
| C  | 0.745988  | 1.863191  | 0.730898  |
| H  | -5.729180 | 0.333618  | 2.303816  |
| H  | -5.427418 | -1.373817 | 1.949955  |
| H  | -7.764812 | -0.177336 | 1.067285  |
| H  | -6.927096 | -1.363923 | 0.052816  |
| H  | -6.654227 | 1.688698  | -0.083888 |
| H  | -7.014633 | 0.596293  | -1.430656 |
| H  | -4.730771 | -0.235921 | -1.485952 |
| H  | -4.422473 | 1.421788  | -0.942015 |
| H  | -1.437575 | 1.694284  | -1.860945 |
| H  | -0.301776 | 3.796851  | -2.473770 |
| H  | 1.034104  | 1.328581  | 1.633809  |
| P  | 3.577425  | -1.914581 | 0.490599  |
| C  | 4.517381  | -3.500236 | 0.065617  |
| H  | 4.504404  | -3.648018 | -1.018126 |
| H  | 5.555717  | -3.446766 | 0.413663  |
| H  | 4.019015  | -4.353087 | 0.535600  |
| C  | 4.767550  | -0.614862 | -0.196057 |
| H  | 4.418472  | 0.381848  | 0.088297  |
| H  | 5.783158  | -0.771039 | 0.186657  |
| H  | 4.777092  | -0.676127 | -1.288191 |
| C  | 3.950523  | -1.779418 | 2.339993  |
| H  | 5.027905  | -1.854421 | 2.528850  |
| H  | 3.582941  | -0.819675 | 2.714264  |
| H  | 3.430091  | -2.579409 | 2.874292  |
| C  | 2.448394  | 3.608745  | 1.236564  |
| H  | 2.728281  | 3.071509  | 2.140448  |
| C  | 1.711657  | 5.000996  | -1.088286 |
| H  | 1.422558  | 5.540209  | -1.988051 |
| C  | 3.081587  | 4.787543  | 0.902528  |
| H  | 3.867246  | 5.184116  | 1.540681  |
| C  | 2.710289  | 5.490572  | -0.272511 |
| H  | 3.215250  | 6.419237  | -0.526047 |
| H  | -0.823944 | -0.120623 | 1.368676  |
| C  | -0.414129 | -1.192211 | -0.430411 |
| C  | 0.103970  | -1.176870 | -1.762965 |
| C  | -0.620370 | -2.474377 | 0.172130  |
| C  | 0.239631  | -2.371970 | -2.497426 |
| H  | 0.297597  | -0.229206 | -2.255527 |
| C  | -0.479871 | -3.657892 | -0.576831 |
| H  | -1.010219 | -2.521479 | 1.185243  |
| C  | -0.083149 | -3.607810 | -1.920659 |
| H  | 0.598615  | -2.324948 | -3.522732 |
| H  | -0.685957 | -4.614000 | -0.101997 |

|   |          |           |           |
|---|----------|-----------|-----------|
| H | 0.009003 | -4.522899 | -2.499662 |
|---|----------|-----------|-----------|

**TS<sub>5e</sub>**

SCF done: -1351.7625643

|    |           |           |           |
|----|-----------|-----------|-----------|
| C  | 0.082152  | -0.513921 | 0.327622  |
| Ni | -1.807965 | -1.584274 | 0.243769  |
| O  | 2.280975  | -0.175911 | 0.543526  |
| C  | 2.845644  | -0.502372 | -0.573035 |
| O  | 2.289949  | -1.108992 | -1.531580 |
| N  | 4.177161  | -0.146012 | -0.693095 |
| C  | 4.995493  | -0.525375 | -1.844788 |
| C  | 6.432168  | -0.267751 | -1.357354 |
| C  | 6.263201  | 0.880607  | -0.344729 |
| C  | 4.934085  | 0.542261  | 0.352173  |
| C  | -0.261994 | 0.861937  | 0.700773  |
| C  | -0.220033 | 1.331844  | 2.050028  |
| C  | -0.536144 | 2.633596  | 2.356429  |
| C  | -0.908410 | 3.562627  | 1.343532  |
| C  | -0.911682 | 3.118192  | -0.020273 |
| C  | -0.577313 | 1.770513  | -0.303185 |
| H  | 4.750644  | 0.092789  | -2.722912 |
| H  | 4.812405  | -1.568057 | -2.124579 |
| H  | 7.118854  | -0.026013 | -2.176412 |
| H  | 6.820379  | -1.159843 | -0.847793 |
| H  | 6.174444  | 1.837714  | -0.875840 |
| H  | 7.099220  | 0.964717  | 0.358684  |
| H  | 5.092426  | -0.112313 | 1.224029  |
| H  | 4.394426  | 1.426804  | 0.706248  |
| H  | 0.120429  | 0.661733  | 2.832168  |
| H  | -0.482038 | 2.977611  | 3.387202  |
| H  | -0.550385 | 1.447480  | -1.341908 |
| P  | -3.075582 | -1.212531 | -1.587862 |
| C  | -4.333709 | -2.546461 | -2.030487 |
| H  | -5.046633 | -2.667483 | -1.209833 |
| H  | -4.875152 | -2.275611 | -2.943614 |
| H  | -3.815766 | -3.497199 | -2.185145 |
| C  | -4.141484 | 0.340879  | -1.590628 |
| H  | -3.507390 | 1.215109  | -1.421032 |
| H  | -4.667659 | 0.447516  | -2.545702 |
| H  | -4.872064 | 0.282345  | -0.778645 |
| C  | -2.115021 | -1.045571 | -3.199426 |
| H  | -2.798847 | -0.861367 | -4.035383 |
| H  | -1.402811 | -0.220610 | -3.120407 |
| H  | -1.550044 | -1.963659 | -3.381553 |
| C  | -1.246720 | 4.048986  | -1.044734 |
| H  | -1.234547 | 3.715896  | -2.080558 |
| C  | -1.248171 | 4.911723  | 1.628597  |
| H  | -1.241540 | 5.246751  | 2.663675  |
| C  | -1.573828 | 5.352509  | -0.735869 |
| H  | -1.825844 | 6.053331  | -1.527632 |
| C  | -1.577070 | 5.788100  | 0.614089  |
| H  | -1.834382 | 6.818369  | 0.846069  |
| H  | 0.426051  | -0.679167 | -0.690720 |
| C  | -0.014516 | -1.699563 | 1.161274  |
| C  | -1.006870 | -1.791620 | 2.190419  |
| C  | 0.689347  | -2.887726 | 0.790993  |
| C  | -1.241310 | -3.032098 | 2.834162  |
| H  | -1.481924 | -0.899519 | 2.589641  |
| C  | 0.452419  | -4.079620 | 1.449638  |
| H  | 1.425768  | -2.807107 | -0.004051 |
| C  | -0.519873 | -4.159221 | 2.473430  |
| H  | -1.978616 | -3.083595 | 3.631358  |
| H  | 1.015308  | -4.967354 | 1.172581  |
| H  | -0.697646 | -5.105188 | 2.978660  |

**F<sub>2e</sub>**

SCF done: -1351.370389

|    |           |           |           |
|----|-----------|-----------|-----------|
| C  | 1.007048  | -1.025458 | -0.305018 |
| Ni | -1.838807 | -0.230426 | -0.211888 |
| O  | 2.378353  | -0.583899 | -0.070436 |
| C  | 3.031584  | -0.012479 | -1.125286 |





|                        |           |           |           |                        |           |           |           |
|------------------------|-----------|-----------|-----------|------------------------|-----------|-----------|-----------|
| H                      | 6.289215  | 2.280519  | -0.257728 | H                      | 1.099442  | -0.346214 | 0.794375  |
| H                      | 7.198105  | 1.151000  | 0.761350  | H                      | 2.897805  | -0.103535 | 2.448812  |
| H                      | 5.189341  | -0.116233 | 1.301690  | H                      | 5.199819  | -0.620045 | 3.210587  |
| H                      | 4.481657  | 1.495527  | 1.140666  | H                      | 6.663572  | -2.116087 | 1.853506  |
| H                      | -0.030795 | 0.572547  | 2.808480  | H                      | 5.829500  | -3.086458 | -0.265080 |
| H                      | -1.118852 | 2.713667  | 3.328995  | H                      | -0.190440 | -0.987136 | -2.527525 |
| H                      | -0.252911 | 1.490255  | -1.408365 | H                      | 2.344327  | 3.591569  | 0.693187  |
| P                      | -3.034376 | -1.785761 | -1.206463 | H                      | 0.879180  | 4.410759  | 1.245483  |
| C                      | -3.950359 | -2.857712 | 0.041717  | H                      | 2.727234  | 5.796314  | -0.271128 |
| H                      | -4.689196 | -2.250648 | 0.572839  | H                      | 0.992581  | 6.061504  | -0.516808 |
| H                      | -4.456231 | -3.687227 | -0.464206 | H                      | 2.800727  | 4.160437  | -2.105262 |
| H                      | -3.232859 | -3.252232 | 0.765814  | H                      | 1.728608  | 5.404094  | -2.771623 |
| C                      | -4.406223 | -1.353216 | -2.427514 | H                      | -0.254159 | 4.093416  | -2.255913 |
| H                      | -3.976465 | -0.840236 | -3.292600 | H                      | 0.881438  | 2.772263  | -2.560704 |
| H                      | -4.919782 | -2.260722 | -2.763631 | H                      | -2.239986 | -2.225054 | -3.070166 |
| H                      | -5.128189 | -0.685124 | -1.949178 | H                      | -4.279226 | -3.378602 | -2.287781 |
| C                      | -2.040129 | -3.061345 | -2.170020 | H                      | -4.558476 | -3.960587 | 0.120636  |
| H                      | -2.695931 | -3.856503 | -2.541606 | H                      | -2.796619 | -3.336755 | 1.754462  |
| H                      | -1.542040 | -2.573543 | -3.012403 | H                      | -0.690828 | -2.281181 | 0.972176  |
| H                      | -1.274989 | -3.490211 | -1.517383 | P                      | -2.915181 | 0.738169  | 1.137803  |
| C                      | -1.682791 | 3.795395  | -1.127037 | C                      | -4.692852 | 0.108260  | 1.116693  |
| H                      | -1.501366 | 3.523324  | -2.164435 | H                      | -4.708531 | -0.968837 | 1.301871  |
| C                      | -2.120117 | 4.501764  | 1.550632  | H                      | -5.290889 | 0.618051  | 1.880324  |
| H                      | -2.278213 | 4.780352  | 2.590283  | H                      | -5.132391 | 0.295578  | 0.132258  |
| C                      | -2.296841 | 4.996841  | -0.815931 | C                      | -2.459919 | 0.607216  | 2.957520  |
| H                      | -2.602662 | 5.672805  | -1.610181 | H                      | -1.465809 | 1.044725  | 3.075352  |
| C                      | -2.522145 | 5.350214  | 0.532272  | H                      | -3.187210 | 1.140315  | 3.580124  |
| H                      | -3.003016 | 6.295491  | 0.770028  | H                      | -2.430517 | -0.444699 | 3.257489  |
| H                      | 0.643383  | -0.585993 | -0.792181 | C                      | -3.180702 | 2.585945  | 0.923419  |
| C                      | 0.199432  | -1.791184 | 0.961315  | H                      | -3.958524 | 2.940385  | 1.608952  |
| C                      | -0.620207 | -2.032335 | 2.081916  | H                      | -2.240121 | 3.097933  | 1.134182  |
| C                      | 0.996485  | -2.852022 | 0.477531  | H                      | -3.476273 | 2.793650  | -0.108545 |
| C                      | -0.626364 | -3.280969 | 2.709173  |                        |           |           |           |
| H                      | -1.276269 | -1.252860 | 2.455465  | <b>#5</b>              |           |           |           |
| C                      | 0.985053  | -4.096731 | 1.102274  | SCF done: -1953.224626 |           |           |           |
| H                      | 1.642012  | -2.662564 | -0.375782 | C                      | -4.695204 | -0.594279 | 0.576363  |
| C                      | 0.176852  | -4.317503 | 2.225281  | C                      | -5.374847 | 0.053098  | -0.506596 |
| H                      | -1.262576 | -3.442831 | 3.576201  | C                      | -4.678569 | 0.210249  | -1.736411 |
| H                      | 1.617024  | -4.895153 | 0.721140  | C                      | -3.390581 | -0.249464 | -1.886185 |
| H                      | 0.174427  | -5.286961 | 2.717362  | C                      | -2.697697 | -0.910994 | -0.824814 |
|                        |           |           |           | C                      | -3.366451 | -1.058276 | 0.382053  |
|                        |           |           |           | C                      | -5.378534 | -0.749656 | 1.815986  |
| <b>#4e</b>             |           |           |           | C                      | -6.669063 | -0.290672 | 1.976558  |
| SCF done: -1351.829563 |           |           |           | C                      | -7.340454 | 0.348153  | 0.902269  |
| C                      | 3.028488  | -1.311730 | 0.656815  | C                      | -6.704699 | 0.514942  | -0.310753 |
| C                      | 3.873802  | -2.161532 | -0.127254 | Ni                     | -0.111684 | -0.211594 | -0.024963 |
| C                      | 3.357991  | -2.685172 | -1.345583 | C                      | 1.738637  | -2.999710 | 1.347330  |
| C                      | 2.076821  | -2.391846 | -1.754226 | C                      | 1.477699  | -0.606690 | 3.000518  |
| C                      | 1.213417  | -1.564096 | -0.970822 | C                      | -0.762137 | -2.431248 | 2.741076  |
| C                      | 1.706616  | -1.032426 | 0.208048  | P                      | 0.553584  | -1.587323 | 1.693499  |
| C                      | 3.538792  | -0.760724 | 1.865548  | O                      | 0.848010  | 1.785888  | 0.392240  |
| C                      | 4.821465  | -1.047237 | 2.285165  | N                      | -0.491046 | 3.461303  | -0.537444 |
| C                      | 5.654771  | -1.896483 | 1.512670  | C                      | -0.085479 | 2.194877  | -0.455989 |
| C                      | 5.190528  | -2.438526 | 0.331757  | O                      | -0.662107 | 1.286660  | -1.144332 |
| C                      | -0.173380 | -1.312664 | -1.485181 | C                      | -1.523507 | 3.859720  | -1.515017 |
| Ni                     | -1.343444 | -0.206130 | -0.333035 | C                      | -1.798189 | 5.331165  | -1.166793 |
| O                      | -0.626723 | 1.441675  | -0.957283 | C                      | -0.467823 | 5.812615  | -0.560475 |
| C                      | 0.024272  | 2.121967  | -0.050526 | C                      | 0.013058  | 4.602643  | 0.250297  |
| O                      | 0.101103  | 1.814031  | 1.163580  | C                      | -1.296385 | -1.387849 | -1.075173 |
| N                      | 0.634224  | 3.259914  | -0.516209 | C                      | -1.016162 | -2.858174 | -1.092202 |
| C                      | 1.441790  | 4.120299  | 0.352297  | C                      | 0.097854  | -3.319106 | -1.828332 |
| C                      | 1.790258  | 5.308121  | -0.559537 | C                      | 0.400202  | -4.676161 | -1.927333 |
| C                      | 1.841395  | 4.674514  | -1.962378 | C                      | -0.406077 | -5.626635 | -1.288942 |
| C                      | 0.697241  | 3.646492  | -1.929241 | C                      | -1.522243 | -5.193979 | -0.568576 |
| C                      | -1.303364 | -2.141695 | -1.111937 | C                      | -1.825522 | -3.831878 | -0.475491 |
| C                      | -2.364795 | -2.464437 | -2.016955 | C                      | 5.188837  | -1.212337 | -0.128165 |
| C                      | -3.502519 | -3.108915 | -1.576267 | C                      | 5.418354  | -0.242300 | 0.857286  |
| C                      | -3.665883 | -3.433736 | -0.206724 | C                      | 4.534410  | 0.827613  | 1.000347  |
| C                      | -2.687155 | -3.081172 | 0.703151  | C                      | 3.384330  | 0.976218  | 0.197346  |
| C                      | -1.515551 | -2.407878 | 0.274041  | C                      | 3.193953  | -0.009959 | -0.784797 |
| H                      | 3.993735  | -3.324016 | -1.955730 | B                      | 2.464384  | 2.311366  | 0.226713  |
| H                      | 1.702400  | -2.802976 | -2.689464 |                        |           |           |           |



|    |           |           |           |                        |           |           |           |
|----|-----------|-----------|-----------|------------------------|-----------|-----------|-----------|
| C  | 4.171874  | -0.558858 | -1.413181 | H                      | -3.002074 | -0.091420 | 1.202312  |
| C  | 4.556942  | 0.806461  | -1.622422 | H                      | -4.389110 | 3.188191  | -1.492690 |
| C  | 3.891394  | 1.809011  | -0.865189 | H                      | -4.132603 | 1.533106  | -2.108948 |
| C  | 2.904904  | 1.479965  | 0.036162  | H                      | -3.184702 | 2.887076  | -2.781602 |
| C  | 2.493705  | 0.126505  | 0.261834  | H                      | 0.362237  | 1.072403  | -3.782316 |
| C  | 3.147805  | -0.855344 | -0.475846 | H                      | 0.352705  | -0.014278 | -2.364168 |
| C  | 4.834371  | -1.574228 | -2.161922 | H                      | 1.083075  | 1.601287  | -2.237033 |
| C  | 5.823621  | -1.256643 | -3.068749 | H                      | -1.864191 | -0.965476 | -2.854374 |
| C  | 6.201829  | 0.095572  | -3.273478 | C                      | -4.476043 | -1.061850 | 0.001223  |
| C  | 5.580079  | 1.102032  | -2.563234 | H                      | -5.205828 | -1.058600 | 0.804725  |
| Ni | -0.321765 | -0.439312 | 0.164610  | O                      | -5.991826 | -2.152681 | -1.590811 |
| C  | -1.798692 | -3.625965 | 0.357160  | C                      | -7.015032 | -2.199079 | -0.605351 |
| C  | 0.164887  | -3.262905 | -1.793742 | H                      | -7.870309 | -2.675620 | -1.088134 |
| C  | 0.998926  | -3.816838 | 0.924029  | H                      | -6.707117 | -2.795562 | 0.263673  |
| P  | -0.197733 | -2.716623 | -0.027775 | H                      | -7.297073 | -1.191049 | -0.274116 |
| O  | -0.592136 | 1.595130  | 0.054814  |                        |           |           |           |
| N  | -0.715825 | 3.545908  | 1.257233  |                        |           |           |           |
| C  | -0.968692 | 2.223417  | 1.244772  | <b>P7</b>              |           |           |           |
| O  | -1.411528 | 1.583249  | 2.186443  | SCF done: -1953.227222 |           |           |           |
| C  | -1.037361 | 4.348674  | 2.448936  | C                      | 3.161699  | 1.881847  | -1.605092 |
| C  | -0.384569 | 5.703625  | 2.142445  | C                      | 2.979435  | 3.156386  | -0.971393 |
| C  | -0.478679 | 5.802957  | 0.609232  | C                      | 2.470729  | 3.172182  | 0.356068  |
| C  | -0.221737 | 4.363222  | 0.133095  | C                      | 2.161585  | 2.002129  | 1.011181  |
| C  | 1.394611  | -0.144696 | 1.236038  | C                      | 2.324582  | 0.714520  | 0.403512  |
| C  | 1.662529  | -1.022487 | 2.424156  | C                      | 2.823650  | 0.699194  | -0.897122 |
| C  | 0.641898  | -1.176864 | 3.389606  | C                      | 3.672451  | 1.853812  | -2.935591 |
| C  | 0.833129  | -1.946277 | 4.536471  | C                      | 3.984691  | 3.019779  | -3.603173 |
| C  | 2.058683  | -2.586690 | 4.765356  | C                      | 3.804115  | 4.278319  | -2.972565 |
| C  | 3.088774  | -2.422681 | 3.836512  | C                      | 3.312507  | 4.339630  | -1.684229 |
| C  | 2.894615  | -1.649895 | 2.686277  | Ni                     | 0.153949  | -1.116137 | 0.249515  |
| C  | -4.787392 | -1.595773 | -1.257664 | C                      | 0.149395  | -4.486558 | -0.430077 |
| C  | -3.823510 | -1.560493 | -2.277843 | C                      | 0.462962  | -2.822051 | -2.818841 |
| C  | -2.567880 | -1.009920 | -2.024806 | C                      | 2.717017  | -3.374860 | -1.132913 |
| C  | -2.197224 | -0.471584 | -0.769005 | P                      | 0.909288  | -2.858081 | -0.988492 |
| C  | -3.204049 | -0.519706 | 0.222306  | O                      | -1.232325 | 1.957119  | 0.149762  |
| B  | -1.531970 | 1.556077  | -1.077557 | N                      | -1.634648 | 2.062623  | 2.405125  |
| O  | -2.673812 | 2.304943  | -0.845599 | C                      | -1.208888 | 1.342823  | 1.354734  |
| C  | -3.641495 | 2.483864  | -1.869902 | O                      | -0.737954 | 0.204353  | 1.493822  |
| O  | -0.997940 | 1.572597  | -2.355241 | C                      | -1.558191 | 1.523694  | 3.775763  |
| C  | 0.266661  | 1.030801  | -2.692877 | C                      | -1.763003 | 2.766167  | 4.653824  |
| H  | 4.180963  | 2.849454  | -1.002406 | C                      | -2.665094 | 3.668424  | 3.792908  |
| H  | 2.421714  | 2.266197  | 0.611075  | C                      | -2.146189 | 3.445902  | 2.362996  |
| H  | 2.876105  | -1.899054 | -0.344518 | C                      | 1.932830  | -0.512030 | 1.154590  |
| H  | 4.549106  | -2.612709 | -2.003971 | C                      | 2.991700  | -1.499585 | 1.527025  |
| H  | 6.319881  | -2.044336 | -3.630354 | C                      | 2.653603  | -2.559250 | 2.401731  |
| H  | 6.983756  | 0.334266  | -3.989822 | C                      | 3.591551  | -3.503326 | 2.815978  |
| H  | 5.868420  | 2.140508  | -2.714390 | C                      | 4.919336  | -3.425402 | 2.372629  |
| H  | -1.652971 | -4.699526 | 0.194453  | C                      | 5.282026  | -2.373215 | 1.527652  |
| H  | -2.603795 | -3.259984 | -0.280165 | C                      | 4.338037  | -1.426558 | 1.116317  |
| H  | -2.065501 | -3.451608 | 1.403019  | C                      | -4.341087 | -2.018953 | -1.262209 |
| H  | 1.134573  | -2.865006 | -2.105221 | C                      | -3.469794 | -1.303525 | -2.093347 |
| H  | -0.608924 | -2.881508 | -2.461807 | C                      | -2.151252 | -1.071145 | -1.688776 |
| H  | 0.185223  | -4.356637 | -1.848951 | C                      | -1.637298 | -1.534315 | -0.460218 |
| H  | 0.816415  | -4.854923 | 0.624945  | C                      | -2.543972 | -2.241356 | 0.346652  |
| H  | 0.834822  | -3.710493 | 1.997661  | B                      | -2.340288 | 2.139209  | -0.681910 |
| H  | 2.035155  | -3.556569 | 0.707806  | O                      | -3.583286 | 1.951753  | -0.164969 |
| H  | -0.647338 | 3.862249  | 3.347104  | C                      | -4.754055 | 2.034868  | -0.983213 |
| H  | -2.127090 | 4.432789  | 2.559108  | O                      | -2.138792 | 2.574299  | -1.950332 |
| H  | 0.666334  | 5.695078  | 2.458536  | C                      | -0.830205 | 2.796024  | -2.489665 |
| H  | -0.882896 | 6.530170  | 2.658571  | H                      | 2.340376  | 4.130538  | 0.856628  |
| H  | 0.233146  | 6.513222  | 0.176786  | H                      | 1.794762  | 2.042903  | 2.034898  |
| H  | -1.487631 | 6.116926  | 0.314225  | H                      | 2.956196  | -0.252397 | -1.406885 |
| H  | -0.755983 | 4.123573  | -0.787988 | H                      | 3.816137  | 0.889691  | -3.420016 |
| H  | 0.847604  | 4.174624  | -0.028677 | H                      | 4.374500  | 2.978034  | -4.617465 |
| H  | 1.045725  | 0.808823  | 1.641185  | H                      | 4.057401  | 5.190948  | -3.506221 |
| H  | -0.306880 | -0.668738 | 3.231549  | H                      | 3.176388  | 5.301935  | -1.193667 |
| H  | 0.025422  | -2.041668 | 5.259190  | H                      | 0.480276  | -5.297893 | -1.087709 |
| H  | 2.209722  | -3.187858 | 5.658538  | H                      | -0.939109 | -4.406124 | -0.453917 |
| H  | 4.055622  | -2.891684 | 4.007487  | H                      | 0.473412  | -4.698537 | 0.592909  |
| H  | 3.720223  | -1.523439 | 1.992258  | H                      | 0.914966  | -1.942848 | -3.287908 |
| H  | -4.085271 | -1.953746 | -3.257092 | H                      | -0.619666 | -2.771490 | -2.939094 |
|    |           |           |           | H                      | 0.848304  | -3.725367 | -3.303904 |

|   |           |           |           |                        |           |           |           |
|---|-----------|-----------|-----------|------------------------|-----------|-----------|-----------|
| H | 2.780527  | -4.215005 | -1.833466 | H                      | 4.270495  | 0.087118  | 0.801832  |
| H | 3.107979  | -3.678935 | -0.161792 | H                      | 4.470699  | -1.632320 | 0.395471  |
| H | 3.324095  | -2.547698 | -1.506938 | H                      | 1.204655  | -0.343307 | 3.631042  |
| H | -0.597344 | 1.026735  | 3.931200  | H                      | 2.187765  | 0.906850  | 2.842390  |
| H | -2.349893 | 0.777880  | 3.924624  | H                      | 2.972553  | -0.322545 | 3.883632  |
| H | -0.800010 | 3.258504  | 4.838528  | H                      | 3.261923  | -2.984041 | 3.197365  |
| H | -2.203661 | 2.518493  | 5.624303  | H                      | 2.682285  | -3.695906 | 1.662688  |
| H | -2.626164 | 4.722483  | 4.084537  | H                      | 1.514420  | -3.192671 | 2.900577  |
| H | -3.708609 | 3.337801  | 3.865033  | H                      | -0.134586 | -0.120897 | -2.373075 |
| H | -2.931796 | 3.544126  | 1.611787  | H                      | 0.996556  | -1.897007 | -3.397179 |
| H | -1.330739 | 4.138134  | 2.114545  | H                      | 1.953710  | -4.167691 | -3.331431 |
| H | 1.441147  | -0.217243 | 2.087459  | H                      | 1.489226  | -5.681982 | -1.399520 |
| H | 1.626202  | -2.632965 | 2.755833  | H                      | 0.047827  | -4.881651 | 0.460786  |
| H | 3.288322  | -4.303103 | 3.489010  | H                      | -0.998274 | -2.656319 | 0.362278  |
| H | 5.653895  | -4.160861 | 2.690875  | H                      | 0.340675  | 4.114150  | 1.105467  |
| H | 6.311800  | -2.280326 | 1.187861  | H                      | 2.932709  | 0.826209  | -1.541962 |
| H | 4.656274  | -0.612207 | 0.471933  | H                      | -0.294031 | 1.730037  | 1.171965  |
| H | -3.838274 | -0.940749 | -3.050486 | C                      | 2.711271  | 2.880740  | -0.988074 |
| H | -2.222445 | -2.618104 | 1.318225  | H                      | 3.543925  | 3.185853  | -1.614393 |
| H | -5.607748 | 2.152263  | -0.310920 | O                      | 2.246980  | 5.165773  | -0.208812 |
| H | -4.868911 | 1.112087  | -1.559112 | C                      | 3.310577  | 5.662075  | -1.002384 |
| H | -4.697613 | 2.889294  | -1.665340 | H                      | 3.332200  | 6.741006  | -0.834255 |
| H | -0.928318 | 2.797327  | -3.577733 | H                      | 4.274975  | 5.228513  | -0.701645 |
| H | -0.133198 | 2.013554  | -2.178088 | H                      | 3.143251  | 5.463859  | -2.070367 |
| H | -0.445407 | 3.766412  | -2.159408 |                        |           |           |           |
| H | -1.510143 | -0.513231 | -2.371456 |                        |           |           |           |
| C | -3.875103 | -2.490515 | -0.029782 | <b>P<sub>9</sub></b>   |           |           |           |
| H | -4.525385 | -3.043076 | 0.641831  | SCF done: -2057.322346 |           |           |           |
| O | -5.621940 | -2.195785 | -1.737767 | C                      | -1.616737 | 3.685060  | 0.363820  |
| C | -6.534570 | -2.936007 | -0.945139 | C                      | -0.826837 | 3.963698  | -0.801067 |
| H | -7.468716 | -2.963792 | -1.510426 | C                      | -0.976137 | 3.106062  | -1.930104 |
| H | -6.180974 | -3.962772 | -0.776475 | C                      | -1.848556 | 2.042860  | -1.900101 |
| H | -6.711566 | -2.451974 | 0.025639  | C                      | -2.652446 | 1.748669  | -0.749549 |
|   |           |           |           | C                      | -2.512541 | 2.578700  | 0.354997  |
|   |           |           |           | C                      | -1.481217 | 4.537648  | 1.497179  |
|   |           |           |           | C                      | -0.608534 | 5.606013  | 1.479227  |
|   |           |           |           | C                      | 0.174073  | 5.875246  | 0.327429  |
|   |           |           |           | C                      | 0.065916  | 5.069355  | -0.787600 |
|   |           |           |           | Ni                     | -2.617032 | -1.087264 | -0.548737 |
|   |           |           |           | C                      | -2.595854 | -3.583047 | -2.867128 |
|   |           |           |           | C                      | -5.052622 | -3.404385 | -1.251539 |
|   |           |           |           | C                      | -4.650928 | -1.579430 | -3.523961 |
|   |           |           |           | P                      | -3.741795 | -2.333200 | -2.064861 |
|   |           |           |           | O                      | -1.592334 | -2.662321 | 0.145166  |
|   |           |           |           | N                      | -0.175316 | -2.340222 | 1.916402  |
|   |           |           |           | C                      | -1.020579 | -1.873441 | 0.987572  |
|   |           |           |           | O                      | -1.308208 | -0.606852 | 0.904667  |
|   |           |           |           | C                      | 0.484278  | -1.506846 | 2.941261  |
|   |           |           |           | C                      | 1.014471  | -2.551296 | 3.935841  |
|   |           |           |           | C                      | 1.333672  | -3.762164 | 3.039528  |
|   |           |           |           | C                      | 0.188447  | -3.764029 | 2.013692  |
|   |           |           |           | C                      | -3.602730 | 0.597380  | -0.841179 |
|   |           |           |           | C                      | -4.742985 | 0.507613  | 0.132119  |
|   |           |           |           | C                      | -6.070140 | 0.613907  | -0.329449 |
|   |           |           |           | C                      | -7.159709 | 0.492898  | 0.537346  |
|   |           |           |           | C                      | -6.950295 | 0.263900  | 1.900175  |
|   |           |           |           | C                      | -5.640526 | 0.157746  | 2.380267  |
|   |           |           |           | C                      | -4.553472 | 0.274136  | 1.511055  |
|   |           |           |           | C                      | 7.873746  | -0.817354 | -0.467785 |
|   |           |           |           | C                      | 7.150777  | -1.247545 | 0.651887  |
|   |           |           |           | C                      | 5.816779  | -0.866003 | 0.805226  |
|   |           |           |           | C                      | 5.145471  | -0.048718 | -0.126165 |
|   |           |           |           | C                      | 5.903673  | 0.356698  | -1.236920 |
|   |           |           |           | B                      | 3.577858  | 0.383623  | 0.000560  |
|   |           |           |           | O                      | 3.321490  | 1.787331  | -0.438282 |
|   |           |           |           | C                      | 4.001748  | 2.824977  | 0.220723  |
|   |           |           |           | O                      | 2.655187  | -0.383727 | -0.865176 |
|   |           |           |           | C                      | 2.786077  | -1.782493 | -0.919000 |
|   |           |           |           | H                      | -0.384871 | 3.302941  | -2.821943 |
|   |           |           |           | H                      | -1.944163 | 1.405031  | -2.776557 |
|   |           |           |           | H                      | -3.116779 | 2.408935  | 1.240919  |
|   |           |           |           | H                      | -2.083776 | 4.334013  | 2.379838  |

  

|                        |           |           |           |  |  |  |  |
|------------------------|-----------|-----------|-----------|--|--|--|--|
| <b>P<sub>8</sub></b>   |           |           |           |  |  |  |  |
| SCF done: -1297.386291 |           |           |           |  |  |  |  |
| C                      | -3.671569 | 0.097553  | 0.543907  |  |  |  |  |
| C                      | -4.430116 | 0.826321  | -0.428850 |  |  |  |  |
| C                      | -3.841319 | 1.050585  | -1.703425 |  |  |  |  |
| C                      | -2.587375 | 0.569092  | -1.999305 |  |  |  |  |
| C                      | -1.816140 | -0.176691 | -1.052013 |  |  |  |  |
| C                      | -2.375955 | -0.376991 | 0.203622  |  |  |  |  |
| C                      | -4.241902 | -0.117246 | 1.830782  |  |  |  |  |
| C                      | -5.499951 | 0.357285  | 2.137961  |  |  |  |  |
| C                      | -6.251097 | 1.073373  | 1.170805  |  |  |  |  |
| C                      | -5.724078 | 1.301912  | -0.083624 |  |  |  |  |
| Ni                     | 0.888704  | -0.809475 | -0.061956 |  |  |  |  |
| C                      | 4.174067  | -0.932737 | 1.182498  |  |  |  |  |
| C                      | 2.170849  | -0.138600 | 3.160098  |  |  |  |  |
| C                      | 2.474797  | -2.950998 | 2.435771  |  |  |  |  |
| P                      | 2.375929  | -1.239909 | 1.648134  |  |  |  |  |
| C                      | -0.472649 | -0.655619 | -1.485295 |  |  |  |  |
| C                      | -0.058606 | -2.062354 | -1.509794 |  |  |  |  |
| C                      | 0.794288  | -2.547513 | -2.549521 |  |  |  |  |
| C                      | 1.332379  | -3.820639 | -2.508986 |  |  |  |  |
| C                      | 1.072948  | -4.678162 | -1.416890 |  |  |  |  |
| C                      | 0.273479  | -4.227838 | -0.378648 |  |  |  |  |
| C                      | -0.277831 | -2.927327 | -0.402195 |  |  |  |  |
| C                      | 1.986710  | 3.814539  | -0.240572 |  |  |  |  |
| C                      | 0.907209  | 3.378014  | 0.540365  |  |  |  |  |
| C                      | 0.565812  | 2.024650  | 0.572883  |  |  |  |  |
| C                      | 1.286002  | 1.054467  | -0.153062 |  |  |  |  |
| C                      | 2.351140  | 1.521551  | -0.937010 |  |  |  |  |
| H                      | -4.399490 | 1.612597  | -2.449700 |  |  |  |  |
| H                      | -2.161019 | 0.754581  | -2.982425 |  |  |  |  |
| H                      | -1.809754 | -0.878954 | 0.983471  |  |  |  |  |
| H                      | -3.666967 | -0.667093 | 2.573646  |  |  |  |  |
| H                      | -5.921353 | 0.183065  | 3.124968  |  |  |  |  |
| H                      | -7.242034 | 1.442325  | 1.422869  |  |  |  |  |
| H                      | -6.294997 | 1.853455  | -0.827948 |  |  |  |  |
| H                      | 4.826532  | -1.066117 | 2.052428  |  |  |  |  |

|   |           |           |           |   |           |           |           |
|---|-----------|-----------|-----------|---|-----------|-----------|-----------|
| H | -0.517611 | 6.247624  | 2.351953  | C | -4.753808 | -0.354024 | 1.166774  |
| H | 0.861167  | 6.717109  | 0.327056  | C | -4.111649 | -1.512253 | 1.641010  |
| H | 0.667051  | 5.268808  | -1.671934 | C | -3.033063 | -2.045026 | 0.943437  |
| H | -3.164013 | -4.295958 | -3.474029 | C | -2.537219 | -1.469348 | -0.252185 |
| H | -2.053591 | -4.108284 | -2.077401 | C | -3.201235 | -0.303773 | -0.686828 |
| H | -1.871474 | -3.060656 | -3.498364 | B | -1.539953 | -2.306022 | -1.289093 |
| H | -5.833556 | -2.764099 | -0.832442 | O | -2.180812 | -2.502638 | -2.576526 |
| H | -4.587792 | -3.970698 | -0.440133 | C | -3.093669 | -3.566022 | -2.733388 |
| H | -5.492392 | -4.096104 | -1.978358 | O | -1.058259 | -3.544612 | -0.728257 |
| H | -5.098340 | -2.367605 | -4.138419 | C | -0.014256 | -3.546944 | 0.211810  |
| H | -3.951890 | -1.001150 | -4.134855 | H | 4.209459  | -2.796708 | -1.769807 |
| H | -5.440986 | -0.914717 | -3.165351 | H | 2.399151  | -1.326353 | -2.527230 |
| H | -0.237488 | -0.814170 | 3.385478  | H | 2.688609  | 0.957713  | 1.105874  |
| H | 1.308414  | -0.935693 | 2.495336  | H | 4.349189  | 0.351062  | 2.820058  |
| H | 0.236666  | -2.813232 | 4.664933  | H | 6.169870  | -1.128110 | 3.598687  |
| H | 1.886396  | -2.186042 | 4.486937  | H | 6.947066  | -3.022577 | -2.173980 |
| H | 1.393512  | -4.704838 | 3.592707  | H | 5.898854  | -3.432333 | -0.030734 |
| H | 2.291507  | -3.606490 | 2.529523  | H | -2.099215 | 3.556582  | 1.855244  |
| H | 0.483071  | -4.151059 | 1.034145  | H | -2.821179 | 2.552277  | 0.564444  |
| H | -0.673514 | -4.348735 | 2.362734  | H | -1.471604 | 3.654903  | 0.184274  |
| H | -3.997682 | 0.581863  | -1.861483 | H | -0.725422 | 0.006121  | 3.175452  |
| H | -6.248607 | 0.814317  | -1.384624 | H | -2.354946 | 0.266036  | 2.524062  |
| H | -8.171196 | 0.586761  | 0.148580  | H | -1.617429 | 1.497552  | 3.591272  |
| H | -7.794394 | 0.171005  | 2.578674  | H | 0.296593  | 3.246090  | 2.868568  |
| H | -5.462776 | -0.024366 | 3.437735  | H | 1.279580  | 3.145980  | 1.381437  |
| H | -3.543684 | 0.165255  | 1.896904  | H | 1.402103  | 1.873909  | 2.627192  |
| H | 7.648388  | -1.879595 | 1.383422  | H | 1.023999  | 0.453600  | -2.299156 |
| H | 5.430228  | 0.985316  | -1.989392 | H | -0.483789 | 2.510212  | -2.338062 |
| H | 3.741755  | 2.884754  | 1.294363  | H | -0.318531 | 4.954005  | -2.640888 |
| H | 3.722177  | 3.779942  | -0.244519 | H | 1.707733  | 6.182232  | -1.853088 |
| H | 5.095321  | 2.716519  | 0.149502  | H | 3.573655  | 4.904777  | -0.803856 |
| H | 2.704628  | -2.247630 | 0.078039  | H | 3.416580  | 2.466379  | -0.528859 |
| H | 3.750257  | -2.087175 | -1.353147 | H | -4.496227 | -1.986076 | 2.540652  |
| H | 1.981419  | -2.182084 | -1.551277 | H | -2.918118 | 0.139457  | -1.640878 |
| H | 5.277335  | -1.232648 | 1.678092  | H | -3.429254 | -3.575519 | -3.777473 |
| C | 7.244483  | -0.008654 | -1.422256 | H | -3.978887 | -3.440369 | -2.087388 |
| H | 7.777390  | 0.339547  | -2.301689 | H | -2.630100 | -4.533319 | -2.497330 |
| O | 9.182638  | -1.238622 | -0.540494 | H | 0.086992  | -4.563512 | 0.612743  |
| C | 9.953016  | -0.839882 | -1.660433 | H | -0.204597 | -2.865357 | 1.060948  |
| H | 10.940901 | -1.284124 | -1.518748 | H | 0.944323  | -3.253707 | -0.239681 |
| H | 9.519354  | -1.209572 | -2.600232 | H | -2.585919 | -2.969479 | 1.299815  |
| H | 10.050881 | 0.253502  | -1.714624 | C | -4.291471 | 0.260148  | -0.002272 |
| K | 0.737993  | 1.157740  | 0.228298  | H | -4.788720 | 1.134515  | -0.410501 |
| O | 3.050331  | 0.199411  | 1.413237  | O | -5.816155 | 0.084277  | 1.910829  |
| H | 3.707119  | 0.465830  | 2.071333  | C | -6.583224 | 1.176744  | 1.424771  |

**P10**

SCF done: -1628.457708

|    |           |           |           |
|----|-----------|-----------|-----------|
| C  | 4.062377  | -0.686620 | 0.935714  |
| C  | 4.512772  | -1.774306 | 0.118447  |
| C  | 3.881447  | -1.972346 | -1.140203 |
| C  | 2.869057  | -1.144689 | -1.565099 |
| C  | 2.406798  | -0.047934 | -0.771074 |
| C  | 3.015193  | 0.147093  | 0.462937  |
| C  | 4.686596  | -0.476260 | 2.198542  |
| C  | 5.702889  | -1.301085 | 2.632334  |
| C  | 6.145549  | -2.378296 | 1.822014  |
| C  | 5.561802  | -2.607083 | 0.592980  |
| Ni | -0.368577 | 0.117313  | -0.437018 |
| C  | -1.894356 | 2.989110  | 0.941059  |
| C  | -1.423774 | 0.761314  | 2.803489  |
| C  | 0.725374  | 2.568104  | 2.122962  |
| P  | -0.669966 | 1.608995  | 1.303882  |
| O  | -0.372949 | -1.358513 | -1.641770 |
| C  | 1.296024  | 0.800478  | -1.298201 |
| C  | 1.433911  | 2.293485  | -1.370759 |
| C  | 0.401205  | 3.035953  | -1.984397 |
| C  | 0.493419  | 4.416112  | -2.156744 |
| C  | 1.630686  | 5.106446  | -1.718766 |
| C  | 2.672178  | 4.389148  | -1.126802 |
| C  | 2.577484  | 3.003269  | -0.957950 |

**PTS11**

SCF done: -1628.452182

|    |           |           |           |
|----|-----------|-----------|-----------|
| C  | 4.066285  | -0.867607 | 0.762954  |
| C  | 4.497981  | -1.859257 | -0.178042 |
| C  | 3.861085  | -1.893759 | -1.448855 |
| C  | 2.861296  | -1.004064 | -1.767859 |
| C  | 2.410374  | -0.003065 | -0.848418 |
| C  | 3.030334  | 0.030958  | 0.396361  |
| C  | 4.697770  | -0.819626 | 2.039213  |
| C  | 5.701448  | -1.706364 | 2.368121  |
| C  | 6.126019  | -2.687106 | 1.434723  |
| C  | 5.535074  | -2.758395 | 0.189822  |
| Ni | -0.399456 | 0.115474  | -0.471280 |
| C  | -2.110825 | 2.036261  | 1.942174  |
| C  | -0.123580 | 0.119630  | 2.938779  |
| C  | 0.669744  | 2.720293  | 1.911584  |
| P  | -0.455637 | 1.270734  | 1.485437  |
| O  | -0.412264 | -1.174505 | -1.954616 |
| C  | 1.298111  | 0.909698  | -1.253082 |
| C  | 1.493412  | 2.398007  | -1.200596 |
| C  | 0.437120  | 3.236093  | -1.619836 |

|                        |           |           |           |   |           |           |           |
|------------------------|-----------|-----------|-----------|---|-----------|-----------|-----------|
| C                      | 0.566936  | 4.623980  | -1.650543 | O | -0.754131 | -1.112749 | -1.536535 |
| C                      | 1.768979  | 5.228703  | -1.260603 | C | 1.277781  | 0.854688  | -1.150272 |
| C                      | 2.833756  | 4.417499  | -0.861971 | C | 1.769618  | 2.265676  | -1.269986 |
| C                      | 2.699710  | 3.025079  | -0.837007 | C | 0.899224  | 3.250275  | -1.791875 |
| C                      | -4.967181 | -0.380015 | 0.958943  | C | 1.296037  | 4.576445  | -1.957816 |
| C                      | -4.064823 | -1.260105 | 1.578765  | C | 2.592290  | 4.976165  | -1.606691 |
| C                      | -2.785120 | -1.424375 | 1.053749  | C | 3.477206  | 4.016810  | -1.107885 |
| C                      | -2.326466 | -0.741489 | -0.099722 | C | 3.075460  | 2.686502  | -0.947229 |
| C                      | -3.272172 | 0.129744  | -0.685433 | C | -5.151705 | -0.467892 | 0.657663  |
| B                      | -1.496790 | -2.024529 | -1.456947 | C | -4.191490 | -1.127343 | 1.437776  |
| O                      | -2.484575 | -2.174278 | -2.437701 | C | -2.836896 | -0.821270 | 1.288287  |
| C                      | -3.543325 | -3.098214 | -2.249795 | C | -2.370818 | 0.140205  | 0.366626  |
| O                      | -1.129088 | -3.158927 | -0.731791 | C | -3.364003 | 0.783255  | -0.391478 |
| C                      | 0.077592  | -3.216049 | 0.003600  | B | -1.294114 | -2.394138 | -1.334427 |
| H                      | 4.179375  | -2.638021 | -2.176406 | O | -2.239717 | -2.780614 | -2.236734 |
| H                      | 2.392540  | -1.055982 | -2.746718 | C | -2.873736 | -4.057208 | -2.143146 |
| H                      | 2.722650  | 0.766799  | 1.133869  | O | -0.873192 | -3.220767 | -0.350959 |
| H                      | 4.377148  | -0.065202 | 2.755416  | C | 0.151324  | -2.909810 | 0.596008  |
| H                      | 6.173706  | -1.655143 | 3.346119  | H | 3.667896  | -3.018787 | -2.207975 |
| H                      | 6.918620  | -3.380390 | 1.704258  | H | 2.090954  | -1.205423 | -2.716571 |
| H                      | 5.857900  | -3.507738 | -0.530214 | H | 2.693066  | 0.470848  | 1.193745  |
| H                      | -2.038765 | 2.491724  | 2.935851  | H | 4.266600  | -0.599604 | 2.769185  |
| H                      | -2.891740 | 1.275608  | 1.940496  | H | 5.853733  | -2.418210 | 3.296756  |
| H                      | -2.363307 | 2.808161  | 1.209969  | H | 6.348676  | -4.187981 | 1.607940  |
| H                      | 0.868825  | -0.325997 | 2.828840  | H | 5.246795  | -4.130107 | -0.609217 |
| H                      | -0.871154 | -0.675767 | 2.950809  | H | -1.594567 | 4.121590  | 2.068410  |
| H                      | -0.171485 | 0.678124  | 3.879833  | H | -2.620292 | 3.067414  | 1.047319  |
| H                      | 0.452309  | 3.034083  | 2.938457  | H | -1.298439 | 4.014911  | 0.311706  |
| H                      | 0.483419  | 3.550683  | 1.227882  | H | -0.279691 | 0.570001  | 3.465535  |
| H                      | 1.720830  | 2.442267  | 1.833796  | H | -1.969709 | 0.984695  | 3.098161  |
| H                      | 1.015080  | 0.672397  | -2.285231 | H | -0.905449 | 2.184341  | 3.894119  |
| H                      | -0.503497 | 2.779933  | -1.924862 | H | 0.896109  | 3.639060  | 2.776904  |
| H                      | -0.269539 | 5.236199  | -1.980783 | H | 1.532646  | 3.514198  | 1.111471  |
| H                      | 1.874539  | 6.310383  | -1.280164 | H | 1.902754  | 2.248659  | 2.300776  |
| H                      | 3.782206  | 4.867029  | -0.575795 | H | 0.835749  | 0.603650  | -2.125445 |
| H                      | 3.551402  | 2.418412  | -0.544971 | H | -0.111085 | 2.956550  | -2.074651 |
| H                      | -4.396284 | -1.815058 | 2.452797  | H | 0.594365  | 5.301037  | -2.366320 |
| H                      | -3.011159 | 0.665962  | -1.598154 | H | 2.906532  | 6.009011  | -1.732938 |
| H                      | -4.113656 | -3.141702 | -3.183135 | H | 4.495199  | 4.300023  | -0.848013 |
| H                      | -4.209109 | -2.769338 | -1.440136 | H | 3.792328  | 1.962357  | -0.572446 |
| H                      | -3.160558 | -4.097376 | -2.010071 | H | -4.525032 | -1.876652 | 2.151799  |
| H                      | 0.114652  | -4.187743 | 0.506559  | H | -3.085084 | 1.545914  | -1.121338 |
| H                      | 0.125372  | -2.422532 | 0.765670  | H | -3.545249 | -4.144959 | -3.000478 |
| H                      | 0.953149  | -3.113534 | -0.647845 | H | -3.451081 | -4.131916 | -1.215804 |
| H                      | -2.134054 | -2.151507 | 1.534845  | H | -2.133353 | -4.863826 | -2.170859 |
| C                      | -4.566704 | 0.320424  | -0.188392 | H | 0.007226  | -3.572276 | 1.453075  |
| H                      | -5.245372 | 0.995759  | -0.699391 | H | 0.087718  | -1.866512 | 0.921660  |
| O                      | -6.202518 | -0.286120 | 1.535075  | H | 1.135884  | -3.085969 | 0.155507  |
| C                      | -7.177244 | 0.552515  | 0.928174  | H | -2.130723 | -1.363019 | 1.916841  |
| H                      | -8.074962 | 0.454527  | 1.541234  | C | -4.735125 | 0.497742  | -0.264757 |
| H                      | -6.854070 | 1.601902  | 0.920112  | H | -5.450844 | 1.028458  | -0.885053 |
| H                      | -7.397924 | 0.229705  | -0.097563 | O | -6.458382 | -0.835329 | 0.871389  |
| H                      | -0.673931 | -0.804644 | -2.813750 | C | -7.467842 | -0.207488 | 0.097808  |
|                        |           |           |           | H | -8.411990 | -0.649486 | 0.422692  |
|                        |           |           |           | H | -7.494412 | 0.876791  | 0.274156  |
|                        |           |           |           | H | -7.327224 | -0.396409 | -0.975422 |
|                        |           |           |           | H | -1.214944 | -0.704913 | -2.288997 |
| <b>P12</b>             |           |           |           |   |           |           |           |
| SCF done: -1628.469156 |           |           |           |   |           |           |           |
| C                      | 3.826077  | -1.310198 | 0.766776  |   |           |           |           |
| C                      | 4.112639  | -2.330158 | -0.200377 |   |           |           |           |
| C                      | 3.455142  | -2.257639 | -1.459210 |   |           |           |           |
| C                      | 2.570507  | -1.240640 | -1.741250 |   |           |           |           |
| C                      | 2.263169  | -0.210762 | -0.794977 |   |           |           |           |
| C                      | 2.903825  | -0.282106 | 0.438087  |   |           |           |           |
| C                      | 4.478086  | -1.372439 | 2.032583  |   |           |           |           |
| C                      | 5.364457  | -2.387387 | 2.326213  |   |           |           |           |
| C                      | 5.646559  | -3.394032 | 1.366544  |   |           |           |           |
| C                      | 5.032168  | -3.362033 | 0.131457  |   |           |           |           |
| Ni                     | -0.499986 | 0.480534  | -0.166354 |   |           |           |           |
| C                      | -1.611570 | 3.456593  | 1.198122  |   |           |           |           |
| C                      | -0.952964 | 1.375414  | 3.157041  |   |           |           |           |
| C                      | 1.139310  | 2.952082  | 1.958661  |   |           |           |           |
| P                      | -0.425291 | 2.024485  | 1.471354  |   |           |           |           |
| <b>P13</b>             |           |           |           |   |           |           |           |
| SCF done: -1297.386291 |           |           |           |   |           |           |           |
| C                      | -3.671569 | 0.097553  | 0.543907  |   |           |           |           |
| C                      | -4.430116 | 0.826321  | -0.428850 |   |           |           |           |
| C                      | -3.841319 | 1.050585  | -1.703425 |   |           |           |           |
| C                      | -2.587375 | 0.569092  | -1.999305 |   |           |           |           |
| C                      | -1.816140 | -0.176691 | -1.052013 |   |           |           |           |
| C                      | -2.375955 | -0.376991 | 0.203622  |   |           |           |           |
| C                      | -4.241902 | -0.117246 | 1.830782  |   |           |           |           |
| C                      | -5.499951 | 0.357285  | 2.137961  |   |           |           |           |
| C                      | -6.251097 | 1.073373  | 1.170805  |   |           |           |           |
| C                      | -5.724078 | 1.301912  | -0.083624 |   |           |           |           |
| Ni                     | 0.888704  | -0.809475 | -0.061956 |   |           |           |           |

|   |           |           |           |                        |           |           |           |
|---|-----------|-----------|-----------|------------------------|-----------|-----------|-----------|
| C | 4.174067  | -0.932737 | 1.182498  | C                      | -0.310330 | -3.987671 | -0.887666 |
| C | 2.170849  | -0.138600 | 3.160098  | C                      | -0.611667 | -2.619312 | -0.709106 |
| C | 2.474797  | -2.950998 | 2.435771  | C                      | 2.629714  | 3.168584  | -0.354347 |
| P | 2.375929  | -1.239909 | 1.648134  | C                      | 1.410129  | 3.078992  | 0.333796  |
| C | -0.472649 | -0.655619 | -1.485295 | C                      | 0.622308  | 1.935002  | 0.233784  |
| C | -0.058606 | -2.062354 | -1.509794 | C                      | 1.022532  | 0.822854  | -0.542465 |
| C | 0.794288  | -2.547513 | -2.549521 | C                      | 2.231058  | 0.956911  | -1.258896 |
| C | 1.332379  | -3.820639 | -2.508986 | H                      | -4.403188 | 1.825713  | -2.529276 |
| C | 1.072948  | -4.678162 | -1.416890 | H                      | -2.119413 | 1.073417  | -3.045484 |
| C | 0.273479  | -4.227838 | -0.378648 | H                      | -1.614877 | -0.316196 | 0.990313  |
| C | -0.277831 | -2.927327 | -0.402195 | H                      | -3.474247 | -0.092026 | -2.613364 |
| C | 1.986710  | 3.814539  | -0.240572 | H                      | -5.770819 | 0.656279  | 3.144260  |
| C | 0.907209  | 3.378014  | 0.540365  | H                      | -7.179440 | 1.732590  | 1.389008  |
| C | 0.565812  | 2.024650  | 0.572883  | H                      | -6.283885 | 2.061281  | -0.894995 |
| C | 1.286002  | 1.054467  | -0.153062 | H                      | 4.312102  | -1.241463 | 2.820016  |
| C | 2.351140  | 1.521551  | -0.937010 | H                      | 4.044081  | -0.162631 | 1.417465  |
| H | -4.399490 | 1.612597  | -2.449700 | H                      | 4.191192  | -1.914517 | 1.168783  |
| H | -2.161019 | 0.754581  | -2.982425 | H                      | 0.567371  | -0.195359 | 3.751950  |
| H | -1.809754 | -0.878954 | 0.983471  | H                      | 1.747257  | 0.926430  | 3.043528  |
| H | -3.666967 | -0.667093 | 2.573646  | H                      | 2.275222  | -0.267197 | 4.267581  |
| H | -5.921353 | 0.183065  | 3.124968  | H                      | 2.464820  | -2.957965 | 3.839937  |
| H | -7.242034 | 1.442325  | 1.422869  | H                      | 2.119996  | -3.770892 | 2.285102  |
| H | -6.294997 | 1.853455  | -0.827948 | H                      | 0.784244  | -3.124437 | 3.256835  |
| H | 4.826532  | -1.066117 | 2.052428  | H                      | -0.066089 | 0.310402  | -2.410353 |
| H | 4.270495  | 0.087118  | 0.801832  | H                      | 1.168461  | -1.392058 | -3.365364 |
| H | 4.470699  | -1.632320 | 0.395471  | H                      | 1.690558  | -3.780792 | -3.626904 |
| H | 1.204655  | -0.343307 | 3.631042  | H                      | 0.738614  | -5.468756 | -2.048383 |
| H | 2.187765  | 0.906850  | 2.842390  | H                      | -0.752142 | -4.713309 | -0.208008 |
| H | 2.972553  | -0.322545 | 3.883632  | H                      | -1.393066 | -2.350996 | -0.004757 |
| H | 3.261923  | -2.984041 | 3.197365  | H                      | 1.093073  | 3.921871  | 0.942774  |
| H | 2.682285  | -3.695906 | 1.662688  | H                      | 2.563364  | 0.151128  | -1.910850 |
| H | 1.514420  | -3.192671 | 2.900577  | H                      | -0.320358 | 1.908838  | 0.772208  |
| H | -0.134586 | -0.120897 | -2.373075 | C                      | 3.038792  | 2.097006  | -1.158752 |
| H | 0.996556  | -1.897007 | -3.397179 | H                      | 3.967697  | 2.137396  | -1.718794 |
| H | 1.953710  | -4.167691 | -3.331431 | O                      | 3.332450  | 4.336385  | -0.186424 |
| H | 1.489226  | -5.681982 | -1.399520 | C                      | 4.556334  | 4.492745  | -0.885628 |
| H | 0.047827  | -4.881651 | 0.460786  | H                      | 4.931867  | 5.481282  | -0.613615 |
| H | -0.998274 | -2.656319 | 0.362278  | H                      | 5.290354  | 3.730792  | -0.588321 |
| H | 0.340675  | 4.114150  | 1.105467  | H                      | 4.406324  | 4.446844  | -1.973120 |
| H | 2.932709  | 0.826209  | -1.541962 |                        |           |           |           |
| H | -0.294031 | 1.730037  | 1.171965  | <b>P15</b>             |           |           |           |
| C | 2.711271  | 2.880740  | -0.988074 | SCF done: -1297.391515 |           |           |           |
| H | 3.543925  | 3.185853  | -1.614393 | C                      | 4.039338  | 0.065276  | -0.778046 |
| O | 2.246980  | 5.165773  | -0.208812 | C                      | 4.805624  | -1.060671 | -0.336062 |
| C | 3.310577  | 5.662075  | -1.002384 | C                      | 4.298424  | -1.838361 | 0.743194  |
| H | 3.332200  | 6.741006  | -0.834255 | C                      | 3.102775  | -1.519857 | 1.343599  |
| H | 4.274975  | 5.228513  | -0.701645 | C                      | 2.328607  | -0.401367 | 0.912013  |
| H | 3.143251  | 5.463859  | -2.070367 | C                      | 2.806881  | 0.366711  | -0.129573 |
|   |           |           |           | C                      | 4.537911  | 0.853784  | -1.851383 |
|   |           |           |           | C                      | 5.736249  | 0.543368  | -2.461290 |
|   |           |           |           | C                      | 6.493049  | -0.572789 | -2.023604 |
|   |           |           |           | C                      | 6.036064  | -1.355904 | -0.983203 |
|   |           |           |           | Ni                     | -1.969624 | -1.318196 | -0.418994 |
|   |           |           |           | C                      | -5.301004 | -0.225882 | -0.012145 |
|   |           |           |           | C                      | -4.034283 | 0.774331  | -2.429158 |
|   |           |           |           | C                      | -4.837638 | -2.011875 | -2.264275 |
|   |           |           |           | P                      | -3.943241 | -0.697232 | -1.241010 |
|   |           |           |           | C                      | 1.009982  | -0.116125 | 1.646366  |
|   |           |           |           | C                      | 0.014891  | -1.272668 | 1.494702  |
|   |           |           |           | C                      | -0.680860 | -1.727692 | 2.612429  |
|   |           |           |           | C                      | -1.564049 | -2.827840 | 2.528516  |
|   |           |           |           | C                      | -1.764440 | -3.475720 | 1.318689  |
|   |           |           |           | C                      | -1.077080 | -3.042713 | 0.150205  |
|   |           |           |           | C                      | -0.169921 | -1.938038 | 0.242306  |
|   |           |           |           | C                      | -0.527093 | 3.878352  | 0.805188  |
|   |           |           |           | C                      | 0.304288  | 3.638708  | 1.909048  |
|   |           |           |           | C                      | 0.770088  | 2.352081  | 2.160874  |
|   |           |           |           | C                      | 0.425980  | 1.265248  | 1.337987  |
|   |           |           |           | C                      | -0.411648 | 1.522627  | 0.250784  |
|   |           |           |           | H                      | 4.873203  | -2.694655 | 1.090451  |
|   |           |           |           | H                      | 2.729589  | -2.132323 | 2.161567  |

  

|                         |           |           |           |  |  |  |  |
|-------------------------|-----------|-----------|-----------|--|--|--|--|
| <b>PTS<sub>14</sub></b> |           |           |           |  |  |  |  |
| SCF done: -1297.355143  |           |           |           |  |  |  |  |
| C                       | -3.546503 | 0.549163  | 0.543301  |  |  |  |  |
| C                       | -4.356579 | 1.170493  | -0.462609 |  |  |  |  |
| C                       | -3.800791 | 1.347885  | -1.759371 |  |  |  |  |
| C                       | -2.522246 | 0.926292  | -2.045826 |  |  |  |  |
| C                       | -1.706510 | 0.293003  | -1.061413 |  |  |  |  |
| C                       | -2.230218 | 0.128388  | 0.209955  |  |  |  |  |
| C                       | -4.088920 | 0.377936  | 1.848211  |  |  |  |  |
| C                       | -5.369772 | 0.795527  | 2.143435  |  |  |  |  |
| C                       | -6.171110 | 1.407618  | 1.145617  |  |  |  |  |
| C                       | -5.672788 | 1.590603  | -0.127532 |  |  |  |  |
| Ni                      | 0.840502  | -1.031758 | 0.093248  |  |  |  |  |
| C                       | 3.817194  | -1.142169 | 1.847225  |  |  |  |  |
| C                       | 1.604452  | -0.090527 | 3.418952  |  |  |  |  |
| C                       | 1.821734  | -2.956965 | 2.952250  |  |  |  |  |
| P                       | 1.945731  | -1.316097 | 2.023437  |  |  |  |  |
| C                       | -0.334883 | -0.164315 | -1.468542 |  |  |  |  |
| C                       | -0.093713 | -1.641514 | -1.614718 |  |  |  |  |
| C                       | 0.764521  | -2.111290 | -2.655697 |  |  |  |  |
| C                       | 1.054308  | -3.458301 | -2.805680 |  |  |  |  |
| C                       | 0.516503  | -4.412950 | -1.917615 |  |  |  |  |

|                        |           |           |           |                        |           |           |           |
|------------------------|-----------|-----------|-----------|------------------------|-----------|-----------|-----------|
| H                      | 2.245474  | 1.231364  | -0.472136 | H                      | -6.999305 | 0.988400  | -0.962238 |
| H                      | 3.957126  | 1.711151  | -2.185091 | C                      | -2.393759 | -2.534679 | 0.378048  |
| H                      | 6.105069  | 1.155335  | -3.280661 | H                      | -1.541202 | -2.596808 | -0.309164 |
| H                      | 7.435883  | -0.808754 | -2.510612 | H                      | -1.997207 | -2.655516 | 1.394145  |
| H                      | 6.614967  | -2.212539 | -0.643937 | H                      | -3.060346 | -3.380236 | 0.179166  |
| H                      | -6.233821 | 0.020245  | -0.532848 | C                      | 0.771217  | 0.020027  | 2.267973  |
| H                      | -4.972872 | 0.635960  | 0.576167  | H                      | 1.193029  | 0.907200  | 2.756252  |
| H                      | -5.474633 | -1.062268 | 0.670928  | H                      | 1.189047  | -0.864588 | 2.764425  |
| H                      | -3.378608 | 0.591905  | -3.285611 | C                      | -0.771238 | 0.023383  | 2.267938  |
| H                      | -3.691928 | 1.677238  | -1.915098 | H                      | -1.193094 | -0.857067 | 2.768226  |
| H                      | -5.060360 | 0.928590  | -2.783269 | H                      | -1.189045 | 0.914660  | 2.752322  |
| H                      | -5.806372 | -1.640650 | -2.618923 | Ni                     | 0.000013  | -0.004860 | -1.750745 |
| H                      | -4.992529 | -2.903558 | -1.650202 |                        |           |           |           |
| H                      | -4.216206 | -2.286539 | -3.121390 |                        |           |           |           |
| H                      | 1.268317  | -0.092446 | 2.714000  | <b>#2b</b>             |           |           |           |
| H                      | -0.530094 | -1.236533 | 3.571936  | SCF done: -2150.978762 |           |           |           |
| H                      | -2.079819 | -3.169168 | 3.422987  | C                      | 0.653338  | -0.179043 | 3.018665  |
| H                      | -2.422848 | -4.339786 | 1.262472  | C                      | 0.201846  | 1.052763  | 3.591895  |
| H                      | -1.063550 | -3.687715 | -0.726737 | C                      | -0.938754 | 1.704860  | 3.011630  |
| H                      | 0.538324  | -1.752262 | -0.563305 | C                      | -1.602685 | 1.160756  | 1.944864  |
| H                      | 0.572339  | 4.470607  | 2.553911  | C                      | -1.205390 | -0.099092 | 1.359527  |
| H                      | -0.720406 | 0.703330  | -0.401583 | C                      | -0.048931 | -0.741157 | 1.883431  |
| H                      | 1.422442  | 2.187760  | 3.016611  | C                      | 1.763835  | -0.832682 | 3.605519  |
| C                      | -0.886762 | 2.811132  | -0.026482 | C                      | 2.418273  | -0.290616 | 4.701401  |
| H                      | -1.530052 | 2.962366  | -0.886847 | C                      | 1.980573  | 0.930056  | 5.256867  |
| O                      | -0.934268 | 5.174300  | 0.631551  | C                      | 0.888682  | 1.585170  | 4.708059  |
| C                      | -1.766948 | 5.479254  | -0.476923 | C                      | -2.243702 | -0.806154 | 0.502209  |
| H                      | -1.953198 | 6.553523  | -0.423028 | Ni                     | 0.423618  | 0.421329  | 0.307893  |
| H                      | -1.270919 | 5.242261  | -1.427824 | O                      | -2.656687 | -1.507619 | -2.115425 |
| H                      | -2.722816 | 4.940913  | -0.419871 | C                      | -1.949461 | -2.227196 | -1.414182 |
|                        |           |           |           | O                      | -1.623714 | -1.967447 | -0.118566 |
| <b>#1</b>              |           |           |           | N                      | -1.384538 | -3.385980 | -1.836086 |
| SCF done: -1094.690893 |           |           |           | C                      | -0.567824 | -4.289385 | -1.010447 |
| N                      | 1.096845  | 0.012524  | 0.829251  | C                      | -0.089134 | -5.344657 | -2.022380 |
| N                      | -1.096843 | 0.011261  | 0.829245  | C                      | -1.220353 | -5.384312 | -3.066411 |
| C                      | 0.000005  | 0.006119  | 0.017098  | C                      | -1.651170 | -3.913772 | -3.180129 |
| C                      | -2.459125 | 0.005504  | 0.384312  | C                      | -3.475528 | -1.274130 | 1.270517  |
| C                      | -3.130185 | 1.226461  | 0.191492  | C                      | -3.368129 | -1.881532 | 2.530201  |
| C                      | -3.124509 | -1.224276 | 0.206191  | C                      | -4.507513 | -2.331916 | 3.200103  |
| C                      | -4.481187 | 1.195341  | -0.179285 | C                      | -5.772025 | -2.176997 | 2.620865  |
| C                      | -4.472725 | -1.206237 | -0.164535 | C                      | -5.888488 | -1.569323 | 1.367869  |
| C                      | -5.171503 | -0.007369 | -0.359779 | C                      | -4.745715 | -1.121794 | 0.697353  |
| H                      | -5.003281 | 2.137655  | -0.335810 | H                      | -1.266868 | 2.653333  | 3.431995  |
| H                      | -4.989387 | -2.153794 | -0.310214 | H                      | -2.471758 | 1.670177  | 1.533649  |
| C                      | 2.459127  | 0.005767  | 0.384329  | H                      | 0.167904  | -1.772514 | 1.614441  |
| C                      | 3.131631  | 1.226389  | 0.194491  | H                      | 2.103440  | -1.773387 | 3.176638  |
| C                      | 3.123058  | -1.224368 | 0.203200  | H                      | 3.270716  | -0.808285 | 5.135138  |
| C                      | 4.482592  | 1.194630  | -0.176369 | H                      | 2.495129  | 1.352008  | 6.116692  |
| C                      | 4.471295  | -1.206964 | -0.167493 | H                      | 0.540942  | 2.522840  | 5.138054  |
| C                      | 5.171489  | -0.008447 | -0.359805 | H                      | -2.568485 | -0.138484 | -0.299422 |
| H                      | 5.005782  | 2.136715  | -0.330596 | H                      | -1.177942 | -4.736936 | -0.214048 |
| H                      | 4.986849  | -2.154763 | -0.315507 | H                      | 0.254793  | -3.746069 | -0.536629 |
| C                      | 2.412183  | 2.544863  | 0.351464  | H                      | 0.098502  | -6.314777 | -1.551112 |
| H                      | 3.085905  | 3.382266  | 0.142352  | H                      | 0.845645  | -5.014602 | -2.493226 |
| H                      | 1.559903  | 2.606438  | -0.336182 | H                      | -2.055543 | -5.990644 | -2.693448 |
| H                      | 2.017233  | 2.681319  | 1.366199  | H                      | -0.905219 | -5.802534 | -4.027757 |
| C                      | 6.632759  | -0.023387 | -0.749727 | H                      | -1.056590 | -3.373157 | -3.930466 |
| H                      | 7.255299  | -0.443481 | 0.051369  | H                      | -2.706065 | -3.782269 | -3.436826 |
| H                      | 6.801931  | -0.635804 | -1.644233 | H                      | -2.390237 | -1.991541 | 2.990887  |
| H                      | 7.000229  | 0.986507  | -0.960778 | H                      | -4.409508 | -2.797623 | 4.177853  |
| C                      | 2.390818  | -2.534362 | 0.371735  | H                      | -6.659222 | -2.523693 | 3.145282  |
| H                      | 1.993856  | -2.657190 | 1.387427  | H                      | -6.867160 | -1.443535 | 0.910796  |
| H                      | 1.538391  | -2.593864 | -0.315893 | H                      | -4.834773 | -0.662319 | -0.284030 |
| H                      | 3.056527  | -3.380179 | 0.171023  | N                      | 0.893446  | 2.379992  | -1.818386 |
| C                      | -2.409227 | 2.544497  | 0.345124  | N                      | 2.642315  | 1.133341  | -1.439197 |
| H                      | -1.557101 | 2.603437  | -0.342964 | C                      | 1.356020  | 1.353814  | -1.059845 |
| H                      | -3.082082 | 3.382150  | 0.134229  | C                      | 3.499888  | 0.117438  | -0.902098 |
| H                      | -2.013814 | 2.682935  | 1.359404  | C                      | 4.313585  | 0.415315  | 0.208655  |
| C                      | -6.632770 | -0.021531 | -0.749744 | C                      | 3.551478  | -1.143323 | -1.524138 |
| H                      | -6.802454 | -0.635039 | -1.643410 | C                      | 5.185169  | -0.572839 | 0.679182  |
| H                      | -7.255731 | -0.439947 | 0.051898  | C                      | 4.439365  | -2.101370 | -1.017396 |
|                        |           |           |           | C                      | 5.265324  | -1.836495 | 0.080247  |



|   |           |           |           |    |           |           |           |
|---|-----------|-----------|-----------|----|-----------|-----------|-----------|
| H | 5.814261  | -0.350065 | 1.539462  | C  | 3.494027  | -2.570387 | 2.754576  |
| H | 4.485557  | -3.078850 | -1.494716 | H  | 4.310469  | -2.141778 | 3.333729  |
| C | -0.402419 | 2.987132  | -1.707481 | C  | 2.490984  | -4.445121 | 1.608484  |
| C | -0.596045 | 4.022090  | -0.767124 | H  | 2.526727  | -5.483348 | 1.286130  |
| C | -1.436605 | 2.586095  | -2.570438 | C  | 3.564262  | -3.893016 | 2.326230  |
| C | -1.847026 | 4.641088  | -0.705345 | H  | 4.437044  | -4.498231 | 2.559708  |
| C | -2.674165 | 3.241818  | -2.473053 | C  | -2.632445 | -0.529080 | 2.515899  |
| C | -2.900964 | 4.266301  | -1.551542 | C  | -3.157295 | -1.061158 | 1.327479  |
| H | -2.004224 | 5.436863  | 0.021341  | C  | -3.314507 | -0.767088 | 3.720400  |
| H | -3.479967 | 2.934051  | -3.137170 | C  | -4.320982 | -1.830730 | 1.352037  |
| C | 0.509468  | 4.435168  | 0.175487  | H  | -2.666696 | -0.850415 | 0.382424  |
| H | 0.192619  | 5.277731  | 0.798886  | C  | -4.472998 | -1.547042 | 3.747008  |
| H | 0.787878  | 3.605562  | 0.835726  | H  | -2.928952 | -0.344268 | 4.645613  |
| H | 1.416653  | 4.740386  | -0.360844 | C  | -4.980072 | -2.082851 | 2.560356  |
| C | -4.240443 | 4.963790  | -1.467351 | H  | -4.713335 | -2.231651 | 0.421465  |
| H | -4.147768 | 6.034705  | -1.690485 | H  | -4.981369 | -1.726943 | 4.691015  |
| H | -4.958533 | 4.536334  | -2.175042 | H  | -5.885407 | -2.684825 | 2.574672  |
| H | -4.671925 | 4.880682  | -0.461625 | H  | -1.330841 | 0.877184  | 3.469932  |
| C | -1.271494 | 1.454899  | -3.558771 | Ni | 0.187057  | 0.065841  | 0.216879  |
| H | -0.238629 | 1.350486  | -3.903540 | C  | 0.758547  | -0.307009 | -1.574246 |
| H | -1.566606 | 0.498994  | -3.107318 | N  | 1.992669  | -0.060942 | -2.079798 |
| H | -1.911440 | 1.612272  | -4.434309 | N  | 0.004242  | -0.789803 | -2.596292 |
| C | 4.228919  | 1.755985  | 0.898560  | C  | 3.124054  | 0.456270  | -1.361704 |
| H | 3.229326  | 1.913586  | 1.319942  | C  | 2.134058  | -0.394365 | -3.513829 |
| H | 4.955514  | 1.819578  | 1.714659  | C  | -1.390721 | -1.118489 | -2.548288 |
| H | 4.423559  | 2.587184  | 0.209386  | C  | 0.717449  | -0.856966 | -3.891056 |
| C | 6.207078  | -2.888965 | 0.621648  | C  | 4.081844  | -0.436614 | -0.846722 |
| H | 5.830712  | -3.313447 | 1.562224  | C  | 3.300819  | 1.850310  | -1.267862 |
| H | 6.333082  | -3.715738 | -0.085786 | H  | 2.885497  | -1.180163 | -3.651673 |
| H | 7.198627  | -2.470078 | 0.831214  | H  | 2.459902  | 0.486308  | -4.079303 |
| C | 2.654844  | -1.472829 | -2.694636 | C  | -1.776187 | -2.461058 | -2.386228 |
| H | 1.598740  | -1.349509 | -2.427376 | C  | -2.349971 | -0.105633 | -2.756490 |
| H | 2.845788  | -0.822105 | -3.557421 | H  | 0.237502  | -0.196987 | -4.624208 |
| H | 2.810282  | -2.506311 | -3.021683 | H  | 0.695268  | -1.876545 | -4.291791 |
| C | 1.895850  | 2.937759  | -2.752049 | C  | 5.204545  | 0.094069  | -0.198945 |
| H | 2.091788  | 3.991417  | -2.518236 | C  | 3.926849  | -1.931080 | -0.995226 |
| H | 1.530027  | 2.887283  | -3.784350 | C  | 4.439784  | 2.332334  | -0.612933 |
| C | 3.120591  | 2.037422  | -2.506993 | C  | 2.293236  | 2.809612  | -1.855154 |
| H | 3.408690  | 1.465037  | -3.397017 | C  | -3.142297 | -2.773878 | -2.428699 |
| H | 4.000638  | 2.598952  | -2.171452 | C  | -0.751002 | -3.550233 | -2.175071 |

**TS<sub>3b</sub>**

SCF done: -2150.967091

|   |           |           |           |
|---|-----------|-----------|-----------|
| C | -1.377367 | 0.263853  | 2.573606  |
| O | -0.293953 | 2.022152  | 0.131070  |
| C | -1.250071 | 2.464758  | 0.839292  |
| O | -1.973688 | 1.780956  | 1.667097  |
| N | -1.588076 | 3.783264  | 0.726188  |
| C | -2.693868 | 4.406785  | 1.464360  |
| C | -2.850824 | 5.770521  | 0.772085  |
| C | -1.425618 | 6.089699  | 0.284140  |
| C | -0.883091 | 4.719674  | -0.155778 |
| C | -0.092189 | -0.266545 | 2.185827  |
| C | 1.079586  | 0.271747  | 2.873799  |
| C | 2.243094  | -0.420881 | 2.987056  |
| C | 2.368726  | -1.769835 | 2.474339  |
| C | 1.291101  | -2.316889 | 1.719585  |
| C | 0.119619  | -1.495521 | 1.402658  |
| H | -2.434011 | 4.519584  | 2.526923  |
| H | -3.593140 | 3.786671  | 1.409996  |
| H | -3.259384 | 6.534343  | 1.441729  |
| H | -3.529786 | 5.679124  | -0.085582 |
| H | -0.823074 | 6.481247  | 1.113844  |
| H | -1.400552 | 6.827732  | -0.524337 |
| H | -1.116062 | 4.512793  | -1.210852 |
| H | 0.199611  | 4.624934  | -0.032410 |
| H | 0.992144  | 1.255871  | 3.332788  |
| H | 3.087282  | 0.011685  | 3.520090  |
| H | -0.764011 | -2.076239 | 1.139107  |
| C | 1.373886  | -3.665477 | 1.317663  |
| H | 0.537962  | -4.103497 | 0.775586  |

**4b**

SCF done: -2151.003332

|    |           |           |           |
|----|-----------|-----------|-----------|
| C  | 3.494027  | -2.570387 | 2.754576  |
| H  | 4.310469  | -2.141778 | 3.333729  |
| C  | 2.490984  | -4.445121 | 1.608484  |
| H  | 2.526727  | -5.483348 | 1.286130  |
| C  | 3.564262  | -3.893016 | 2.326230  |
| H  | 4.437044  | -4.498231 | 2.559708  |
| C  | -2.632445 | -0.529080 | 2.515899  |
| C  | -3.157295 | -1.061158 | 1.327479  |
| C  | -3.314507 | -0.767088 | 3.720400  |
| C  | -4.320982 | -1.830730 | 1.352037  |
| H  | -2.666696 | -0.850415 | 0.382424  |
| C  | -4.472998 | -1.547042 | 3.747008  |
| H  | -2.928952 | -0.344268 | 4.645613  |
| C  | -4.980072 | -2.082851 | 2.560356  |
| H  | -4.713335 | -2.231651 | 0.421465  |
| H  | -4.981369 | -1.726943 | 4.691015  |
| H  | -5.885407 | -2.684825 | 2.574672  |
| H  | -1.330841 | 0.877184  | 3.469932  |
| Ni | 0.187057  | 0.065841  | 0.216879  |
| C  | 0.758547  | -0.307009 | -1.574246 |
| N  | 1.992669  | -0.060942 | -2.079798 |
| N  | 0.004242  | -0.789803 | -2.596292 |
| C  | 3.124054  | 0.456270  | -1.361704 |
| C  | 2.134058  | -0.394365 | -3.513829 |
| C  | -1.390721 | -1.118489 | -2.548288 |
| C  | 0.717449  | -0.856966 | -3.891056 |
| C  | 4.081844  | -0.436614 | -0.846722 |
| C  | 3.300819  | 1.850310  | -1.267862 |
| H  | 2.885497  | -1.180163 | -3.651673 |
| H  | 2.459902  | 0.486308  | -4.079303 |
| C  | -1.776187 | -2.461058 | -2.386228 |
| C  | -2.349971 | -0.105633 | -2.756490 |
| H  | 0.237502  | -0.196987 | -4.624208 |
| H  | 0.695268  | -1.876545 | -4.291791 |
| C  | 5.204545  | 0.094069  | -0.198945 |
| C  | 3.926849  | -1.931080 | -0.995226 |
| C  | 4.439784  | 2.332334  | -0.612933 |
| C  | 2.293236  | 2.809612  | -1.855154 |
| C  | -3.142297 | -2.773878 | -2.428699 |
| C  | -0.751002 | -3.550233 | -2.175071 |
| C  | -3.701038 | -0.466336 | -2.790335 |
| C  | -1.937554 | 1.336293  | -2.936943 |
| C  | 5.399132  | 1.472547  | -0.064533 |
| H  | 5.943211  | -0.592120 | 0.211540  |
| H  | 4.609825  | -2.460509 | -0.325505 |
| H  | 2.910922  | -2.256529 | -0.757106 |
| H  | 4.150866  | -2.258964 | -2.020376 |
| H  | 4.581494  | 3.409035  | -0.533749 |
| H  | 2.117174  | 2.612402  | -2.920593 |
| H  | 1.329891  | 2.727856  | -1.341389 |
| H  | 2.649517  | 3.841624  | -1.764723 |
| C  | -4.118925 | -1.794883 | -2.635231 |
| H  | -3.446244 | -3.810830 | -2.296732 |
| H  | -0.007232 | -3.259593 | -1.427763 |
| H  | -1.232114 | -4.476039 | -1.843032 |
| H  | -0.207322 | -3.780471 | -3.101690 |
| H  | -4.446915 | 0.311907  | -2.943873 |
| H  | -1.377836 | 1.700943  | -2.069339 |
| H  | -1.293828 | 1.466367  | -3.816796 |
| H  | -2.817483 | 1.973285  | -3.075241 |
| C  | 6.602079  | 2.020802  | 0.669790  |
| C  | -5.586786 | -2.153087 | -2.703914 |
| H  | 6.925478  | 2.980492  | 0.250475  |
| H  | 6.373390  | 2.189779  | 1.731105  |
| H  | 7.449837  | 1.327953  | 0.625317  |
| H  | -5.981012 | -2.016816 | -3.719696 |
| H  | -5.758169 | -3.197114 | -2.420629 |
| H  | -6.185773 | -1.519402 | -2.038322 |

|    |           |           |           |            |              |           |           |
|----|-----------|-----------|-----------|------------|--------------|-----------|-----------|
| C  | 0.891540  | 1.060422  | -1.941970 | H          | -5.279461    | -2.115694 | -0.055007 |
| O  | -0.213643 | 1.855421  | 0.638636  | H          | -3.487357    | -3.617055 | 0.144615  |
| C  | 0.305937  | 3.066183  | 0.393344  | H          | -1.883876    | -2.878292 | 0.133056  |
| O  | 1.443069  | 3.467181  | 0.768731  | H          | -2.578457    | -3.454094 | 1.660410  |
| N  | -0.525641 | 3.915477  | -0.299242 | H          | -5.106296    | 1.830691  | 1.620886  |
| C  | -0.173956 | 5.343560  | -0.494566 | H          | -2.342080    | 1.367545  | 3.662714  |
| C  | -1.539518 | 5.995448  | -0.827052 | H          | -1.655874    | 1.938921  | 2.119322  |
| C  | -2.332223 | 4.841456  | -1.500601 | H          | -3.194205    | 2.615871  | 2.737748  |
| C  | -1.924419 | 3.603958  | -0.665764 | C          | 4.895898     | -1.175093 | 1.378810  |
| C  | 0.025301  | -0.024129 | -2.276361 | H          | 4.557730     | -3.203734 | 0.739004  |
| C  | -1.318408 | 0.196715  | -2.774210 | H          | 0.959404     | -3.337440 | 0.782269  |
| C  | -2.193033 | -0.830256 | -2.931250 | H          | 2.457755     | -4.284785 | 0.633741  |
| C  | -1.828341 | -2.187361 | -2.613760 | H          | 1.705895     | -4.053734 | 2.218912  |
| C  | -0.542701 | -2.439490 | -2.047353 | H          | 4.906601     | 0.833296  | 2.143238  |
| C  | 0.357489  | -1.334433 | -1.796489 | H          | 1.421114     | 1.039660  | 3.405643  |
| H  | 0.533929  | 5.454525  | -1.324504 | H          | 3.069855     | 1.683515  | 3.582492  |
| H  | 0.291776  | 5.740474  | 0.410420  | H          | 2.127778     | 1.999741  | 2.104653  |
| H  | -1.436408 | 6.872381  | -1.470980 | C          | -6.744848    | 0.185488  | 0.186509  |
| H  | -2.043658 | 6.291075  | 0.099654  | C          | 6.357888     | -1.156847 | 0.974167  |
| H  | -1.992122 | 4.717894  | -2.535075 | H          | -7.341935    | 0.710239  | 0.940407  |
| H  | -3.412463 | 5.008374  | -1.496984 | H          | -6.701241    | 0.819290  | -0.708469 |
| H  | -2.554631 | 3.507480  | 0.226807  | H          | -7.262973    | -0.741003 | -0.079910 |
| H  | -1.981003 | 2.667638  | -1.222919 | H          | 6.955570     | -0.566977 | 1.677149  |
| H  | -1.594907 | 1.208982  | -3.047979 | H          | 6.770613     | -2.169869 | 0.929916  |
| H  | -3.186042 | -0.648415 | -3.330066 | H          | 6.452976     | -0.702192 | -0.019899 |
| H  | 1.391554  | -1.570366 | -1.564052 |            |              |           |           |
| C  | -0.160658 | -3.781731 | -1.816447 |            |              |           |           |
| H  | 0.830044  | -3.982412 | -1.425332 |            |              |           |           |
| C  | -2.692090 | -3.270011 | -2.888130 |            |              |           |           |
| H  | -3.667211 | -3.063870 | -3.317573 |            |              |           |           |
| C  | -1.023017 | -4.829201 | -2.099672 |            |              |           |           |
| H  | -0.709571 | -5.851179 | -1.919250 |            |              |           |           |
| C  | -2.300844 | -4.574117 | -2.632869 |            |              |           |           |
| H  | -2.968298 | -5.398352 | -2.855637 |            |              |           |           |
| C  | 2.378680  | 0.958793  | -1.992902 |            |              |           |           |
| C  | 3.176936  | 1.837419  | -1.234355 |            |              |           |           |
| C  | 3.018540  | 0.060093  | -2.871384 |            |              |           |           |
| C  | 4.566623  | 1.804174  | -1.348709 |            |              |           |           |
| H  | 2.702166  | 2.528677  | -0.544325 |            |              |           |           |
| C  | 4.408367  | 0.029569  | -2.976304 |            |              |           |           |
| H  | 2.417761  | -0.591548 | -3.495223 |            |              |           |           |
| C  | 5.190713  | 0.903594  | -2.216038 |            |              |           |           |
| H  | 5.163924  | 2.489484  | -0.757056 |            |              |           |           |
| H  | 4.879500  | -0.660420 | -3.668043 |            |              |           |           |
| H  | 6.271077  | 0.893358  | -2.312509 |            |              |           |           |
| H  | 0.488708  | 2.064441  | -2.067790 |            |              |           |           |
| Ni | 0.149019  | 0.209489  | -0.214606 |            |              |           |           |
| C  | -0.239878 | -0.728842 | 1.461005  |            |              |           |           |
| N  | -1.419476 | -0.884103 | 2.111076  |            |              |           |           |
| N  | 0.750196  | -1.149968 | 2.286455  |            |              |           |           |
| C  | -2.738480 | -0.599623 | 1.607561  |            |              |           |           |
| C  | -1.270132 | -1.441162 | 3.504554  |            |              |           |           |
| C  | 2.158424  | -1.142237 | 1.982790  |            |              |           |           |
| C  | 0.263844  | -1.625736 | 3.627842  |            |              |           |           |
| C  | -3.440221 | -1.608098 | 0.927816  |            |              |           |           |
| C  | -3.339225 | 0.643348  | 1.879675  |            |              |           |           |
| H  | -1.816038 | -2.384249 | 3.583018  |            |              |           |           |
| H  | -1.666733 | -0.727719 | 4.229949  |            |              |           |           |
| C  | 2.743738  | -2.311346 | 1.459305  |            |              |           |           |
| C  | 2.937701  | -0.005542 | 2.261051  |            |              |           |           |
| H  | 0.700891  | -1.007639 | 4.415466  |            |              |           |           |
| H  | 0.551197  | -2.668805 | 3.779300  |            |              |           |           |
| C  | -4.737160 | -1.340101 | 0.476031  |            |              |           |           |
| C  | -2.810257 | -2.968045 | 0.704493  |            |              |           |           |
| C  | -4.638302 | 0.872901  | 1.415729  |            |              |           |           |
| C  | -2.587199 | 1.709427  | 2.649273  |            |              |           |           |
| C  | 4.106094  | -2.309114 | 1.155920  |            |              |           |           |
| C  | 1.916160  | -3.566650 | 1.257280  |            |              |           |           |
| C  | 4.302666  | -0.046637 | 1.946765  |            |              |           |           |
| C  | 2.353541  | 1.249253  | 2.875722  |            |              |           |           |
| C  | -5.345914 | -0.102674 | 0.703846  |            |              |           |           |
|    |           |           |           | <b>*2a</b> |              |           |           |
|    |           |           |           | SCF done:  | -2150.971052 |           |           |
|    |           |           |           | C          | -5.643006    | -0.802209 | -0.558416 |
|    |           |           |           | C          | -6.177979    | 0.527915  | -0.569650 |
|    |           |           |           | C          | -5.309776    | 1.607750  | -0.251069 |
|    |           |           |           | C          | -3.987060    | 1.384168  | 0.059855  |
|    |           |           |           | C          | -3.446080    | 0.068509  | 0.067732  |
|    |           |           |           | C          | -4.271856    | -0.995728 | -0.237906 |
|    |           |           |           | C          | -6.506694    | -1.889299 | -0.871987 |
|    |           |           |           | C          | -7.832899    | -1.674140 | -1.182645 |
|    |           |           |           | C          | -8.360900    | -0.357234 | -1.193075 |
|    |           |           |           | C          | -7.550020    | 0.717171  | -0.892423 |
|    |           |           |           | C          | -1.961989    | -0.094213 | 0.348980  |
|    |           |           |           | Ni         | 0.765739     | 0.269377  | -0.237609 |
|    |           |           |           | O          | 0.405280     | -0.989314 | 1.478952  |
|    |           |           |           | C          | -0.614847    | -1.691547 | 1.560899  |
|    |           |           |           | O          | -1.820459    | -1.369993 | 1.054064  |
|    |           |           |           | N          | -0.634244    | -2.883270 | 2.196542  |
|    |           |           |           | C          | -1.819083    | -3.740012 | 2.367090  |
|    |           |           |           | C          | -1.343562    | -4.785518 | 3.388945  |
|    |           |           |           | C          | 0.166613     | -4.900235 | 3.109950  |
|    |           |           |           | C          | 0.583637     | -3.456485 | 2.788336  |
|    |           |           |           | C          | -1.080337    | -0.063524 | -0.896312 |
|    |           |           |           | C          | -1.116764    | -1.175528 | -1.810941 |
|    |           |           |           | C          | -0.768786    | -1.039160 | -3.137126 |
|    |           |           |           | C          | -0.409910    | 0.235908  | -3.664128 |
|    |           |           |           | C          | -0.334212    | 1.323352  | -2.822888 |
|    |           |           |           | C          | -0.587154    | 1.201369  | -1.416240 |
|    |           |           |           | H          | -5.707452    | 2.620523  | -0.250422 |
|    |           |           |           | H          | -3.340147    | 2.224246  | 0.302253  |
|    |           |           |           | H          | -3.877624    | -2.007829 | -0.232482 |
|    |           |           |           | H          | -6.100112    | -2.898546 | -0.866706 |
|    |           |           |           | H          | -8.479576    | -2.514484 | -1.422675 |
|    |           |           |           | H          | -9.407589    | -0.198660 | -1.440202 |
|    |           |           |           | H          | -7.951688    | 1.728459  | -0.899898 |
|    |           |           |           | H          | -1.645189    | 0.701952  | 1.031545  |
|    |           |           |           | H          | -2.093999    | -4.205720 | 1.410763  |
|    |           |           |           | H          | -2.674882    | -3.153601 | 2.712424  |
|    |           |           |           | H          | -1.875220    | -5.736648 | 3.285813  |
|    |           |           |           | H          | -1.512226    | -4.415661 | 4.408257  |
|    |           |           |           | H          | 0.341616     | -5.543811 | 2.238615  |
|    |           |           |           | H          | 0.728979     | -5.316201 | 3.951761  |
|    |           |           |           | H          | 0.862810     | -2.900976 | 3.694396  |
|    |           |           |           | H          | 1.416794     | -3.387309 | 2.083894  |
|    |           |           |           | H          | -1.450824    | -2.144667 | -1.444632 |

|                                    |           |           |           |   |           |           |           |
|------------------------------------|-----------|-----------|-----------|---|-----------|-----------|-----------|
| H                                  | -0.797650 | -1.905964 | -3.793902 | N | 1.909698  | -0.719682 | 2.542280  |
| H                                  | -0.202373 | 0.343777  | -4.726289 | C | 2.845681  | -1.809190 | 2.857692  |
| H                                  | -0.086047 | 2.304923  | -3.223534 | C | 3.149779  | -1.587874 | 4.348849  |
| H                                  | -0.781914 | 2.122857  | -0.866882 | C | 2.992169  | -0.066171 | 4.525937  |
| N                                  | 3.694478  | 0.374349  | -0.281474 | C | 1.802343  | 0.275383  | 3.614881  |
| N                                  | 2.821447  | 2.293735  | 0.269843  | C | 0.642207  | -0.286474 | -1.847394 |
| C                                  | 2.505616  | 1.012006  | -0.081187 | C | 1.072185  | 0.990861  | -2.390646 |
| C                                  | 1.874843  | 3.282100  | 0.691366  | C | 0.358801  | 1.635908  | -3.367629 |
| C                                  | 1.511058  | 4.304963  | -0.204313 | C | -0.840602 | 1.067778  | -3.906311 |
| C                                  | 1.354538  | 3.247342  | 2.000654  | C | -1.340169 | -0.089165 | -3.368904 |
| C                                  | 0.613570  | 5.289633  | 0.228978  | C | -0.705860 | -0.734058 | -2.245399 |
| C                                  | 0.459824  | 4.251976  | 2.388885  | H | 5.804066  | -2.630704 | -2.520083 |
| C                                  | 0.078715  | 5.283838  | 1.521841  | H | 3.358221  | -2.878755 | -2.372546 |
| H                                  | 0.322649  | 6.076433  | -0.465134 | H | 3.077144  | 0.808890  | -0.172457 |
| H                                  | 0.050825  | 4.226840  | 3.397913  | H | 5.120448  | 2.097723  | 0.340957  |
| C                                  | 3.838085  | -0.983597 | -0.715216 | H | 7.577733  | 2.353046  | 2.210235  |
| C                                  | 3.754776  | -1.296771 | -2.086244 | H | 8.958355  | 0.639256  | -0.964602 |
| C                                  | 4.103540  | -1.979634 | 0.241811  | H | 7.877840  | -1.328553 | -2.006279 |
| C                                  | 3.944540  | -2.626665 | -2.477524 | H | 1.290992  | -2.272007 | -1.457314 |
| C                                  | 4.288759  | -3.297667 | -0.197162 | H | 3.750893  | -1.726723 | 2.241329  |
| C                                  | 4.216396  | -3.641458 | -1.551151 | H | 2.391229  | -2.782105 | 2.649369  |
| H                                  | 3.874252  | -2.875869 | -3.535210 | H | 4.142343  | -1.954699 | 4.629610  |
| H                                  | 4.493220  | -4.073165 | 0.539573  | H | 2.410845  | -2.115588 | 4.965777  |
| C                                  | 3.435484  | -0.233678 | -3.109756 | H | 3.894268  | 0.448735  | 4.171694  |
| H                                  | 3.490185  | -0.643459 | -4.123656 | H | 2.821814  | 0.232881  | 5.565432  |
| H                                  | 2.426263  | 0.164119  | -2.954488 | H | 0.844855  | 0.171895  | 4.146928  |
| H                                  | 4.131405  | 0.612346  | -3.051315 | H | 1.842635  | 1.288681  | 3.204427  |
| C                                  | 4.443245  | -5.064670 | -2.010560 | H | 2.017570  | 1.414307  | -2.071524 |
| H                                  | 5.418368  | -5.172817 | -2.504572 | H | 0.737016  | 2.572390  | -3.771474 |
| H                                  | 4.421068  | -5.765529 | -1.168855 | H | -1.339331 | 1.552962  | -4.742223 |
| H                                  | 3.679693  | -5.379494 | -2.732199 | H | -2.234805 | -0.544945 | -3.789693 |
| C                                  | 4.155340  | -1.648312 | 1.715293  | H | -0.952413 | -1.786719 | -2.087695 |
| H                                  | 4.937879  | -0.914234 | 1.945734  | N | -3.166909 | 1.443005  | 0.536730  |
| H                                  | 3.203186  | -1.223979 | 2.053036  | N | -3.506450 | -0.707248 | 0.397492  |
| H                                  | 4.364261  | -2.546316 | 2.307000  | C | -2.583427 | 0.269121  | 0.181713  |
| C                                  | 2.057991  | 4.334776  | -1.612338 | C | -3.295334 | -2.111470 | 0.201538  |
| H                                  | 1.935009  | 3.363975  | -2.103458 | C | -3.793223 | -2.727842 | -0.961393 |
| H                                  | 1.546078  | 5.094713  | -2.211918 | C | -2.643712 | -2.863599 | 1.198923  |
| H                                  | 3.130176  | 4.572541  | -1.629050 | C | -3.605157 | -4.107305 | -1.120013 |
| C                                  | -0.859792 | 6.376934  | 1.982374  | C | -2.478292 | -4.238016 | 0.996098  |
| H                                  | -1.625199 | 5.988899  | 2.664422  | C | -2.946072 | -4.879287 | -0.157673 |
| H                                  | -0.315793 | 7.165798  | 2.520080  | H | -3.981103 | -4.587308 | -2.022130 |
| H                                  | -1.369545 | 6.850657  | 1.136113  | H | -1.969173 | -4.822447 | 1.760695  |
| C                                  | 1.727993  | 2.145327  | 2.964752  | C | -2.572323 | 2.746964  | 0.444715  |
| H                                  | 1.358511  | 1.174392  | 2.615612  | C | -2.738419 | 3.501124  | -0.732009 |
| H                                  | 2.815340  | 2.053605  | 3.077356  | C | -1.894855 | 3.275369  | 1.559260  |
| H                                  | 1.305253  | 2.340996  | 3.956054  | C | -2.201391 | 4.793076  | -0.776130 |
| C                                  | 4.876276  | 1.253635  | -0.171838 | C | -1.376386 | 4.573111  | 1.468315  |
| H                                  | 5.325130  | 1.419433  | -1.161079 | C | -1.514379 | 5.346506  | 0.310408  |
| H                                  | 5.641010  | 0.807076  | 0.472917  | H | -2.322282 | 5.379759  | -1.685241 |
| C                                  | 4.271056  | 2.537188  | 0.417996  | H | -0.850088 | 4.988226  | 2.326377  |
| H                                  | 4.530441  | 2.673667  | 1.477384  | C | -3.461570 | 2.933023  | -1.929862 |
| H                                  | 4.578470  | 3.439429  | -0.121656 | H | -3.478720 | 3.658507  | -2.749688 |
| H                                  |           |           |           | H | -2.966646 | 2.025766  | -2.291309 |
| H                                  |           |           |           | H | -4.502456 | 2.672884  | -1.697408 |
| H                                  |           |           |           | C | -0.915658 | 6.732698  | 0.225934  |
| H                                  |           |           |           | H | -0.868212 | 7.210007  | 1.211292  |
| H                                  |           |           |           | H | 0.108801  | 6.696757  | -0.169590 |
| H                                  |           |           |           | H | -1.497813 | 7.381895  | -0.437886 |
| C                                  |           |           |           | C | -1.701357 | 2.461188  | 2.816209  |
| C                                  |           |           |           | H | -2.649598 | 2.067636  | 3.203118  |
| H                                  |           |           |           | H | -1.043504 | 1.607651  | 2.618837  |
| H                                  |           |           |           | H | -1.248786 | 3.072468  | 3.604530  |
| C                                  |           |           |           | C | -4.521037 | -1.934221 | -2.021665 |
| C                                  |           |           |           | H | -4.027082 | -0.977455 | -2.214034 |
| H                                  |           |           |           | H | -4.567964 | -2.494107 | -2.961570 |
| H                                  |           |           |           | H | -5.556231 | -1.714962 | -1.724520 |
| H                                  |           |           |           | C | -2.723464 | -6.360679 | -0.364440 |
| C                                  |           |           |           | H | -3.445108 | -6.779998 | -1.074129 |
| H                                  |           |           |           | H | -1.718743 | -6.557621 | -0.762810 |
| H                                  |           |           |           | H | -2.812758 | -6.914815 | 0.577147  |
| <b>N<sub>TS</sub><sub>3a</sub></b> |           |           |           |   |           |           |           |
| SCF done: -2150.951504             |           |           |           |   |           |           |           |
| C                                  | 5.072359  | 0.229384  | -0.758833 | H |           |           |           |
| C                                  | 5.868112  | -0.755315 | -1.433310 | H |           |           |           |
| C                                  | 5.209558  | -1.873899 | -2.012608 | H |           |           |           |
| C                                  | 3.841872  | -2.011267 | -1.929581 | C |           |           |           |
| C                                  | 3.038601  | -1.031334 | -1.277984 | H |           |           |           |
| C                                  | 3.664510  | 0.062711  | -0.701774 | H |           |           |           |
| C                                  | 5.724652  | 1.349611  | -0.168065 | H |           |           |           |
| C                                  | 7.093846  | 1.491270  | -0.242607 | C |           |           |           |
| C                                  | 7.879565  | 0.516613  | -0.911354 | H |           |           |           |
| C                                  | 7.278109  | -0.580195 | -1.492236 | H |           |           |           |
| C                                  | 1.563882  | -1.240585 | -1.253556 | H |           |           |           |
| Ni                                 | -0.798138 | 0.040176  | -0.430415 | C |           |           |           |
| O                                  | 0.414179  | 0.336170  | 1.195542  | H |           |           |           |
| C                                  | 1.199767  | -0.638898 | 1.382071  | H |           |           |           |
| O                                  | 1.379159  | -1.614901 | 0.538323  | H |           |           |           |

|                        |           |           |           |                         |           |           |           |
|------------------------|-----------|-----------|-----------|-------------------------|-----------|-----------|-----------|
| C                      | -2.130557 | -2.209591 | 2.460112  | C                       | 0.130152  | 2.627918  | -1.269439 |
| H                      | -1.376678 | -1.449507 | 2.232614  | C                       | -0.163662 | 3.456830  | -0.172975 |
| H                      | -2.935335 | -1.708831 | 3.013610  | C                       | -0.790799 | 2.448830  | -2.320128 |
| H                      | -1.681455 | -2.954107 | 3.125339  | C                       | -1.421479 | 4.074650  | -0.125741 |
| C                      | -4.564860 | 1.305518  | 0.997917  | C                       | -2.028630 | 3.092723  | -2.231121 |
| H                      | -5.245637 | 1.837977  | 0.322593  | C                       | -2.367914 | 3.903864  | -1.140496 |
| H                      | -4.683422 | 1.734771  | 1.999372  | H                       | -1.658545 | 4.714082  | 0.722706  |
| C                      | -4.777620 | -0.218054 | 0.972215  | H                       | -2.750346 | 2.950397  | -3.033770 |
| H                      | -4.931437 | -0.640543 | 1.973461  | C                       | 0.842485  | 3.697941  | 0.928081  |
| H                      | -5.627146 | -0.516529 | 0.348177  | H                       | 0.457670  | 4.427354  | 1.648024  |
| <b>N4a</b>             |           |           |           | H                       | 1.076997  | 2.779519  | 1.474498  |
| SCF done: -2151.003332 |           |           |           | H                       | 1.788996  | 4.089465  | 0.533883  |
| C                      | -4.079505 | -0.373093 | 1.601848  | C                       | -3.720811 | 4.576166  | -1.072587 |
| C                      | -4.689270 | -1.666167 | 1.718388  | H                       | -3.909113 | 5.186585  | -1.964791 |
| C                      | -3.840439 | -2.803280 | 1.817412  | H                       | -4.529496 | 3.836252  | -1.012616 |
| C                      | -2.471226 | -2.667311 | 1.816899  | H                       | -3.799673 | 5.229316  | -0.196970 |
| C                      | -1.845383 | -1.385123 | 1.729745  | C                       | -0.463759 | 1.577624  | -3.508328 |
| C                      | -2.663993 | -0.269849 | 1.605703  | H                       | 0.369509  | 1.982061  | -4.098192 |
| C                      | -4.920599 | 0.770312  | 1.482057  | H                       | -0.188646 | 0.572262  | -3.176061 |
| C                      | -6.293906 | 0.644417  | 1.487202  | H                       | -1.326370 | 1.499596  | -4.177546 |
| C                      | -6.895037 | -0.635208 | 1.609406  | C                       | 5.282886  | 1.517188  | 0.864196  |
| C                      | -6.107520 | -1.762804 | 1.720716  | H                       | 4.330329  | 2.036417  | 1.002366  |
| C                      | -0.371736 | -1.316478 | 1.759625  | H                       | 5.821423  | 1.529160  | 1.817835  |
| Ni                     | 0.697271  | -0.195798 | 0.420278  | H                       | 5.881335  | 2.107852  | 0.156250  |
| O                      | -0.496212 | -0.598047 | -1.026484 | C                       | 6.802043  | -3.297436 | 0.845203  |
| C                      | -0.648285 | -1.861912 | -1.332004 | H                       | 6.365480  | -3.815340 | 1.710094  |
| O                      | 0.100654  | -2.793664 | -0.966637 | H                       | 6.997222  | -4.055056 | 0.078099  |
| N                      | -1.728128 | -2.133532 | -2.147127 | H                       | 7.763909  | -2.881203 | 1.164966  |
| C                      | -2.066842 | -3.517121 | -2.496953 | C                       | 2.973506  | -1.916768 | -2.134138 |
| C                      | -3.365391 | -3.371981 | -3.306039 | H                       | 2.715616  | -1.069630 | -2.777988 |
| C                      | -4.026904 | -2.127455 | -2.685708 | H                       | 3.365724  | -2.720075 | -2.767916 |
| C                      | -2.832125 | -1.200846 | -2.404225 | H                       | 2.039583  | -2.275177 | -1.679514 |
| C                      | 0.384669  | -0.400638 | 2.566284  | C                       | 2.490935  | 2.723211  | -2.132564 |
| C                      | -0.152153 | 0.588566  | 3.453980  | H                       | 2.727846  | 3.677694  | -1.643784 |
| C                      | 0.675535  | 1.476488  | 4.104648  | H                       | 2.165342  | 2.936347  | -3.154070 |
| C                      | 2.078253  | 1.466627  | 3.887494  | C                       | 3.647089  | 1.721856  | 1.721856  |
| C                      | 2.625180  | 0.547036  | 3.016666  | H                       | 3.784176  | 1.168325  | -3.002628 |
| C                      | 1.798074  | -0.378322 | 2.327246  | H                       | 4.601087  | 2.183284  | -1.797053 |
| H                      | -4.290817 | -3.791202 | 1.892652  | <b>NTS<sub>3c</sub></b> |           |           |           |
| H                      | -1.838978 | -3.549259 | 1.883418  | SCF done: -2150.946982  |           |           |           |
| H                      | -2.220521 | 0.713424  | 1.471491  | C                       | -4.323618 | 0.683420  | 1.334609  |
| H                      | -4.457415 | 1.750431  | 1.387793  | C                       | -5.025634 | 0.755993  | 0.087682  |
| H                      | -6.922665 | 1.527085  | 1.398090  | C                       | -4.351115 | 1.303359  | -1.040395 |
| H                      | -7.978608 | -0.723377 | 1.613934  | C                       | -3.058909 | 1.763522  | -0.940124 |
| H                      | -6.565196 | -2.745895 | 1.813130  | C                       | -2.353717 | 1.699473  | 0.295263  |
| H                      | 0.118462  | -2.266548 | 1.547629  | C                       | -2.985392 | 1.162352  | 1.398707  |
| H                      | -2.220184 | -4.117135 | -1.588219 | C                       | -4.991292 | 0.141241  | 2.467394  |
| H                      | -1.255291 | -3.987511 | -3.062377 | C                       | -6.293140 | -0.307407 | 2.375366  |
| H                      | -3.992693 | -4.268513 | -3.252720 | C                       | -6.988371 | -0.233128 | 1.141588  |
| H                      | -3.134329 | -3.187934 | -4.363967 | C                       | -6.366286 | 0.287411  | 0.024804  |
| H                      | -4.519930 | -2.394276 | -1.742567 | C                       | -0.943910 | 2.254881  | 0.417670  |
| H                      | -4.775960 | -1.663376 | -3.337090 | Ni                      | 0.452946  | -0.259103 | -0.223556 |
| H                      | -2.615030 | -0.566525 | -3.276897 | O                       | 1.688442  | 1.799583  | 1.188679  |
| H                      | -2.986027 | -0.542465 | -1.545630 | C                       | 1.446729  | 1.492653  | 0.018528  |
| H                      | -1.218390 | 0.586607  | 3.655706  | O                       | -0.068818 | 1.568264  | -0.501016 |
| H                      | 0.249545  | 2.185709  | 4.810959  | N                       | 2.265532  | 1.821947  | -1.038564 |
| H                      | 2.714613  | 2.164190  | 4.426038  | C                       | 2.029577  | 1.466942  | -2.438797 |
| H                      | 3.699877  | 0.492791  | 2.876835  | C                       | 3.430327  | 1.545894  | -3.070858 |
| H                      | 2.269442  | -1.229890 | 1.835485  | C                       | 4.153726  | 2.593251  | -2.203853 |
| N                      | 1.429475  | 2.021616  | -1.374764 | C                       | 3.630087  | 2.302383  | -0.789264 |
| N                      | 3.191559  | 0.792244  | -1.004113 | C                       | -0.896695 | 3.759148  | 0.160072  |
| C                      | 1.882752  | 0.947034  | -0.691179 | C                       | -0.587824 | 4.286931  | -1.099623 |
| C                      | 4.079082  | -0.241396 | -0.548473 | C                       | -0.587551 | 5.669205  | -1.310746 |
| C                      | 5.093649  | 0.099159  | 0.371510  | C                       | -0.894952 | 6.542726  | -0.264061 |
| C                      | 3.989301  | -1.541359 | -1.084765 | C                       | -1.198410 | 6.023361  | 0.998691  |
| C                      | 5.968533  | -0.903834 | 0.803597  | C                       | -1.196176 | 4.642543  | 1.206335  |
| C                      | 4.889438  | -2.509514 | -0.616162 | H                       | -4.878760 | 1.358675  | -1.990462 |
| C                      | 5.873118  | -2.219751 | 0.333889  | H                       | -2.564463 | 2.186187  | -1.809715 |
| H                      | 6.746339  | -0.648254 | 1.521528  | H                       | -2.456287 | 1.102335  | 2.348471  |
| H                      | 4.818362  | -3.518590 | -1.018260 | H                       | -4.458748 | 0.091252  | 3.415089  |

|                       |              |           |           |    |           |           |           |
|-----------------------|--------------|-----------|-----------|----|-----------|-----------|-----------|
| H                     | -6.792484    | -0.715045 | 3.250874  | C  | -4.264303 | -1.369878 | 1.184289  |
| H                     | -8.015567    | -0.584013 | 1.080360  | C  | -3.671533 | -0.214596 | 0.727159  |
| H                     | -6.899897    | 0.351318  | -0.921540 | C  | -2.536117 | 0.339354  | 1.384935  |
| H                     | -0.579933    | 2.072277  | 1.433455  | C  | -2.027375 | -0.308179 | 2.493129  |
| H                     | 1.336717     | 2.180894  | -2.908457 | C  | -2.095621 | -2.182069 | 4.133962  |
| H                     | 1.577486     | 0.469807  | -2.515217 | C  | -2.685172 | -3.339361 | 4.600419  |
| H                     | 3.395064     | 1.811536  | -4.132942 | C  | -3.822386 | -3.875873 | 3.944496  |
| H                     | 3.935793     | 0.575800  | -2.983259 | C  | -4.345226 | -3.244006 | 2.834132  |
| H                     | 3.862324     | 3.605272  | -2.513045 | C  | -1.857942 | 1.601259  | 0.839899  |
| H                     | 5.245138     | 2.523652  | -2.266045 | Ni | 0.308201  | 0.279505  | -0.531819 |
| H                     | 4.233147     | 1.534266  | -0.286132 | O  | 1.429950  | 0.693531  | 1.896592  |
| H                     | 3.606345     | 3.185684  | -0.142791 | C  | 1.338565  | 1.158187  | 0.760225  |
| H                     | -0.332316    | 3.611932  | -1.910323 | O  | -1.155050 | 1.333616  | -0.342210 |
| H                     | -0.342438    | 6.063374  | -2.294421 | N  | 1.878778  | 2.352378  | 0.411247  |
| H                     | -0.891828    | 7.617520  | -0.427973 | C  | 1.684814  | 3.033846  | -0.878834 |
| H                     | -1.428514    | 6.693242  | 1.823737  | C  | 2.615310  | 4.252702  | -0.776191 |
| H                     | -1.423639    | 4.245724  | 2.193726  | C  | 2.598398  | 4.584158  | 0.727139  |
| N                     | 2.320536     | -2.414775 | 0.536656  | C  | 2.576515  | 3.201907  | 1.397558  |
| N                     | 0.290055     | -3.051736 | 0.044756  | C  | -2.868679 | 2.734737  | 0.620967  |
| C                     | 1.107571     | -1.962011 | 0.119296  | C  | -3.087817 | 3.269880  | -0.653400 |
| C                     | -1.050436    | -3.047219 | -0.467719 | C  | -4.005123 | 4.310735  | -0.841730 |
| C                     | -2.128834    | -3.010106 | 0.438134  | C  | -4.711354 | 4.834725  | 0.244172  |
| C                     | -1.269495    | -3.145980 | -1.854817 | C  | -4.494578 | 4.307812  | 1.523076  |
| C                     | -3.430062    | -3.077585 | -0.069981 | C  | -3.582052 | 3.266708  | 1.706367  |
| C                     | -2.590252    | -3.210039 | -2.316862 | H  | -5.138991 | -1.774944 | 0.677788  |
| C                     | -3.682500    | -3.185278 | -1.443384 | H  | -4.071368 | 0.295030  | -0.145602 |
| H                     | -4.267788    | -3.032745 | 0.623232  | H  | -1.144175 | 0.089993  | 2.989324  |
| H                     | -2.767091    | -3.278245 | -3.388871 | H  | -1.224461 | -1.766231 | 4.636010  |
| C                     | 3.491649     | -1.639735 | 0.829660  | H  | -2.280809 | -3.843114 | 5.475101  |
| C                     | 3.611482     | -0.973599 | 2.065328  | H  | -4.282656 | -4.786058 | 4.321356  |
| C                     | 4.550474     | -1.647162 | -0.097779 | H  | -5.220061 | -3.652135 | 2.331052  |
| C                     | 4.817183     | -0.323403 | 2.352175  | H  | -1.166242 | 1.944405  | 1.627439  |
| C                     | 5.737816     | -0.982108 | 0.234967  | H  | 0.635202  | 3.327806  | -0.997949 |
| C                     | 5.893067     | -0.318301 | 1.456740  | H  | 1.942238  | 2.370582  | -1.711568 |
| H                     | 4.912587     | 0.200521  | 3.301681  | H  | 2.279408  | 5.083221  | -1.405667 |
| H                     | 6.559213     | -0.984364 | -0.479689 | H  | 3.631891  | 3.981738  | -1.090321 |
| C                     | 2.468920     | -0.913413 | 3.049057  | H  | 1.684636  | 5.137369  | 0.977702  |
| H                     | 2.831598     | -0.642199 | 4.046252  | H  | 3.454311  | 5.189194  | 1.044820  |
| H                     | 1.749933     | -0.150355 | 2.728599  | H  | 3.589364  | 2.814105  | 1.574012  |
| H                     | 1.935127     | -1.866814 | 3.126435  | H  | 2.042341  | 3.183347  | 2.352020  |
| C                     | 7.183986     | 0.387462  | 1.807182  | H  | -2.524691 | 2.860879  | -1.486149 |
| H                     | 7.899613     | 0.348111  | 0.978882  | H  | -4.165049 | 4.714535  | -1.839531 |
| H                     | 7.007966     | 1.443058  | 2.049387  | H  | -5.421836 | 5.645172  | 0.098649  |
| H                     | 7.662608     | -0.068639 | 2.683589  | H  | -5.036666 | 4.708233  | 2.376967  |
| C                     | 4.421008     | -2.348402 | -1.430901 | H  | -3.424037 | 2.858082  | 2.703012  |
| H                     | 4.389590     | -3.440883 | -1.321458 | N  | 2.756319  | -1.508143 | -0.905361 |
| H                     | 3.503063     | -2.053029 | -1.950594 | N  | 1.020166  | -1.817475 | -2.191633 |
| H                     | 5.273598     | -2.112211 | -2.076109 | C  | 1.516269  | -1.055827 | -1.185860 |
| C                     | -1.891934    | -2.876520 | 1.924256  | C  | -0.286493 | -1.650654 | -2.766694 |
| H                     | -1.282007    | -1.993932 | 2.148161  | C  | -1.382079 | -2.328886 | -2.197526 |
| H                     | -2.842159    | -2.782519 | 2.458991  | C  | -0.436036 | -0.850645 | -3.917217 |
| H                     | -1.362219    | -3.746149 | 2.334983  | C  | -2.635055 | -2.184767 | -2.804631 |
| C                     | -5.099886    | -3.285099 | -1.959932 | C  | -1.708623 | -0.738763 | -4.486070 |
| H                     | -5.146720    | -3.102159 | -3.038969 | C  | -2.820933 | -1.394330 | -3.943764 |
| H                     | -5.518727    | -4.283927 | -1.776021 | H  | -3.488266 | -2.699370 | -2.367578 |
| H                     | -5.755478    | -2.561421 | -1.462067 | H  | -1.835119 | -0.118650 | -5.371680 |
| C                     | -0.117819    | -3.160413 | -2.832545 | C  | 3.670368  | -1.044821 | 0.102819  |
| H                     | 0.480574     | -2.245697 | -2.745565 | C  | 3.583479  | -1.565343 | 1.407868  |
| H                     | 0.559710     | -4.006012 | -2.659396 | C  | 4.691603  | -0.150958 | -0.263094 |
| H                     | -0.484278    | -3.234713 | -3.861505 | C  | 4.548735  | -1.172130 | 2.339723  |
| C                     | 2.321506     | -3.852421 | 0.887038  | C  | 5.630013  | 0.220595  | 0.708685  |
| H                     | 2.408786     | -3.971367 | 1.975524  | C  | 5.577671  | -0.280659 | 2.013571  |
| H                     | 3.169428     | -4.366554 | 0.423922  | H  | 4.484307  | -1.562382 | 3.353851  |
| C                     | 0.964143     | -4.328259 | 0.351751  | H  | 6.422129  | 0.915400  | 0.435030  |
| H                     | 1.059708     | -4.939686 | -0.555822 | C  | 2.454587  | -2.477931 | 1.818857  |
| H                     | 0.393632     | -4.905067 | 1.087475  | H  | 2.659255  | -2.931569 | 2.793874  |
|                       |              |           |           | H  | 1.525639  | -1.902045 | 1.900367  |
|                       |              |           |           | H  | 2.285096  | -3.287582 | 1.099540  |
|                       |              |           |           | C  | 6.591555  | 0.138352  | 3.054124  |
|                       |              |           |           | H  | 7.410193  | 0.713321  | 2.608195  |
|                       |              |           |           | H  | 6.127769  | 0.764126  | 3.827998  |
| <b><sup>14</sup>C</b> |              |           |           |    |           |           |           |
| SCF done:             | -2150.978144 |           |           |    |           |           |           |
| C                     | -2.611293    | -1.506682 | 2.993005  |    |           |           |           |
| C                     | -3.758469    | -2.051736 | 2.328166  |    |           |           |           |

|   |           |           |           |   |           |           |           |
|---|-----------|-----------|-----------|---|-----------|-----------|-----------|
| H | 7.027240  | -0.731204 | 3.561304  | H | -0.582714 | 6.120211  | -3.189863 |
| C | 4.787037  | 0.407983  | -1.664522 | H | -0.818401 | 7.357220  | -1.037631 |
| H | 5.040180  | -0.365999 | -2.401409 | N | -1.650957 | -2.625966 | 0.654568  |
| H | 3.840926  | 0.857894  | -1.983859 | N | 0.311325  | -3.120174 | -0.167604 |
| H | 5.565063  | 1.175941  | -1.721325 | C | -0.585824 | -2.104687 | -0.009232 |
| C | -1.232744 | -3.166287 | -0.948996 | C | 1.526419  | -3.024502 | -0.926028 |
| H | -1.076790 | -2.533630 | -0.066917 | C | 1.489335  | -3.159666 | -2.327307 |
| H | -2.134282 | -3.759842 | -0.771950 | C | 2.747202  | -2.853471 | -0.243046 |
| H | -0.380646 | -3.853172 | -1.009884 | C | 2.698563  | -3.108564 | -3.032782 |
| C | -4.192740 | -1.227040 | -4.556002 | C | 3.928543  | -2.811121 | -0.990879 |
| H | -4.132421 | -1.055905 | -5.636588 | C | 3.926576  | -2.933581 | -2.386087 |
| H | -4.818648 | -2.109729 | -4.384909 | H | 2.676969  | -3.207676 | -4.116657 |
| H | -4.714290 | -0.365841 | -4.116869 | H | 4.873500  | -2.670205 | -0.469090 |
| C | 0.738463  | -0.116861 | -4.522820 | C | -2.828607 | -1.934482 | 1.093178  |
| H | 1.225978  | 0.531751  | -3.786293 | C | -4.016108 | -2.093873 | 0.354373  |
| H | 1.503663  | -0.805514 | -4.904052 | C | -2.812089 | -1.194612 | 2.291949  |
| H | 0.412554  | 0.507890  | -5.360239 | C | -5.192212 | -1.509306 | 0.841697  |
| C | 3.145540  | -2.686177 | -1.718273 | C | -4.012851 | -0.630766 | 2.739100  |
| H | 3.314523  | -3.549416 | -1.064259 | C | -5.213910 | -0.780260 | 2.035526  |
| H | 4.077411  | -2.484609 | -2.256600 | H | -6.113280 | -1.631198 | 0.274209  |
| C | 1.940422  | -2.874411 | -2.656155 | H | -4.005039 | -0.055117 | 3.663296  |
| H | 2.194893  | -2.725956 | -3.712118 | C | -4.034310 | -2.870482 | -0.942566 |
| H | 1.472023  | -3.860170 | -2.557770 | H | -5.004551 | -2.769663 | -1.439905 |

**<sup>15</sup>N**

SCF done: -2150.936851

|    |           |           |           |
|----|-----------|-----------|-----------|
| C  | 1.166615  | 2.301363  | -1.146828 |
| Ni | -0.175814 | -0.402763 | -0.635225 |
| O  | -1.073506 | 1.698533  | 0.923275  |
| C  | -1.194746 | 1.277285  | -0.232601 |
| O  | 0.072481  | 1.357973  | -1.271099 |
| N  | -2.336020 | 1.470825  | -0.973745 |
| C  | -2.546435 | 1.082081  | -2.366814 |
| C  | -3.848661 | 1.810938  | -2.735843 |
| C  | -4.627663 | 1.838880  | -1.408322 |
| C  | -3.534329 | 2.048602  | -0.347372 |
| C  | 2.248573  | 1.967337  | -0.127512 |
| C  | 3.601700  | 2.142190  | -0.537229 |
| C  | 4.650928  | 1.898266  | 0.321061  |
| C  | 4.413539  | 1.461010  | 1.652502  |
| C  | 3.055758  | 1.282237  | 2.075383  |
| C  | 1.995513  | 1.540687  | 1.162690  |
| H  | -2.656811 | -0.010491 | -2.462469 |
| H  | -1.695419 | 1.384470  | -2.982419 |
| H  | -4.391789 | 1.312055  | -3.546096 |
| H  | -3.622061 | 2.833969  | -3.062079 |
| H  | -5.125537 | 0.875301  | -1.243800 |
| H  | -5.393240 | 2.621632  | -1.375814 |
| H  | -3.367856 | 3.114002  | -0.132021 |
| H  | -3.759635 | 1.549481  | 0.600015  |
| H  | 3.807577  | 2.474492  | -1.553007 |
| H  | 5.676839  | 2.034538  | -0.015374 |
| H  | 0.967535  | 1.411742  | 1.488473  |
| C  | 2.805928  | 0.855804  | 3.410703  |
| H  | 1.774450  | 0.728217  | 3.731934  |
| C  | 5.464768  | 1.198583  | 2.574260  |
| H  | 6.494266  | 1.334752  | 2.248524  |
| C  | 3.845675  | 0.614222  | 4.284136  |
| H  | 3.639254  | 0.292366  | 5.301988  |
| C  | 5.189575  | 0.784831  | 3.861061  |
| H  | 6.001905  | 0.591579  | 4.557433  |
| H  | 1.643588  | 2.213091  | -2.130987 |
| C  | 0.623805  | 3.728374  | -1.063824 |
| C  | 0.491458  | 4.434957  | 0.138458  |
| C  | 0.231593  | 4.355351  | -2.256889 |
| C  | -0.028300 | 5.732320  | 0.146774  |
| H  | 0.788636  | 3.969623  | 1.071624  |
| C  | -0.288258 | 5.651561  | -2.253694 |
| H  | 0.334368  | 3.818269  | -3.198167 |
| C  | -0.419904 | 6.345507  | -1.046775 |
| H  | -0.126156 | 6.264469  | 1.089928  |

**<sup>14</sup>d**

SCF done: -2150.976724

|    |           |           |           |
|----|-----------|-----------|-----------|
| C  | 1.430923  | 1.897435  | -1.590850 |
| Ni | -0.488806 | -0.196464 | -0.448009 |
| O  | -0.443512 | -0.424064 | 2.285744  |
| C  | -0.914123 | 0.221958  | 1.338884  |
| O  | 0.271231  | 1.160491  | -1.360675 |
| N  | -1.692324 | 1.311465  | 1.545040  |
| C  | -2.278524 | 2.184533  | 0.511578  |
| C  | -2.568294 | 3.482294  | 1.279175  |
| C  | -2.921409 | 2.984106  | 2.692440  |
| C  | -1.958507 | 1.805922  | 2.912105  |
| C  | 2.662849  | 1.536001  | -0.755585 |
| C  | 3.945253  | 1.885827  | -1.270317 |
| C  | 5.098176  | 1.629217  | -0.563716 |
| C  | 5.045348  | 1.006552  | 0.715372  |
| C  | 3.761754  | 0.649766  | 1.242503  |
| C  | 2.592254  | 0.924961  | 0.477934  |
| H  | -3.208040 | 1.742301  | 0.127729  |

|   |           |           |           |                        |           |           |           |
|---|-----------|-----------|-----------|------------------------|-----------|-----------|-----------|
| H | -1.581150 | 2.312748  | -0.318269 | H                      | 0.643424  | -4.248000 | 2.006667  |
| H | -3.368782 | 4.068431  | 0.815590  | H                      | 2.084954  | -3.399170 | 2.569583  |
| H | -1.667302 | 4.106715  | 1.306751  | C                      | -2.725301 | -3.770214 | -0.267225 |
| H | -3.960195 | 2.630201  | 2.716652  | H                      | -3.316441 | -4.002993 | -1.161706 |
| H | -2.813692 | 3.755072  | 3.462967  | H                      | -3.261252 | -4.158794 | 0.603581  |
| H | -1.016254 | 2.121958  | 3.378840  | C                      | -1.278734 | -4.287343 | -0.357843 |
| H | -2.377434 | 1.007135  | 3.532873  | H                      | -0.980019 | -4.861335 | 0.526176  |
| H | 4.007155  | 2.368524  | -2.244261 | H                      | -1.099106 | -4.907075 | -1.242773 |
| H | 6.067370  | 1.902216  | -0.977359 |                        |           |           |           |
| H | 1.630788  | 0.634801  | 0.889160  |                        |           |           |           |
| C | 3.692354  | 0.034466  | 2.523904  | <b>*le</b>             |           |           |           |
| H | 2.714722  | -0.230434 | 2.920711  | SCF done: -2150.958284 |           |           |           |
| C | 6.208649  | 0.730870  | 1.485135  | C                      | -1.754192 | 3.149984  | -1.243799 |
| H | 7.181917  | 1.005423  | 1.082355  | C                      | -2.000489 | 3.207723  | -2.656200 |
| C | 4.839333  | -0.217276 | 3.249219  | C                      | -1.974390 | 1.993615  | -3.401110 |
| H | 4.772124  | -0.683182 | 4.229592  | C                      | -1.697303 | 0.796669  | -2.790701 |
| C | 6.110336  | 0.132815  | 2.725176  | C                      | -1.410806 | 0.738625  | -1.392461 |
| H | 7.007160  | -0.068393 | 3.306263  | C                      | -1.469308 | 1.896083  | -0.638222 |
| H | 1.721485  | 1.717308  | -2.642599 | C                      | -1.803485 | 4.357094  | -0.491437 |
| C | 1.111317  | 3.401178  | -1.498674 | C                      | -2.077498 | 5.560144  | -1.102283 |
| C | 1.241053  | 4.128601  | -0.307417 | C                      | -2.317658 | 5.615176  | -2.498527 |
| C | 0.614132  | 4.061441  | -2.631728 | C                      | -2.281036 | 4.464779  | -3.255619 |
| C | 0.877420  | 5.477657  | -0.249178 | C                      | -1.118807 | -0.570068 | -0.766301 |
| H | 1.639825  | 3.640086  | 0.577803  | Ni                     | 1.289001  | -0.395607 | -0.347271 |
| C | 0.250541  | 5.410006  | -2.580765 | O                      | -2.246875 | -2.257207 | 0.934031  |
| H | 0.507307  | 3.507422  | -3.562680 | C                      | -2.883134 | -1.866813 | -0.096131 |
| C | 0.380725  | 6.124326  | -1.385395 | O                      | -2.381684 | -1.208971 | -1.140785 |
| H | 0.992472  | 6.027268  | 0.682668  | N                      | -4.224463 | -2.132423 | -0.212220 |
| H | -0.128692 | 5.903457  | -3.472967 | C                      | -5.051239 | -1.716608 | -1.362665 |
| H | 0.105246  | 7.175425  | -1.341780 | C                      | -6.486072 | -2.045109 | -0.879115 |
| N | -2.539181 | -2.304448 | -0.157360 | C                      | -6.275504 | -3.271250 | 0.052984  |
| N | -0.497637 | -3.034528 | -0.442896 | C                      | -4.953131 | -2.936145 | 0.787589  |
| C | -1.251312 | -1.925102 | -0.308378 | C                      | -0.124336 | -1.482508 | -1.326425 |
| C | 0.925415  | -3.067605 | -0.654971 | C                      | 0.868541  | -1.016123 | -2.258953 |
| C | 1.419849  | -2.965375 | -1.967992 | C                      | 1.876845  | -1.914163 | -2.703939 |
| C | 1.786022  | -3.258464 | 0.443764  | C                      | 1.910879  | -3.220793 | -2.253791 |
| C | 2.803796  | -3.049920 | -2.163693 | C                      | 0.926055  | -3.684918 | -1.345980 |
| C | 3.160303  | -3.336110 | 0.194647  | C                      | -0.059415 | -2.840358 | -0.879261 |
| C | 3.690252  | -3.230586 | -1.097274 | H                      | -2.200280 | 2.029337  | -4.461934 |
| H | 3.196254  | -2.965500 | -3.175352 | H                      | -1.726743 | -0.132428 | -3.344365 |
| H | 3.836843  | -3.465659 | 1.037105  | H                      | -1.283519 | 1.858914  | 0.428650  |
| C | -3.687104 | -1.444935 | -0.091125 | H                      | -1.623289 | 4.307916  | 0.576817  |
| C | -4.182536 | -0.854355 | -1.268379 | H                      | -2.112661 | 6.473047  | -0.518695 |
| C | -4.340399 | -1.271332 | 1.146113  | H                      | -2.532596 | 6.569092  | -2.966300 |
| C | -5.349096 | -0.081350 | -1.183764 | H                      | -2.468403 | 4.501901  | -4.323792 |
| C | -5.501624 | -0.491956 | 1.177232  | H                      | -1.340123 | -0.685693 | 0.287716  |
| C | -6.025416 | 0.109165  | 0.024810  | H                      | -4.793573 | -2.294036 | -2.260016 |
| H | -5.737457 | 0.379529  | -2.089971 | H                      | -4.897722 | -0.657188 | -1.579889 |
| H | -6.009610 | -0.348724 | 2.129707  | H                      | -7.167138 | -2.254171 | -1.708037 |
| C | -3.480478 | -1.018997 | -2.596308 | H                      | -6.880256 | -1.205207 | -0.296508 |
| H | -4.113784 | -0.661107 | -3.414199 | H                      | -6.141251 | -4.173512 | -0.553720 |
| H | -2.543903 | -0.448237 | -2.621772 | H                      | -7.108155 | -3.427223 | 0.743735  |
| H | -3.224564 | -2.065146 | -2.800655 | H                      | -5.143711 | -2.350860 | 1.697778  |
| C | -7.287495 | 0.939274  | 0.094807  | H                      | -4.371354 | -3.818959 | 1.064497  |
| H | -7.161084 | 1.801600  | 0.761881  | H                      | 0.751463  | -0.055271 | -2.752948 |
| H | -7.571353 | 1.319615  | -0.891912 | H                      | 2.613592  | -1.563697 | -3.419100 |
| H | -8.129521 | 0.352395  | 0.483163  | H                      | 2.682919  | -3.897368 | -2.603250 |
| C | -3.805946 | -1.892339 | 2.416453  | H                      | 0.946665  | -4.719412 | -1.019798 |
| H | -3.957503 | -2.980217 | 2.433902  | H                      | -0.835698 | -3.171929 | -0.197530 |
| H | -2.733661 | -1.707343 | 2.537383  | N                      | 3.389518  | 0.125307  | 1.514632  |
| H | -4.324751 | -1.483694 | 3.289636  | N                      | 1.465040  | 0.553369  | 2.480810  |
| C | 0.500004  | -2.739438 | -3.146137 | C                      | 2.039767  | 0.180541  | 1.299177  |
| H | 0.084171  | -1.723956 | -3.135510 | C                      | 0.052248  | 0.700207  | 2.703581  |
| H | 1.043432  | -2.864319 | -4.088122 | C                      | -0.475308 | 1.998876  | 2.847949  |
| H | -0.347025 | -3.436004 | -3.152546 | C                      | -0.789319 | -0.424128 | -2.759594 |
| C | 5.183895  | -3.279037 | -1.322901 | C                      | -1.850747 | 2.154789  | 3.040779  |
| H | 5.424817  | -3.468118 | -2.374609 | C                      | -2.171492 | -0.225788 | 2.895168  |
| H | 5.650505  | -2.326281 | -1.040388 | C                      | -2.713934 | 1.051767  | 3.049939  |
| H | 5.655631  | -4.063149 | -0.718988 | H                      | -2.259058 | 3.154965  | 3.150063  |
| C | 1.256537  | -3.348880 | 1.855912  | H                      | -2.818729 | -1.089751 | 2.802026  |
| H | 0.640643  | -2.477192 | 2.104629  | C                      | 4.364619  | -0.146882 | 0.493722  |

|   |           |           |           |   |           |           |           |
|---|-----------|-----------|-----------|---|-----------|-----------|-----------|
| C | 4.809413  | 0.893933  | -0.342814 | H | -3.184012 | 5.705752  | -4.159738 |
| C | 4.873057  | -1.447781 | 0.353549  | H | -2.608563 | 3.519975  | -5.168125 |
| C | 5.783280  | 0.616292  | -1.304848 | H | -1.299921 | -0.647897 | 0.325131  |
| C | 5.851789  | -1.689603 | -0.616751 | H | -4.905444 | -3.514791 | -1.774960 |
| C | 6.320469  | -0.669400 | -1.449248 | H | -5.416615 | -1.824980 | -1.694104 |
| H | 6.125545  | 1.415866  | -1.954668 | H | -7.289670 | -3.834023 | -1.392117 |
| H | 6.245438  | -2.694622 | -0.729257 | H | -7.396244 | -2.360045 | -0.414545 |
| C | 4.204752  | 2.280140  | -0.227103 | H | -6.088349 | -5.011611 | 0.400008  |
| H | 4.661942  | 2.960616  | -0.950843 | H | -7.305452 | -4.107108 | 1.316695  |
| H | 3.126526  | 2.233033  | -0.420520 | H | -5.690479 | -2.404150 | 1.949476  |
| H | 4.347702  | 2.697043  | 0.776644  | H | -4.600549 | -3.792107 | 1.858498  |
| C | 7.390393  | -0.940015 | -2.493007 | H | 0.957842  | -0.684437 | -2.687877 |
| H | 7.045920  | -0.642651 | -3.490331 | H | 2.727114  | -2.381289 | -3.004790 |
| H | 8.302817  | -0.373566 | -2.269547 | H | 2.663434  | -4.511275 | -1.736668 |
| H | 7.647750  | -2.002976 | -2.522424 | H | 0.882660  | -4.893353 | -0.030593 |
| C | 4.318790  | -2.580326 | 1.195139  | H | -0.824861 | -3.137139 | 0.414439  |
| H | 4.374703  | -2.354017 | 2.265311  | N | 3.398711  | 0.502397  | 1.380378  |
| H | 3.265127  | -2.744469 | 0.939973  | N | 1.529210  | 1.202252  | 2.260420  |
| H | 4.871691  | -3.505063 | 1.007235  | C | 2.052373  | 0.547640  | 1.199215  |
| C | 0.428231  | 3.214527  | 2.750256  | C | 0.139779  | 1.455584  | 2.524585  |
| H | 1.071085  | 3.146216  | 1.866758  | C | -0.338097 | 2.769443  | 2.332128  |
| H | -0.167544 | 4.129336  | 2.680415  | C | -0.695922 | 0.441812  | 3.028752  |
| H | 1.074968  | 3.306068  | 3.632103  | C | -1.669987 | 3.047960  | 2.653736  |
| C | -4.211068 | 1.237748  | 3.221553  | C | -2.032944 | 0.765293  | 3.304370  |
| H | -4.486375 | 1.188115  | 4.283247  | C | -2.537661 | 2.056085  | 3.132344  |
| H | -4.535111 | 2.208326  | 2.832336  | H | -2.043903 | 4.061003  | 2.513851  |
| H | -4.759757 | 0.451658  | 2.693193  | H | -2.693675 | -0.028802 | 3.644459  |
| C | -0.264067 | -1.844892 | 2.675877  | C | 4.338275  | -0.010994 | 0.423661  |
| H | 0.631257  | -1.904576 | 2.054008  | C | 4.745666  | 0.795993  | -0.658978 |
| H | -0.024287 | -2.218331 | 3.680869  | C | 4.871734  | -1.298699 | 0.614465  |
| H | -1.036978 | -2.472700 | 2.227910  | C | 5.696461  | 0.282426  | -1.547218 |
| C | 3.803594  | 0.544498  | 2.897063  | C | 5.824928  | -1.766555 | -0.299345 |
| H | 4.305059  | 1.517148  | 2.858730  | C | 6.253128  | -0.992949 | -1.383099 |
| H | 4.477049  | -0.195198 | 3.334197  | H | 6.012382  | 0.896793  | -2.388788 |
| C | 2.438909  | 0.615514  | 3.626201  | H | 6.236556  | -2.764565 | -0.161477 |
| H | 2.277936  | -0.242506 | 4.286741  | C | 4.166999  | 2.175715  | -0.873079 |
| H | 2.309907  | 1.539982  | 4.190538  | H | 4.585532  | 2.634849  | -1.774203 |

**Ni<sup>TS<sub>5e</sub></sup>**

SCF done: -2150.940625

|    |           |           |           |                        |           |           |           |
|----|-----------|-----------|-----------|------------------------|-----------|-----------|-----------|
| C  | -2.091822 | 2.738293  | -1.856562 | H                      | 4.381680  | 2.844939  | -0.030324 |
| C  | -2.158298 | 2.562576  | -3.278220 | C                      | 7.301618  | -1.505830 | -2.344552 |
| C  | -1.841982 | 1.282957  | -3.816893 | H                      | 7.003206  | -1.344182 | -3.387378 |
| C  | -1.454224 | 0.245399  | -3.004102 | H                      | 8.259299  | -0.988428 | -2.198924 |
| C  | -1.347158 | 0.418409  | -1.588810 | H                      | 7.481073  | -2.577299 | -2.207131 |
| C  | -1.692623 | 1.646836  | -1.043039 | C                      | 4.408987  | -2.176701 | 1.753550  |
| C  | -2.435540 | 4.005817  | -1.306248 | H                      | 4.594491  | -1.716249 | 2.732009  |
| C  | -2.819540 | 5.050741  | -2.120372 | H                      | 3.332432  | -2.372014 | 1.687763  |
| C  | -2.879119 | 4.876205  | -3.526708 | H                      | 4.930149  | -3.139061 | 1.736684  |
| C  | -2.557137 | 3.657770  | -4.090002 | C                      | 0.550654  | 3.854861  | 1.767718  |
| C  | -0.966106 | -0.690998 | -0.704603 | H                      | 0.987402  | 3.554657  | 0.808426  |
| Ni | 1.274168  | -0.440132 | -0.262586 | H                      | -0.019525 | 4.774996  | 1.605693  |
| O  | -2.745103 | -2.071358 | 1.286066  | H                      | 1.384082  | 4.102205  | 2.438191  |
| C  | -3.333605 | -2.115861 | 0.171052  | C                      | -3.989948 | 2.362516  | 3.419788  |
| O  | -2.834004 | -1.756040 | -0.966901 | H                      | -4.156924 | 3.438021  | 3.545481  |
| N  | -4.632505 | -2.591523 | 0.118178  | H                      | -4.631633 | 2.019913  | 2.597243  |
| C  | -5.381438 | -2.761541 | -1.127753 | H                      | -4.333013 | 1.855799  | 4.328980  |
| C  | -6.764981 | -3.228875 | -0.644334 | C                      | -0.229512 | -0.972357 | 3.285166  |
| C  | -6.443372 | -4.002509 | 0.648323  | H                      | 0.791132  | -1.146596 | 2.937933  |
| C  | -5.301408 | -3.184790 | 1.276581  | H                      | -0.270224 | -1.199507 | 4.359193  |
| C  | -0.047514 | -1.758264 | -1.055545 | H                      | -0.895885 | -1.675181 | 2.772121  |
| C  | 0.990439  | -1.540314 | -2.018467 | C                      | 3.856288  | 1.241254  | 2.576929  |
| C  | 1.960424  | -2.550086 | -2.252946 | H                      | 4.355441  | 2.173560  | 2.280205  |
| C  | 1.922115  | -3.738936 | -1.546824 | H                      | 4.565798  | 0.644776  | 3.158050  |
| C  | 0.911269  | -3.954140 | -0.577782 | C                      | 2.533291  | 1.489541  | 3.311724  |
| C  | -0.038780 | -2.986359 | -0.319978 | H                      | 2.385459  | 0.801345  | 4.154847  |
| H  | -1.933781 | 1.128820  | -4.890133 | H                      | 2.430350  | 2.512423  | 3.683590  |
| H  | -1.273713 | -0.736484 | -3.428769 |                        |           |           |           |
| H  | -1.653842 | 1.783669  | 0.034074  | <b>N<sub>2e</sub></b>  |           |           |           |
| H  | -2.393343 | 4.133186  | -0.227293 | SCF done: -2150.959332 |           |           |           |
| H  | -3.081239 | 6.012686  | -1.686524 | C                      | 1.236083  | 1.142768  | 1.963342  |
|    |           |           |           | C                      | 0.882475  | 0.377389  | 3.118796  |
|    |           |           |           | C                      | 0.563858  | -1.015420 | 2.956239  |











|   |           |           |           |   |           |           |           |
|---|-----------|-----------|-----------|---|-----------|-----------|-----------|
| H | -0.188646 | 0.572262  | -3.176061 | H | -7.138908 | -1.428088 | 0.713841  |
| H | -1.326370 | 1.499596  | -4.177546 | H | -4.242041 | 0.422341  | 3.053304  |
| C | 5.282886  | 1.517188  | 0.864196  | H | -4.520176 | -1.315049 | 3.342076  |
| H | 4.330329  | 2.036417  | 1.002366  | H | -5.881900 | -0.254840 | 2.907977  |
| H | 5.821423  | 1.529160  | 1.817835  | H | -4.431659 | 1.168452  | -2.229443 |
| H | 5.881335  | 2.107852  | 0.156250  | H | -5.912778 | 0.183368  | -2.297752 |
| C | 6.802043  | -3.297436 | 0.845203  | H | -4.387471 | -0.464089 | -2.952064 |
| H | 6.365480  | -3.815340 | 1.710094  | H | -6.331906 | 2.723276  | -0.029149 |
| H | 6.997222  | -4.055056 | 0.078099  | C | -8.857629 | -0.151726 | 0.547046  |
| H | 7.763909  | -2.881203 | 1.164966  | H | -9.580808 | -0.946313 | 0.718103  |
| C | 2.973506  | -1.916768 | -2.134138 | H | -2.068610 | -0.498700 | 0.333097  |
| H | 2.715616  | -1.069630 | -2.777988 | O | -4.047433 | 1.439955  | 0.465680  |
| H | 3.365724  | -2.720075 | -2.767916 | H | -4.407654 | 2.088457  | 1.085575  |
| H | 2.039583  | -2.275177 | -1.679514 | N | 1.805226  | -3.062823 | -0.977114 |
| C | 2.490935  | 2.723211  | -2.132564 | N | 3.836836  | -2.261422 | -0.891129 |
| H | 2.727846  | 3.677694  | -1.643784 | C | 2.532922  | -1.958570 | -0.690849 |
| H | 2.165342  | 2.936347  | -3.154070 | C | 4.957205  | -1.361940 | -0.898112 |
| C | 3.647089  | 1.721856  | -2.064363 | C | 5.120105  | -0.458710 | -1.968042 |
| H | 3.784176  | 1.168325  | -3.002628 | C | 5.937102  | -1.486988 | 0.107216  |
| H | 4.601087  | 2.183284  | -1.797053 | C | 6.272044  | 0.338322  | -1.988681 |

#5

SCF done: -2856.475454

|    |           |           |           |   |           |           |           |
|----|-----------|-----------|-----------|---|-----------|-----------|-----------|
| C  | -0.372032 | -1.007538 | 4.005646  | H | 7.820698  | -0.746429 | 0.823422  |
| C  | 0.238637  | -1.926006 | 4.867339  | C | 0.374039  | -3.211273 | -0.927051 |
| C  | 1.581116  | -2.256252 | 4.665151  | C | -0.374544 | -2.973093 | -2.100747 |
| C  | 2.297538  | -1.678640 | 3.612960  | C | -0.238473 | -3.714833 | 0.236566  |
| C  | 1.703627  | -0.758135 | 2.727489  | C | -1.757030 | -3.189463 | -2.059918 |
| C  | 0.349058  | -0.436302 | 2.954510  | C | -1.628059 | -3.912001 | 0.225325  |
| Ni | 1.682378  | -0.318581 | -0.178973 | C | -2.410433 | -3.652948 | -0.907298 |
| O  | 0.872561  | 0.327980  | -1.963696 | H | -2.342815 | -2.998934 | -2.956864 |
| N  | -0.527408 | 2.148673  | -1.872863 | H | -2.108532 | -4.292085 | 1.124919  |
| C  | 0.213700  | 1.196414  | -1.278996 | C | 0.286061  | -2.513250 | -3.378992 |
| O  | 0.267981  | 1.113648  | 0.012162  | H | -0.445251 | -2.471808 | -4.192540 |
| C  | -1.234424 | 3.212602  | -1.129798 | H | 0.722883  | -1.517578 | -3.257799 |
| C  | -1.543575 | 4.245291  | -2.225468 | H | 1.086348  | -3.197166 | -3.690115 |
| C  | -1.700021 | 3.387940  | -3.495262 | C | -3.908641 | -3.835944 | -0.887014 |
| C  | -0.621906 | 2.303807  | -3.332223 | H | -4.218238 | -4.496699 | -0.070486 |
| C  | 2.517541  | -0.161641 | 1.616877  | H | -4.406788 | -2.866663 | -0.748099 |
| C  | 2.806468  | 1.317023  | 1.665172  | H | -4.266617 | -4.263711 | -1.831017 |
| C  | 3.872736  | 1.827474  | 0.930020  | C | 0.561823  | -4.091906 | 1.459961  |
| C  | 4.197118  | 3.208594  | 0.912543  | H | 0.958636  | -5.113065 | 1.367481  |
| C  | 3.413676  | 4.121396  | 1.691555  | H | 1.403809  | -3.417713 | 1.625187  |
| C  | 2.340502  | 3.590017  | 2.455980  | H | -0.061831 | -4.067760 | 2.358136  |
| C  | 2.045943  | 2.245974  | 2.441261  | C | 4.101864  | -0.342738 | -3.078226 |
| C  | -9.315242 | 1.153764  | 0.344606  | H | 3.168068  | 0.115489  | -2.733679 |
| C  | -8.398476 | 2.186726  | 0.142443  | H | 4.498382  | 0.268301  | -3.895310 |
| C  | -7.026870 | 1.902088  | 0.143905  | H | 3.839264  | -1.323920 | -3.492612 |
| C  | -6.524560 | 0.604135  | 0.348719  | C | 8.478871  | 1.142616  | -1.031082 |
| C  | -7.483817 | -0.409155 | 0.546628  | H | 8.390712  | 1.964834  | -0.308419 |
| B  | -4.934910 | 0.230983  | 0.330078  | H | 9.386345  | 0.583426  | -0.775155 |
| O  | -4.569978 | -0.779388 | 1.371446  | H | 8.622736  | 1.587131  | -2.021564 |
| C  | -4.817305 | -0.460963 | 2.718145  | C | 5.816444  | -2.496998 | 1.226105  |
| O  | -4.490860 | -0.450360 | -0.912463 | H | 4.773874  | -2.713418 | 1.473899  |
| C  | -4.823768 | 0.141519  | -2.145509 | H | 6.295870  | -3.448635 | 0.955938  |
| H  | 2.076297  | -2.958529 | 5.332137  | H | 6.315071  | -2.133779 | 2.130726  |
| H  | 3.347067  | -1.934355 | 3.480963  | C | 2.635055  | -4.236383 | -1.330334 |
| H  | -0.128054 | 0.292202  | 2.306008  | H | 2.285896  | -4.683518 | -2.265944 |
| H  | -0.594761 | 3.600614  | -0.332429 | H | 2.563657  | -4.994386 | -0.541317 |
| H  | -2.151578 | 2.814054  | -0.677695 | C | 4.037343  | -3.625314 | -1.437530 |
| H  | -0.700894 | 4.939222  | -2.339421 | H | 4.786667  | -4.167511 | -0.854139 |
| H  | -2.436594 | 4.834499  | -1.995338 | H | 4.394275  | -3.556713 | -2.472750 |
| H  | -1.574438 | 3.959321  | -4.420564 | C | 5.280792  | 3.725216  | 0.145176  |
| H  | -2.694669 | 2.925972  | -3.515741 | H | 5.872088  | 3.034229  | -0.451006 |
| H  | -0.886325 | 1.353304  | -3.805227 | C | 3.741737  | 5.504166  | 1.677779  |
| H  | 0.345309  | 2.625169  | -3.742815 | H | 3.144002  | 6.190408  | 2.274636  |
| H  | 3.468405  | -0.693018 | 1.548824  | C | 5.573424  | 5.072973  | 0.148322  |
| H  | 4.486870  | 1.151884  | 0.340875  | H | 6.402151  | 5.451968  | -0.445188 |
| H  | 1.745515  | 4.266507  | 3.066892  | C | 4.797353  | 5.973663  | 0.923293  |
| H  | 1.225151  | 1.888418  | 3.050823  | H | 5.038239  | 7.033771  | 0.919958  |
| H  | -8.762151 | 3.201972  | -0.001683 | H | -0.321664 | -2.367469 | 5.687458  |

|   |            |           |           |   |           |          |           |
|---|------------|-----------|-----------|---|-----------|----------|-----------|
| H | -1.412414  | -0.728501 | 4.159739  | C | -3.342557 | 4.376184 | -1.383378 |
| O | -10.677419 | 1.425567  | 0.391423  | C | -2.390388 | 5.354000 | -1.075399 |
| C | -11.327556 | 1.400857  | -0.875673 | H | -0.280669 | 5.766314 | -0.975261 |
| H | -12.380440 | 1.631006  | -0.691023 | H | -4.400752 | 4.615446 | -1.292728 |
| H | -10.903375 | 2.152604  | -1.556468 | C | 0.854451  | 3.445195 | -1.742988 |
| H | -11.246482 | 0.409654  | -1.344534 | H | 1.441907  | 4.366312 | -1.681227 |

**N6**

SCF done: -2086.005749

|    |           |           |           |
|----|-----------|-----------|-----------|
| C  | -4.169752 | -2.464835 | 0.653020  |
| C  | -3.457214 | -3.469060 | 1.385849  |
| C  | -2.190974 | -3.128508 | 1.939021  |
| C  | -1.651552 | -1.871380 | 1.785634  |
| C  | -2.352463 | -0.855618 | 1.061675  |
| C  | -3.585478 | -1.177676 | 0.509826  |
| C  | -5.437433 | -2.792194 | 0.095013  |
| C  | -5.974635 | -4.053330 | 0.250523  |
| C  | -5.266853 | -5.047737 | 0.973248  |
| C  | -4.036351 | -4.759314 | 1.527728  |
| Ni | -0.020301 | 0.392930  | 0.074111  |
| O  | 1.003058  | 0.356167  | 1.661132  |
| C  | -1.821945 | 0.536643  | 0.899164  |
| C  | 6.049213  | 0.481974  | 0.268796  |
| C  | 5.862026  | -0.763848 | 0.883093  |
| C  | 4.639580  | -1.067942 | 1.481851  |
| C  | 3.550776  | -0.169343 | 1.496375  |
| C  | 3.783881  | 1.070888  | 0.881092  |
| B  | 2.169377  | -0.491427 | 2.311528  |
| O  | 2.147279  | 0.067692  | 3.655323  |
| C  | 3.009262  | -0.461790 | 4.631850  |
| O  | 1.801968  | -1.897287 | 2.363393  |
| C  | 1.746385  | -2.676639 | 1.198401  |
| H  | -1.636757 | -3.886247 | 2.489077  |
| H  | -0.670056 | -1.657978 | 2.200724  |
| H  | -4.143799 | -0.418307 | -0.035467 |
| H  | -5.981413 | -2.027462 | -0.456229 |
| H  | -6.945388 | -4.288962 | -0.178550 |
| H  | -5.700182 | -6.037636 | 1.091877  |
| H  | -3.492631 | -5.518890 | 2.085646  |
| H  | 6.687026  | -1.472114 | 0.888537  |
| H  | 2.992076  | 1.817954  | 0.891135  |
| H  | 2.822652  | 0.066001  | 5.575696  |
| H  | 4.069138  | -0.319897 | 4.362113  |
| H  | 2.833451  | -1.536741 | 4.789424  |
| H  | 1.472007  | -3.702153 | 1.480525  |
| H  | 2.705390  | -2.710184 | 0.662166  |
| H  | 0.984041  | -2.312236 | 0.488969  |
| H  | 4.531015  | -2.037072 | 1.965673  |
| C  | 5.002668  | 1.410644  | 0.271854  |
| H  | 5.121513  | 2.391663  | -0.178360 |
| O  | 7.285352  | 0.696225  | -0.299140 |
| C  | 7.551121  | 1.966897  | -0.865488 |
| H  | 8.580640  | 1.924778  | -1.228292 |
| H  | 6.878719  | 2.183504  | -1.708036 |
| H  | 7.460782  | 2.767900  | -0.118499 |
| H  | 0.654950  | 0.884030  | 2.398696  |
| N  | -1.218140 | 1.499154  | -2.420995 |
| N  | -0.189820 | -0.410856 | -2.689517 |
| C  | -0.556349 | 0.508550  | -1.772971 |
| C  | 0.561600  | -1.621773 | -2.475460 |
| C  | 1.967506  | -1.576269 | -2.533734 |
| C  | -0.130443 | -2.841711 | -2.337702 |
| C  | 2.670967  | -2.782956 | -2.428722 |
| C  | 0.619665  | -4.016826 | -2.231872 |
| C  | 2.019882  | -4.009940 | -2.271885 |
| H  | 3.758228  | -2.756120 | -2.461941 |
| H  | 0.094299  | -4.962487 | -2.112798 |
| C  | -1.607045 | 2.781198  | -1.903395 |
| C  | -0.620263 | 3.746963  | -1.616052 |
| C  | -2.978068 | 3.091630  | -1.804181 |
| C  | -1.037395 | 5.017657  | -1.201124 |

|   |           |           |           |
|---|-----------|-----------|-----------|
| C | -3.342557 | 4.376184  | -1.383378 |
| C | -2.390388 | 5.354000  | -1.075399 |
| H | -0.280669 | 5.766314  | -0.975261 |
| H | -4.400752 | 4.615446  | -1.292728 |
| C | 0.854451  | 3.445195  | -1.742988 |
| H | 1.441907  | 4.366312  | -1.681227 |
| H | 1.196878  | 2.776819  | -0.943550 |
| H | 1.094035  | 2.955511  | -2.694018 |
| C | -2.813916 | 6.725779  | -0.602416 |
| H | -3.095668 | 6.706631  | 0.458845  |
| H | -2.005299 | 7.455526  | -0.715293 |
| H | -3.682778 | 7.091666  | -1.161398 |
| C | -4.055550 | 2.090510  | -2.156215 |
| H | -4.359921 | 2.185867  | -3.208052 |
| H | -3.724254 | 1.059770  | -2.001901 |
| H | -4.951132 | 2.256788  | -1.548554 |
| C | 2.731429  | -0.280755 | -2.684467 |
| H | 2.919596  | 0.186067  | -1.709010 |
| H | 3.709490  | -0.464574 | -3.140267 |
| H | 2.200149  | 0.449211  | -3.304120 |
| C | 2.805937  | -5.291411 | -2.118808 |
| H | 3.771140  | -5.234284 | -2.633724 |
| H | 3.012664  | -5.496877 | -1.059800 |
| H | 2.255584  | -6.150885 | -2.517511 |
| C | -1.638974 | -2.896158 | -2.299094 |
| H | -2.046697 | -2.231802 | -1.531514 |
| H | -2.085245 | -2.602730 | -3.258956 |
| H | -1.982564 | -3.910860 | -2.078273 |
| C | -1.278342 | 1.296058  | -3.889296 |
| H | -0.743080 | 2.108769  | -4.394246 |
| C | -2.316206 | 1.306636  | -4.235741 |
| H | -0.602229 | -0.070216 | -4.069813 |
| H | -1.283903 | -0.834688 | -4.456695 |
| H | 0.274911  | -0.035448 | -4.724846 |
| H | -2.390667 | 1.064160  | 0.132757  |
| C | -1.733563 | 1.412359  | 2.116157  |
| C | -1.675283 | 2.811573  | 1.942355  |
| C | -1.736826 | 0.921181  | 3.436852  |
| C | -1.613838 | 3.678443  | 3.032255  |
| H | -1.678143 | 3.219107  | 0.936458  |
| C | -1.673295 | 1.789355  | 4.529206  |
| H | -1.788945 | -0.146161 | 3.618960  |
| C | -1.609005 | 3.171383  | 4.336221  |
| H | -1.567668 | 4.751857  | 2.863361  |
| H | -1.668244 | 1.378298  | 5.535388  |
| H | -1.554441 | 3.843852  | 5.188430  |

**N7S,**

SCF done: -2427.608433

|    |           |           |           |
|----|-----------|-----------|-----------|
| C  | -4.904308 | 1.483494  | -0.011901 |
| C  | -5.371796 | 0.567437  | 0.985753  |
| C  | -4.406710 | -0.044372 | 1.833296  |
| C  | -3.063573 | 0.229194  | 1.706481  |
| C  | -2.573150 | 1.151027  | 0.727351  |
| C  | -3.510995 | 1.750797  | -0.103812 |
| C  | -5.857319 | 2.103218  | -0.868680 |
| C  | -7.204455 | 1.830517  | -0.746794 |
| C  | -7.664599 | 0.921811  | 0.240328  |
| C  | -6.764969 | 0.305828  | 1.086783  |
| Ni | 0.196372  | -0.094890 | 0.485382  |
| O  | -0.041463 | -0.395669 | 2.410795  |
| C  | -1.116304 | 1.492626  | 0.588009  |
| C  | 4.840831  | -1.536817 | 0.397355  |
| C  | 3.917755  | -2.570594 | 0.179674  |
| C  | 2.567383  | -2.363272 | 0.453401  |
| C  | 2.054463  | -1.140547 | 0.947765  |
| C  | 3.024763  | -0.127198 | 1.137241  |
| B  | 1.013803  | -1.367285 | 2.671289  |
| O  | 1.872733  | -0.906053 | 3.680362  |
| C  | 2.836837  | -1.773708 | 4.246929  |
| O  | 0.639420  | -2.715385 | 2.745503  |

|   |           |           |           |                        |           |           |           |
|---|-----------|-----------|-----------|------------------------|-----------|-----------|-----------|
| C | -0.509960 | -3.197449 | 2.084803  | C                      | -0.718137 | -0.825315 | -3.597598 |
| H | -4.746302 | -0.749832 | 2.589998  | H                      | -1.793258 | -0.684905 | -3.765397 |
| H | -2.350141 | -0.276311 | 2.347176  | H                      | -0.373371 | -1.637070 | -4.244173 |
| H | -3.180833 | 2.468452  | -0.852317 | H                      | -0.972163 | 2.017192  | -0.353991 |
| H | -5.505577 | 2.803954  | -1.623712 | C                      | -0.525739 | 2.346610  | 1.677171  |
| H | -7.919941 | 2.314706  | -1.407060 | C                      | 0.667715  | 3.064878  | 1.428512  |
| H | -8.728197 | 0.715228  | 0.329148  | C                      | -1.089832 | 2.483578  | 2.964679  |
| H | -7.113705 | -0.389703 | 1.847829  | C                      | 1.261156  | 3.863733  | 2.403460  |
| H | 4.285066  | -3.529857 | -0.176965 | H                      | 1.133296  | 2.989276  | 0.450710  |
| H | 2.718325  | 0.829865  | 1.554711  | C                      | -0.489676 | 3.281664  | 3.946820  |
| H | 3.296676  | -1.251032 | 5.092462  | C                      | -2.024972 | 1.984870  | 3.198870  |
| H | 3.619468  | -2.022532 | 3.516386  | C                      | 0.690125  | 3.975948  | 3.677508  |
| H | 2.377382  | -2.704589 | 4.601479  | H                      | 2.177908  | 4.400583  | 2.168629  |
| H | -0.551995 | -4.281707 | 2.234661  | H                      | -0.958343 | 3.361574  | 4.925167  |
| H | -0.476784 | -2.990844 | 1.007718  | H                      | 1.155590  | 4.594330  | 4.440572  |
| H | -1.426433 | -2.748712 | 2.491950  |                        |           |           |           |
| H | 1.892491  | -3.205578 | 0.324931  | <b>ng</b>              |           |           |           |
| C | 4.389882  | -0.302333 | 0.884932  | SCF done: -2427.594345 |           |           |           |
| H | 5.080564  | 0.512002  | 1.081070  | C                      | 1.525959  | 5.160642  | -1.741130 |
| O | 6.148797  | -1.832622 | 0.119117  | C                      | 2.250954  | 4.765856  | -2.869104 |
| C | 7.140900  | -0.855231 | 0.398057  | C                      | 2.123771  | 3.448932  | -3.324961 |
| H | 8.094512  | -1.314757 | 0.130524  | C                      | 1.291992  | 2.543552  | -2.662550 |
| H | 6.993211  | 0.051751  | -0.203569 | C                      | 0.541529  | 2.918734  | -1.527666 |
| H | 7.149674  | -0.587086 | 1.462689  | C                      | 0.683964  | 4.253546  | -1.091720 |
| H | 0.065482  | 0.400255  | 2.962512  | Ni                     | 0.331885  | 0.107053  | -0.139249 |
| N | 0.376088  | 0.843751  | -2.370388 | O                      | 0.228092  | -0.565148 | -2.206567 |
| N | -0.478101 | -1.156837 | -2.175569 | C                      | -0.375450 | 1.985764  | -0.796389 |
| C | 0.089943  | -0.142135 | -1.469187 | C                      | -0.213249 | -4.616657 | 0.508115  |
| C | -0.858674 | -2.476466 | -1.741652 | C                      | 1.094120  | -4.137536 | 0.363210  |
| C | 0.068808  | -3.527757 | -1.910122 | C                      | 1.332164  | -2.762503 | 0.277564  |
| C | -2.181305 | -2.740609 | -1.339959 | C                      | 0.301090  | -1.803770 | 0.333088  |
| C | -0.316847 | -4.821896 | -1.545066 | C                      | -0.998502 | -2.326382 | 0.479359  |
| C | -2.518580 | -4.054341 | -0.985473 | B                      | 0.646425  | -1.773111 | -2.778504 |
| C | -1.599586 | -5.104568 | -1.059289 | O                      | -0.322021 | -2.599748 | -3.258997 |
| H | 0.401858  | -5.632156 | -1.654801 | C                      | 0.003047  | -3.849802 | -3.864764 |
| H | -3.535090 | -4.257221 | -0.652988 | O                      | 1.963959  | -2.066432 | -2.939861 |
| C | 1.203343  | 2.007971  | -2.192153 | C                      | 3.014586  | -1.173817 | -2.574855 |
| C | 2.607073  | 1.847742  | -2.141086 | H                      | 2.681647  | 3.121629  | -4.200414 |
| C | 0.630143  | 3.291746  | -2.247200 | H                      | 1.227017  | 1.520242  | -3.016581 |
| C | 3.403836  | 2.989074  | -2.020175 | H                      | 0.110930  | 4.588677  | -0.229611 |
| C | 1.474704  | 4.406908  | -2.135954 | H                      | 1.911467  | -4.853420 | 0.311652  |
| C | 2.857398  | 4.280314  | -1.997692 | H                      | -1.853772 | -1.654332 | 0.526111  |
| H | 4.484279  | 2.867558  | -1.966905 | H                      | -0.925609 | -4.262488 | -4.267028 |
| H | 1.029446  | 5.400227  | -2.159140 | H                      | 0.416560  | -4.538131 | -3.120051 |
| C | 3.250689  | 0.491176  | -2.297289 | H                      | 0.729101  | -3.719117 | -4.674953 |
| H | 4.333296  | 0.561215  | -2.163577 | H                      | 3.947762  | -1.613960 | -2.935959 |
| H | 2.873195  | -0.233036 | -1.573875 | H                      | 3.067795  | -1.052240 | -1.489957 |
| H | 3.070511  | 0.086694  | -3.302634 | H                      | 2.875641  | -0.190730 | -3.036263 |
| C | 3.744450  | 5.493631  | -1.837178 | H                      | 2.364888  | -2.445681 | 0.156620  |
| H | 4.025664  | 5.639807  | -0.785544 | C                      | -1.269987 | -3.701618 | 0.564683  |
| H | 4.673933  | 5.389312  | -2.409078 | H                      | -2.298706 | -4.034440 | 0.664314  |
| H | 3.240150  | 6.406479  | -2.171626 | O                      | -0.353860 | -5.984236 | 0.580048  |
| C | -0.848912 | 3.530576  | -2.455558 | C                      | -1.659402 | -6.516168 | 0.728335  |
| H | -1.016709 | 4.096899  | -3.381050 | H                      | -1.538342 | -7.601014 | 0.767049  |
| H | -1.416118 | 2.600238  | -2.519171 | H                      | -2.132167 | -6.169840 | 1.658146  |
| H | -1.269758 | 4.123035  | -1.634585 | H                      | -2.302179 | -6.251929 | -0.122841 |
| C | 1.419833  | -3.303483 | -2.549204 | H                      | -0.708575 | -0.394481 | -2.419019 |
| H | 1.908862  | -2.398229 | -2.186894 | N                      | 0.130005  | 1.294193  | 2.567713  |
| H | 2.087400  | -4.147600 | -2.351238 | N                      | 2.186783  | 0.923932  | 1.917610  |
| H | 1.323552  | -3.218214 | -3.641459 | C                      | 0.882318  | 0.768347  | 1.555135  |
| C | -1.975052 | -6.503421 | -0.627754 | C                      | 3.372086  | 0.397018  | 1.293813  |
| H | -1.486198 | -7.261157 | -1.250700 | C                      | 3.862588  | -0.850973 | 1.738833  |
| H | -1.668047 | -6.688805 | 0.410520  | C                      | 4.117764  | 1.186898  | 0.400251  |
| H | -3.057358 | -6.663328 | -0.682646 | C                      | 5.053460  | -1.334252 | 1.186889  |
| C | -3.252857 | -1.680147 | -1.362253 | C                      | 5.303805  | 0.655519  | -0.128618 |
| H | -2.861541 | -0.686541 | -1.146191 | C                      | 5.781845  | -0.605068 | 0.237374  |
| H | -3.734081 | -1.644795 | -2.350470 | H                      | 5.426845  | -2.302441 | 1.516217  |
| H | -4.036693 | -1.895117 | -0.631042 | H                      | 5.872951  | 1.258186  | -0.834312 |
| C | 0.077642  | 0.465637  | -3.770865 | C                      | -1.288035 | 1.185975  | 2.790798  |
| H | 1.013125  | 0.316828  | -4.324525 | C                      | -1.814089 | -0.017961 | 3.319476  |
| H | -0.488580 | 1.258287  | -4.268536 | C                      | -2.107178 | 2.320819  | 2.646562  |

|           |              |           |           |   |           |           |           |
|-----------|--------------|-----------|-----------|---|-----------|-----------|-----------|
| C         | -3.184357    | -0.086197 | 3.583654  | C | -0.368097 | 1.924286  | -1.431981 |
| C         | -3.475717    | 2.202516  | 2.937289  | O | 0.881065  | 5.249741  | -2.272357 |
| C         | -4.038560    | 1.009027  | 3.388338  | C | 1.853933  | 6.183013  | -1.839705 |
| H         | -3.592992    | -1.015895 | 3.976141  | C | -2.991050 | 2.026970  | 1.629192  |
| H         | -4.111817    | 3.076197  | 2.805506  | C | -4.338741 | 2.254332  | 1.246797  |
| C         | -0.927469    | -1.188222 | 3.675024  | C | -5.039986 | 1.234461  | 0.524338  |
| H         | -1.532529    | -2.057989 | 3.948096  | C | -4.335438 | 0.042649  | 0.203382  |
| H         | -0.279775    | -1.482360 | 2.847753  | C | -3.024610 | -0.139967 | 0.584021  |
| H         | -0.290794    | -0.949414 | 4.538209  | C | -5.025941 | 3.460959  | 1.562448  |
| C         | -5.516797    | 0.897396  | 3.684850  | C | -6.339465 | 3.648225  | 1.186042  |
| H         | -6.021749    | 1.862223  | 3.571613  | C | -7.031994 | 2.636208  | 0.472003  |
| H         | -6.006185    | 0.185007  | 3.008162  | C | -6.392603 | 1.456948  | 0.148705  |
| H         | -5.692679    | 0.541797  | 4.707885  | H | -0.505670 | 1.675594  | 2.093519  |
| C         | -1.582070    | 3.676006  | 2.227659  | H | 0.915964  | 0.954527  | 3.726828  |
| H         | -1.803357    | 4.423762  | 3.000310  | H | 1.872040  | -0.798164 | 5.172044  |
| H         | -0.504110    | 3.671556  | 2.056742  | H | 1.128189  | -3.173214 | 4.933913  |
| H         | -2.064396    | 4.014785  | 1.303128  | H | -0.572374 | -3.748951 | 3.213974  |
| C         | 3.168761     | -1.631201 | 2.830913  | H | -1.574839 | -2.004894 | 1.808360  |
| H         | 2.096839     | -1.726482 | 2.647926  | H | 2.146877  | 2.112909  | 0.832991  |
| H         | 3.586721     | -2.639411 | 2.910042  | H | 2.433558  | 4.296498  | -0.205321 |
| H         | 3.301176     | -1.145567 | 3.808188  | H | -1.194674 | 1.300323  | -1.762154 |
| C         | 7.048693     | -1.169298 | -0.364762 | H | 1.729877  | 7.063058  | -2.474869 |
| H         | 6.820931     | -1.921199 | -1.132409 | H | 2.873888  | 5.790210  | -1.960133 |
| H         | 7.650443     | -0.386462 | -0.838697 | H | 1.700687  | 6.468290  | -0.789291 |
| H         | 7.668442     | -1.661250 | 0.394196  | H | -2.474981 | 2.811679  | 2.179586  |
| C         | 3.726132     | 2.604457  | 0.068093  | H | -4.843463 | -0.730034 | -0.370723 |
| H         | 2.646900     | 2.751656  | 0.078920  | H | -2.514981 | -1.043769 | 0.267332  |
| H         | 4.168519     | 3.301969  | 0.794286  | H | -4.494520 | 4.237659  | 2.108581  |
| H         | 4.089919     | 2.895734  | -0.921118 | H | -6.850010 | 4.575365  | 1.435084  |
| C         | 0.940584     | 1.758582  | 3.715997  | H | -8.067252 | 2.794602  | 0.180164  |
| H         | 0.798565     | 1.086077  | 4.571268  | H | -6.919154 | 0.678551  | -0.400608 |
| H         | 0.630857     | 2.763250  | 4.019013  | C | -0.209140 | 3.171511  | -2.041515 |
| C         | 2.361188     | 1.711038  | 3.156364  | H | -0.876246 | 3.495729  | -2.836718 |
| H         | 2.749800     | 2.707675  | 2.910863  | N | 0.828921  | -2.293720 | -1.577591 |
| H         | 3.074153     | 1.221982  | 3.826387  | N | 2.671016  | -1.261043 | -1.044292 |
| H         | -0.669504    | 2.456173  | 0.140077  | C | 1.348432  | -1.338985 | -0.763762 |
| C         | -1.629460    | 1.564528  | -1.500917 | C | 3.658738  | -0.482505 | -0.350740 |
| C         | -2.696290    | 1.026014  | -0.776009 | C | 4.218159  | 0.636886  | -0.992019 |
| C         | -1.809042    | 1.658123  | -2.922344 | C | 4.118195  | -0.908674 | 0.912094  |
| C         | -3.896394    | 0.580871  | -1.383860 | C | 5.232424  | 1.341792  | -0.329489 |
| H         | -2.612350    | 0.942506  | 0.304133  | C | 5.126738  | -0.166619 | 1.535491  |
| C         | -2.964399    | 1.233031  | -3.544419 | C | 5.696876  | 0.962925  | 0.933256  |
| H         | -1.023003    | 2.099406  | -3.525700 | H | 5.661665  | 2.216191  | -0.814923 |
| C         | -4.043387    | 0.677503  | -2.807265 | H | 5.482948  | -0.486106 | -2.513578 |
| H         | -3.061550    | 1.331212  | -4.624352 | C | -0.538679 | -2.726740 | -1.629861 |
| H         | 2.899253     | 5.469968  | -3.384920 | C | -1.429334 | -2.146316 | -2.550389 |
| H         | 1.603954     | 6.181547  | -1.372480 | C | -0.936000 | -3.809117 | -0.815792 |
| C         | -5.246285    | 0.227741  | -3.415560 | C | -2.745947 | -2.628777 | -2.595222 |
| H         | -5.347860    | 0.305874  | -4.496409 | C | -2.258629 | -4.254297 | -0.896787 |
| C         | -4.972151    | 0.029978  | -0.627022 | C | -3.183922 | -3.671073 | -1.774223 |
| H         | -4.863150    | -0.044963 | 0.452771  | H | -3.444088 | -2.172104 | -3.294325 |
| C         | -6.127054    | -0.399420 | -1.245651 | C | -2.573249 | -5.083406 | -0.265053 |
| H         | -6.937723    | -0.818107 | -0.653700 | H | -0.994475 | -1.063872 | -3.510584 |
| C         | -6.268935    | -0.300537 | -2.654957 | H | -1.843550 | -0.435933 | -3.799037 |
| H         | -7.184828    | -0.642219 | -3.130522 | H | -0.226480 | -0.416215 | -3.082822 |
|           |              |           |           | H | -0.590088 | -1.501621 | -4.434361 |
|           |              |           |           | C | -4.613605 | -4.160460 | -1.822893 |
| <b>ng</b> |              |           |           | H | -4.660071 | -5.253705 | -1.898121 |
| SCF done: | -2096.557955 |           |           | H | -5.160614 | -3.876078 | -0.914246 |
| C         | -2.313071    | 0.850610  | 1.331780  | H | -5.151641 | -3.740079 | -2.678964 |
| Ni        | 0.301640     | -0.202675 | 0.471938  | C | 0.049356  | -4.503200 | 0.095843  |
| C         | -0.892171    | 0.712296  | 1.761084  | H | 0.839863  | -5.004421 | -0.478508 |
| C         | -0.402510    | -0.368713 | 2.630743  | H | 0.539139  | -3.802107 | 0.777357  |
| C         | 0.597500     | -0.078392 | 3.606879  | H | -0.453046 | -5.268812 | 0.695884  |
| C         | 1.133109     | -1.064151 | 4.419412  | C | 3.747431  | 1.088405  | -2.354657 |
| C         | 0.717248     | -2.402968 | 4.286401  | H | 2.655504  | 1.133411  | -2.403467 |
| C         | -0.230775    | -2.722140 | 3.321408  | H | 4.135128  | 2.085529  | -2.582803 |
| C         | -0.779639    | -1.728507 | 2.490829  | H | 4.094552  | 0.414419  | -3.150240 |
| C         | 0.480298     | 1.484711  | -0.397545 | C | 6.783808  | 1.745013  | 1.636147  |
| C         | 1.473365     | 2.381615  | 0.021403  | H | 6.411131  | 2.199765  | 2.563208  |
| C         | 1.646518     | 3.644347  | -0.571999 | H | 7.627746  | 1.099471  | 1.910358  |
| C         | 0.803767     | 4.040233  | -1.615542 |   |           |           |           |



|   |          |           |           |   |           |           |           |
|---|----------|-----------|-----------|---|-----------|-----------|-----------|
| H | 7.170003 | 2.550522  | 1.002686  | C | -0.635746 | -2.877918 | -1.297941 |
| C | 3.552739 | -2.137625 | 1.584714  | C | -1.391450 | -2.327293 | -2.349189 |
| H | 2.518072 | -1.983147 | 1.907519  | C | -1.210569 | -3.793295 | -0.392127 |
| H | 3.556297 | -3.006096 | 0.914759  | C | -2.741275 | -2.691052 | -2.461840 |
| H | 4.141910 | -2.396870 | 2.470080  | C | -2.561524 | -4.122764 | -0.542005 |
| C | 1.805561 | -2.854464 | -2.537342 | C | -3.345514 | -3.583373 | -1.570959 |
| H | 1.563042 | -2.526396 | -3.555855 | H | -3.332352 | -2.261336 | -3.268708 |
| H | 1.782868 | -3.948772 | -2.516820 | H | -3.012818 | -4.822068 | 0.160228  |
| C | 3.127878 | -2.267683 | -2.030222 | C | -0.773889 | -1.374765 | -3.346404 |
| H | 3.760164 | -3.014400 | -1.532216 | H | -1.549395 | -0.871505 | -3.932739 |
| H | 3.718384 | -1.797615 | -2.821315 | H | -0.169108 | -0.609629 | -2.851432 |

**N<sub>TS10</sub>**

SCF done: -2096.530424

|    |           |           |           |
|----|-----------|-----------|-----------|
| C  | -2.307095 | 1.310867  | 0.936254  |
| Ni | 0.406898  | -0.239198 | 0.571403  |
| C  | -0.854978 | 1.354671  | 1.325562  |
| C  | -0.375982 | 0.406572  | 2.383522  |
| C  | 0.580964  | 0.864546  | 3.338976  |
| C  | 1.051682  | 0.043067  | 4.350672  |
| C  | 0.602001  | -1.288819 | 4.457570  |
| C  | -0.309266 | -1.771614 | 3.528270  |
| C  | -0.789690 | -0.954863 | 2.482095  |
| C  | 0.238623  | 1.598122  | -0.198791 |
| C  | 1.393287  | 2.369504  | 0.058847  |
| C  | 1.886876  | 3.311989  | -0.849252 |
| C  | 1.214107  | 3.532852  | -2.057911 |
| C  | -0.427613 | 1.863236  | -1.418414 |
| O  | 1.602161  | 4.437185  | -3.019440 |
| C  | 2.720990  | 5.264248  | -2.749891 |
| C  | -3.124566 | 2.372300  | 1.288970  |
| C  | -4.510928 | 2.395513  | 0.980684  |
| C  | -5.083525 | 1.288987  | 0.272402  |
| C  | -4.228928 | 0.216218  | -0.100937 |
| C  | -2.888560 | 0.227037  | 0.215789  |
| C  | -5.353431 | 3.481507  | 1.350799  |
| C  | -6.696680 | 3.473279  | 1.038880  |
| C  | -7.262578 | 2.376650  | 0.338400  |
| C  | -6.471539 | 1.310316  | -0.035691 |
| H  | -0.626173 | 2.360507  | 1.670487  |
| H  | 0.916135  | 1.898296  | 3.287854  |
| H  | 1.759743  | 0.436980  | 5.076360  |
| H  | 0.958443  | -1.924968 | 5.263672  |
| H  | -0.679866 | -2.790969 | 3.609715  |
| H  | -1.609192 | -1.324741 | 1.875713  |
| H  | 1.929397  | 2.236931  | 0.996318  |
| H  | 2.788831  | 3.861097  | -0.598310 |
| H  | -1.346976 | 1.338120  | -1.658618 |
| H  | 2.828170  | 5.916393  | -3.619396 |
| H  | 3.640221  | 4.674795  | -2.624285 |
| H  | 2.560464  | 5.877096  | -1.851930 |
| H  | -2.702807 | 3.220609  | 1.825779  |
| H  | -4.645064 | -0.621980 | -0.655685 |
| H  | -2.253779 | -0.591352 | -0.112107 |
| H  | -4.918682 | 4.322205  | 1.887501  |
| H  | -7.328130 | 4.309439  | 1.328773  |
| H  | -8.322660 | 2.381122  | 0.097449  |
| H  | -6.902107 | 0.468106  | -0.573794 |
| C  | 0.052018  | 2.798751  | -2.332672 |
| H  | -0.472848 | 2.982192  | -3.266931 |
| N  | 0.760802  | -2.577199 | -1.189280 |
| N  | 2.651799  | -1.598488 | -0.727205 |
| C  | 1.308193  | -1.524752 | -0.515582 |
| C  | 3.650412  | -0.737195 | -0.163400 |
| C  | 4.209291  | 0.272183  | -0.969436 |
| C  | 4.116995  | -0.966418 | 1.144939  |
| C  | 5.236630  | 1.059324  | -0.435227 |
| C  | 5.141404  | -0.148753 | 1.638124  |
| C  | 5.713592  | 0.869697  | 0.866830  |
| H  | 5.672773  | 1.841881  | -1.054028 |
| H  | 5.505647  | -0.319408 | 2.649890  |

|   |           |           |           |
|---|-----------|-----------|-----------|
| C | -4.802135 | -3.965975 | -1.710154 |
| H | -4.917258 | -5.045790 | -1.869924 |
| H | -5.370167 | -3.712569 | -0.805882 |
| H | -5.271479 | -3.452395 | -2.555862 |
| C | -0.385709 | -4.420031 | 0.707713  |
| H | 0.370493  | -5.105526 | 0.301909  |
| H | 0.145728  | -3.662116 | 1.291064  |
| H | -1.020723 | -4.998896 | 1.386520  |
| C | 3.710959  | 0.514100  | -2.374534 |
| H | 2.627668  | 0.669116  | -2.388509 |
| H | 4.184163  | 1.401771  | -2.805492 |
| H | 3.932443  | -0.331067 | -3.039885 |
| C | 6.802183  | 1.754276  | 1.432478  |
| H | 7.404868  | 1.222304  | 2.177259  |
| H | 7.475312  | 2.114798  | 0.646440  |
| H | 6.377293  | 2.637753  | 1.928822  |
| C | 3.534746  | -2.061923 | 2.006701  |
| H | 2.487874  | -1.858116 | 2.255991  |
| H | 3.563660  | -3.036098 | 1.502979  |
| H | 4.093892  | -2.153535 | 2.943415  |
| C | 1.737793  | -3.371395 | -1.963953 |
| H | 1.579577  | -3.228353 | -3.040909 |
| C | 1.630730  | -4.439446 | -1.745615 |
| H | 3.076613  | -2.793485 | -1.487054 |
| H | 3.623370  | -3.484801 | -0.831649 |
| H | 3.740857  | -2.516831 | -2.311819 |

**N<sub>11</sub>**

SCF done: -2086.013294

|    |          |           |           |
|----|----------|-----------|-----------|
| C  | 2.316408 | 2.288800  | 1.667479  |
| Ni | 0.112892 | -0.374795 | 0.372255  |
| C  | 0.830560 | 2.139722  | 1.999516  |
| C  | 0.344176 | 0.672491  | 2.072680  |
| C  | 1.034885 | 0.333012  | 1.882517  |
| C  | 1.603482 | -0.831989 | 2.531134  |
| C  | 0.751910 | -1.731252 | 3.249852  |
| C  | 0.653697 | -1.443731 | 3.309542  |
| C  | 1.167521 | -0.295767 | 2.764324  |
| C  | 0.032416 | 3.001514  | 1.068894  |
| C  | 0.243431 | 3.137390  | -0.293851 |
| C  | 0.573204 | 3.908347  | -1.126051 |
| C  | 1.695520 | 4.556591  | -0.603518 |
| C  | 1.153652 | 3.673017  | 1.583334  |
| O  | 2.575714 | 5.341289  | -1.338220 |
| C  | 2.334286 | 5.474586  | -2.768943 |
| C  | 3.060692 | 3.293998  | 2.302384  |
| C  | 4.407064 | 3.493562  | 1.995850  |
| C  | 5.035390 | 2.684137  | 1.046047  |
| C  | 4.306703 | 1.677108  | 0.410223  |
| C  | 2.957954 | 1.481267  | 0.718065  |
| H  | 0.695146 | 2.550831  | 3.012412  |
| H  | 1.726039 | 1.086600  | 1.516968  |
| H  | 1.305502 | -2.143885 | 3.823570  |
| H  | 2.225441 | -0.077941 | 2.868434  |
| H  | 1.118470 | 2.653301  | -0.709470 |
| H  | 0.319210 | 4.000392  | -2.173726 |
| H  | 1.382535 | 3.592993  | 2.641269  |
| H  | 3.141126 | 6.110725  | -3.134502 |
| H  | 1.367954 | 5.950536  | -2.977211 |

|   |          |           |           |                               |           |           |           |
|---|----------|-----------|-----------|-------------------------------|-----------|-----------|-----------|
| H | 2.371185 | 4.502749  | -3.277885 | C                             | 2.114610  | 1.266221  | -1.247089 |
| H | 2.576447 | 3.926056  | 3.039930  | C                             | 1.160254  | 0.412667  | -0.621824 |
| H | 4.777359 | 1.029126  | -0.319181 | C                             | 1.601652  | -0.702023 | 0.059336  |
| H | 2.401339 | 0.683949  | 0.232760  | C                             | 3.459689  | -2.158307 | 0.850630  |
| C | 1.977768 | 4.434753  | 0.763359  | C                             | 4.808958  | -2.436951 | 0.925019  |
| H | 2.843362 | 4.953417  | 1.154410  | C                             | 5.751411  | -1.581508 | 0.300088  |
| N | 1.037969 | -1.847431 | -1.985821 | C                             | 5.324988  | -0.463649 | -0.387021 |
| N | 1.150365 | -1.710082 | -1.892366 | C                             | -0.306434 | 0.785601  | -0.744864 |
| C | 0.003466 | -1.352158 | -1.238056 | O                             | -2.596751 | -0.036687 | -1.964544 |
| C | 2.494069 | -1.362392 | -1.517649 | C                             | -2.264273 | -0.587145 | -0.920737 |
| C | 3.042801 | -0.135534 | -1.930612 | O                             | -1.112523 | -0.307351 | -0.234613 |
| C | 3.267511 | -2.289420 | -0.800936 | N                             | -2.979006 | -1.553806 | -0.296554 |
| C | 4.379688 | 0.141291  | -1.630839 | C                             | -2.617398 | -2.209485 | 0.969453  |
| C | 4.605706 | -1.985611 | -0.528095 | C                             | -3.665658 | -3.328504 | 1.091894  |
| C | 5.178420 | -0.779099 | -0.941714 | C                             | -4.893016 | -2.756499 | 0.358338  |
| H | 4.802837 | 1.091941  | -1.939751 | C                             | -4.278297 | -1.993344 | -0.824983 |
| H | 5.202640 | -2.698514 | 0.031224  | C                             | -0.681224 | 2.067731  | -0.009934 |
| C | 2.424229 | -1.830802 | -1.613519 | C                             | -0.211282 | 2.327340  | 1.285742  |
| C | 3.301952 | -0.959368 | -2.283744 | C                             | -0.598894 | 3.486184  | 1.961179  |
| C | 2.910073 | -2.730823 | -0.646313 | C                             | -1.456570 | 4.404764  | 1.345508  |
| C | 4.669294 | -1.015221 | -1.993968 | C                             | -1.926251 | 4.155079  | 0.053381  |
| C | 4.281277 | -2.746843 | -0.369283 | C                             | -1.541985 | 2.990631  | -0.619309 |
| C | 5.174133 | -1.902561 | -1.036439 | H                             | 4.176940  | 1.651450  | -1.666097 |
| H | 5.348508 | -0.353275 | -2.522838 | H                             | 1.767717  | 2.146798  | -1.783169 |
| H | 4.658176 | -3.438717 | 0.377157  | H                             | 0.883614  | -1.364369 | 0.532643  |
| C | 2.765146 | 0.043040  | -3.287915 | H                             | 2.735636  | -2.814891 | 1.328593  |
| H | 3.552023 | 0.739128  | -3.591735 | H                             | 5.154686  | -3.315919 | 1.463207  |
| H | 1.940784 | 0.612699  | -2.846629 | H                             | 6.812028  | -1.810707 | 0.364234  |
| H | 2.384152 | -0.454295 | -4.188273 | H                             | 6.045624  | 0.194249  | -0.868319 |
| C | 6.655480 | -1.920482 | -0.702360 | H                             | -0.559800 | 0.905584  | -1.801855 |
| H | 6.964651 | -2.906888 | -0.342284 | H                             | -2.682511 | -1.496563 | 1.802667  |
| H | 6.876998 | -1.189120 | 0.085843  | H                             | -1.592182 | -2.589701 | 0.933596  |
| H | 7.260279 | -1.666837 | -1.579148 | H                             | -3.869458 | -3.592416 | 2.134496  |
| C | 1.964838 | -3.648895 | 0.102036  | H                             | -3.309540 | -4.231783 | 0.580595  |
| H | 1.294186 | -4.177272 | -0.583831 | H                             | -5.433407 | -2.060945 | 1.012945  |
| H | 1.341549 | -3.061353 | 0.786743  | H                             | -5.598265 | -3.528416 | 0.034654  |
| H | 2.526573 | -4.387299 | 0.681516  | H                             | -4.134226 | -2.643126 | -1.699472 |
| C | 2.182923 | 0.883693  | -2.649640 | H                             | -4.868124 | -1.130536 | -1.146580 |
| H | 1.382575 | 1.227349  | -1.985226 | H                             | 0.465607  | 1.623471  | 1.763228  |
| H | 2.782471 | 1.749798  | -2.945082 | H                             | -0.226624 | 3.676400  | 2.964884  |
| H | 1.721077 | 0.456621  | -3.547494 | H                             | -1.753558 | 5.309909  | 1.869502  |
| C | 6.641692 | -0.476655 | -0.667068 | H                             | -2.592759 | 4.863692  | -0.432041 |
| H | 7.257799 | -0.727699 | -1.540417 | H                             | -1.922442 | 2.786112  | -1.616829 |
| H | 6.787805 | 0.586132  | -0.446930 |                               |           |           |           |
| H | 7.009940 | -1.058956 | 0.183503  |                               |           |           |           |
| C | 2.640812 | -3.570205 | -0.287592 | <b>arylboronic ester(OMe)</b> |           |           |           |
| H | 1.804434 | -3.328531 | 0.376703  | SCF done: -601.405446         |           |           |           |
| H | 2.259563 | -4.189386 | -1.108303 | C                             | 2.415339  | 0.202248  | -0.088036 |
| H | 3.371048 | -4.153999 | 0.278357  | C                             | 1.633459  | 1.307414  | -0.458083 |
| C | 0.606849 | -2.676000 | -3.165188 | C                             | 0.245748  | 1.215483  | -0.437027 |
| H | 1.098070 | -2.329908 | -4.076873 | C                             | -0.422237 | 0.028340  | -0.062690 |
| H | 0.864733 | -3.725846 | -2.991710 | C                             | 0.391606  | -1.065926 | 0.283943  |
| C | 0.922032 | -2.442822 | -3.185736 | B                             | -1.982062 | -0.151159 | -0.056748 |
| H | 1.490978 | -3.375022 | -3.197768 | O                             | -2.452028 | -1.426515 | -0.239830 |
| H | 1.235594 | -1.816306 | -4.026656 | C                             | -3.845864 | -1.721662 | -0.201224 |
| H | 6.082858 | 2.834107  | 0.809269  | O                             | -2.926640 | 0.828245  | 0.127874  |
| H | 4.964781 | 4.275462  | 2.499273  | C                             | -2.699950 | 2.174640  | 0.516769  |
| C | 1.319678 | -2.860616 | 3.883437  | H                             | 2.134490  | 2.222872  | -0.759532 |
| H | 0.666936 | -3.537821 | 4.426082  | H                             | -0.081039 | -2.005690 | 0.556567  |
| C | 2.993159 | -1.094107 | 2.499001  | H                             | -3.951329 | -2.799226 | -0.353901 |
| H | 3.637779 | -0.416923 | 1.949695  | H                             | -4.382974 | -1.186949 | -0.992669 |
| C | 3.524853 | -2.203532 | 3.135794  | H                             | -4.281525 | -1.444561 | 0.765682  |
| H | 4.592966 | -2.387718 | 3.100476  | H                             | -3.593621 | 2.518163  | 1.046781  |
| C | 2.683295 | -3.096149 | 3.830142  | H                             | -2.552649 | 2.809771  | -0.365265 |
| H | 3.106503 | -3.961575 | 4.327770  | H                             | -1.831849 | 2.267120  | 1.178640  |
|   |          |           |           | H                             | -0.323039 | 2.088851  | -0.743608 |
|   |          |           |           | C                             | 1.787588  | -0.993734 | 0.286175  |
|   |          |           |           | H                             | 2.366122  | -1.865962 | 0.570705  |
|   |          |           |           | O                             | 3.767669  | 0.388885  | -0.128974 |
|   |          |           |           | C                             | 4.617104  | -0.695307 | 0.223212  |
|   |          |           |           | H                             | 5.636290  | -0.319433 | 0.116979  |
|   |          |           |           | H                             | 4.450961  | -1.011792 | 1.261308  |

  

|                        |          |           |           |
|------------------------|----------|-----------|-----------|
| <b>Substrate(OMe)</b>  |          |           |           |
| SCF done: -1056.244896 |          |           |           |
| C                      | 2.988486 | -1.013087 | 0.151128  |
| C                      | 3.941767 | -0.149892 | -0.479973 |
| C                      | 3.460845 | 0.992617  | -1.179590 |

H 4.471703 -1.551273 -0.448739

**(dimethyl boric)pyrrolidine-1-carboxylic anhydride (OMe)**

SCF done: -655.847877

O 0.596242 0.471776 0.096574  
N -1.593734 -0.081530 0.186174  
C -0.357250 -0.334368 0.674611  
O -0.103513 -1.132890 1.562757  
C -2.774029 -0.760104 0.740750  
C -3.946164 0.006101 0.108182  
C -3.379005 0.474701 -1.244844  
C -1.920170 0.834813 -0.917199  
B 1.904113 0.043930 -0.139824  
O 2.117765 -1.206106 -0.621892  
C 3.437664 -1.698323 -0.846624  
O 2.936228 0.920375 0.022658  
C 2.740971 2.225110 0.567341  
H -2.758654 -0.716176 1.833704  
H -2.771757 -1.819754 0.451396  
H -4.207143 0.873396 0.728005  
H -4.842150 -0.614259 0.006828  
H -3.928133 1.318389 -1.674900  
H -3.406133 -0.348631 -1.969738  
H -1.240990 0.684963 -1.761007  
H -1.825983 1.879660 -0.589766  
H 3.337602 -2.700023 -1.271645  
H 3.994807 -1.757017 0.094828  
H 3.984499 -1.054957 -1.544819  
H 3.730901 2.668371 0.701544  
H 2.228595 2.175662 1.533941  
H 2.154236 2.848614 -0.116555

**K[ArB(OCH<sub>3</sub>)<sub>2</sub>(OH)] (Ar=p-OMePh)**

SCF done: -705.402969

C -3.466229 -0.034529 0.298860  
C -2.726781 0.846294 1.105328  
C -1.363090 1.005471 0.889439  
C -0.674600 0.290227 -0.115995  
C -1.440492 -0.593201 -0.896676  
B 0.867566 0.441414 -0.360161  
O 1.725089 -0.590595 -0.584937  
C 1.544339 -1.991067 -0.273364  
O 1.540262 1.658629 -0.378545  
C 0.915051 2.937896 -0.429797  
H -3.242532 1.390488 1.891171  
H -0.958126 -1.173858 -1.679710  
H 2.481806 -2.317172 0.206512  
H 1.376357 -2.533735 -1.210059  
H 0.685632 -2.128858 0.391233  
H 0.882987 3.382673 0.571949  
H -0.102798 2.876709 -0.826957  
H 1.516975 3.580170 -1.080744  
H -0.818930 1.692328 1.534099  
C -2.817369 -0.755852 -0.712494  
H -3.362685 -1.443419 -1.349600  
O -4.798284 -0.118306 0.577295  
C -5.604513 -1.000283 -0.195115  
H -6.614380 -0.906024 0.207412  
H -5.604993 -0.713988 -1.254897  
H -5.266105 -2.039557 -0.094748  
K 4.213872 0.251109 0.046412  
O 4.477115 -1.966263 0.918086  
H 4.874044 -2.741346 1.336996

**potassium pyrrolidine-1-carboxylate**

SCF done: -428.791561

O -1.072649 -1.132124 0.082452  
N 0.899087 -0.000519 -0.022755  
C -0.481451 -0.000066 -0.007792  
O -1.074210 1.131979 -0.087158

C 1.703602 1.219079 -0.078761  
C 3.118592 0.725390 0.272038  
C 3.125898 -0.724656 -0.246789  
C 1.702639 -1.218497 0.066588  
H 1.320240 1.970005 0.619661  
H 1.672123 1.666819 -1.084849  
H 3.258596 0.732683 1.361312  
H 3.904973 1.347833 -0.169667  
H 3.900356 -1.346875 0.215804  
H 3.294470 -0.732081 -1.331982  
H 1.341873 -1.975684 -0.637210  
H 1.642214 -1.658762 1.074708  
K -3.393119 -0.000349 0.006181

**Product (S)**

SCF done: -1001.844069

C 1.156387 4.418983 -0.601664  
C 0.454024 4.827270 0.536257  
C -0.310212 3.898244 1.242876  
C -0.376808 2.568268 0.816303  
C 0.326110 2.149801 -0.318980  
C 1.093164 3.091229 -1.022295  
C 0.307738 0.694411 -0.809680  
C 3.944910 -1.491450 0.178701  
C 3.567342 -0.376385 0.938934  
C 2.419620 0.340319 0.621257  
C 1.609638 -0.039066 -0.460359  
C 1.995851 -1.152434 -1.213039  
H -0.861644 4.206366 2.124029  
H -0.984196 1.853745 1.357310  
H 1.647476 2.775388 -1.900185  
H 4.198348 -0.090680 1.770351  
H 1.382143 -1.469415 -2.050132  
H 2.149643 1.210038 1.207262  
C 3.149888 -1.874889 -0.905812  
H 3.416257 -2.728358 -1.514618  
O 5.107882 -2.132798 0.577284  
C 5.538967 -3.300623 -0.182811  
H 6.455029 -3.632860 0.306294  
H 4.791799 -4.103174 -0.150791  
H 5.750723 -3.048030 -1.229120  
H 0.234310 0.727056 -1.905002  
C -0.920821 -0.070284 -0.299580  
C -2.104112 -0.022272 -1.007951  
C -0.873782 -0.806670 0.916891  
C -3.273896 -0.687707 -0.551474  
H -2.157486 0.539340 -1.936144  
C -1.988978 -1.457009 1.392590  
H 0.064461 -0.859817 1.454796  
C -3.218704 -1.421747 0.679422  
H -1.940913 -2.016534 2.321125  
H 0.500434 5.859240 0.864443  
H 1.750179 5.134242 -1.159516  
C -4.388508 -2.089081 1.136876  
H -4.340906 -2.644135 2.067967  
C -4.499714 -0.650545 -1.273704  
H -4.539482 -0.093367 -2.203878  
C -5.614482 -1.305919 -0.802649  
H -6.543431 -1.270288 -1.359930  
C -5.558710 -2.032840 0.414270  
H -6.445268 -2.544017 0.771194

**Product (R)**

SCF done: -1001.843069

C -1.051794 0.285900 -0.220954  
C 0.333888 0.694549 -0.731052  
C 0.677486 2.146658 -0.368750  
C 0.060004 3.187005 -1.082133  
C 0.318892 4.524128 -0.776106  
C 1.205042 4.848011 0.257272  
C 1.827499 3.822626 0.972438

|   |           |           |           |
|---|-----------|-----------|-----------|
| C | 1.567937  | 2.483192  | 0.659162  |
| C | 1.434776  | -0.302068 | -0.353289 |
| C | 2.557573  | -0.422513 | -1.179883 |
| C | 3.609672  | -1.294820 | -0.880530 |
| C | 3.547243  | -2.076921 | 0.280024  |
| C | 1.389915  | -1.101425 | 0.800429  |
| O | 4.512802  | -2.963209 | 0.673477  |
| C | 5.669315  | -3.110342 | -0.138103 |
| C | -1.856474 | -0.527150 | -0.997192 |
| C | -3.138619 | -0.957152 | -0.559622 |
| C | -3.609924 | -0.533656 | 0.725984  |
| C | -2.771366 | 0.305350  | 1.509322  |
| C | -1.535256 | 0.706303  | 1.050271  |
| C | -3.973088 | -1.791066 | -1.355675 |
| C | -5.213155 | -2.189021 | -0.902531 |
| C | -5.678966 | -1.769249 | 0.370310  |
| C | -4.894113 | -0.959790 | 1.164408  |
| H | 0.267276  | 0.667463  | -1.826738 |
| H | -0.635777 | 2.943677  | -1.883116 |
| H | -0.168768 | 5.312490  | -1.344532 |
| H | 1.410208  | 5.888186  | 0.497578  |
| H | 2.522310  | 4.060979  | 1.774314  |
| H | 2.071675  | 1.696535  | 1.213687  |
| H | 2.623702  | 0.182028  | -2.082739 |
| H | 4.456853  | -1.354959 | -1.554844 |
| H | 0.527848  | -1.052546 | 1.459361  |
| H | 6.292125  | -3.852920 | 0.364048  |
| H | 6.223009  | -2.165442 | -0.220528 |
| H | 5.410176  | -3.471141 | -1.142543 |
| H | -1.505099 | -0.859009 | -1.973361 |
| H | -3.123960 | 0.638046  | 2.483499  |
| H | -0.923218 | 1.364110  | 1.660994  |
| H | -3.614967 | -2.112704 | -2.331399 |
| H | -5.839738 | -2.827212 | -1.520449 |
| H | -6.658480 | -2.088671 | 0.716895  |
| H | -5.249219 | -0.635858 | 2.140545  |
| C | 2.427860  | -1.974417 | 1.118041  |
| H | 2.385547  | -2.592173 | 2.010480  |
